# Supplementary material for: Ex vivo and in vivo CRISPR/Cas9 screenings identify the roles of protein N-glycosylation in regulating T-cell activation and functions
Source: bioRxiv preprint, doi:10.1101/2025.08.20.671236, version 3 (2025-12-29)
Supplement: Supplementary Table 2 [file 671236_file03.xlsx]

## Sheet: Sheet1
PLASMID	SOURCE	IDENTIFIER
Mouse Two Plasmid Activity-Optimized CRISPR Knockout Library	Addgene	#1000000096
pMSCV-U6 sgRNA(BbsI)-PGK-puro-2A-BFP	Addgene	#102796
pMSCV-U6 sgB4galt1-PGK-puro-2A-BFP	This paper	N/A
pMSCV-U6 sgB4galt1-PGK-puro-2A-B4galt1 long isoform	This paper	N/A
pMSCV-U6 sgB4galt1-PGK-puro-2A-B4galt1 short isoform	This paper	N/A
pMSCV-CD19 scFv-IRES-RFP-U6 sgRNA	This paper	N/A
pLenti-SFFV-NY ESO-1 TCR-2A-BFP-U6 shRNA	This paper	N/A
pLenti-EF1α-puro-2A-OVA	This paper	N/A
pMSCV-U6 sgB4galt1-PGK-CD8b-CD3e fusion-2A-puro	This paper	N/A
pMSCV-U6 sgRNA(BbsI)-PGK-CD8b-CD3e fusion-2A-puro	This paper	N/A
psPAX2	Addgene	#12260
pMD2.G	Addgene	#12259
pCL-Eco	Addgene	#12371
