# Supplementary material for: Ex vivo and in vivo CRISPR/Cas9 screenings identify the roles of protein N-glycosylation in regulating T-cell activation and functions
Source: bioRxiv preprint, doi:10.1101/2025.08.20.671236, version 3 (2025-12-29)
Supplement: Supplementary Table 4 [file 671236_file05.xlsx]

## Sheet: Fig 1b
Gene	gRNA number	PD1 high|p-value	PD1 high|fdr	PD1 high|rank	lfc (PD1 low/PD1 high)	PD1 low|p-value	PD1 low|fdr	PD1 low|rank	lfc (PD1 low/PD1 high)
Ikzf1	10	2.6006e-07	0.002475	1	-2.327	0.93771	1	17566	-2.327
B4galt1	9	2.6006e-07	0.002475	2	-2.2425	1	1	19036	-2.2425
Smg7	10	3.3808e-06	0.021452	3	-2.2944	0.96782	1	18353	-2.2944
Mgat2	9	9.1021e-06	0.028878	4	-3.0619	0.98018	1	18632	-3.0619
Dpm3	10	8.582e-06	0.028878	5	-2.0572	0.91377	1	16961	-2.0572
Cd274	10	9.1021e-06	0.028878	6	-0.28788	0.63778	1	11626	-0.28788
Dpm2	10	1.2223e-05	0.033239	7	-2.0904	0.8593	1	16010	-2.0904
Sel1l	10	4.499e-05	0.107054	8	-1.7234	0.97884	1	18602	-1.7234
Gne	10	5.6953e-05	0.110261	9	-1.676	0.99995	1	19032	-1.676
Dscc1	10	5.8513e-05	0.110261	10	-1.8209	0.91916	1	17109	-1.8209
Mgat5	10	6.3715e-05	0.110261	11	-1.7802	0.56224	1	10167	-1.7802
Clec9a	10	0.0001537	0.209571	12	-0.90393	0.99998	1	19035	-0.90393
Sfxn2	10	0.00016046	0.209571	13	-1.6699	0.14701	0.997683	2745	-1.6699
Fam174b	10	0.00016254	0.209571	14	-1.6974	0.43058	1	7922	-1.6974
Alg10b	9	0.00016514	0.209571	15	-1.5998	0.98873	1	18802	-1.5998
1600015I10Rik	10	0.00022027	0.262067	16	-0.7382	0.21147	1	3904	-0.7382
Alg12	10	0.00032013	0.336881	17	-1.6056	0.99177	1	18864	-1.6056
Ston2	9	0.00032013	0.336881	18	-1.285	0.99996	1	19034	-1.285
Edem1	10	0.00034094	0.336881	19	-1.2936	0.99996	1	19033	-1.2936
Mgat4a	9	0.00035394	0.336881	20	-2.1073	0.95236	1	18011	-2.1073
Zbtb33	8	0.00042104	0.38166	21	-2.1702	0.88491	1	17050	-2.1702
Nptn	8	0.00046837	0.405266	22	-0.15046	0.54979	1	10610	-0.15046
B4galt7	10	0.00062284	0.485347	23	-1.4101	0.97259	1	18461	-1.4101
Armc7	10	0.00063741	0.485347	24	-0.71373	0.78284	1	14312	-0.71373
Gtf2a1l	8	0.000627	0.485347	25	-1.3438	0.99841	1	18998	-1.3438
Lbh	10	0.00068526	0.501714	26	-1.682	0.98828	1	18789	-1.682
Tm2d1	10	0.00071906	0.506967	27	-1.4843	0.92881	1	17339	-1.4843
Rasl10b	9	0.0007742	0.517071	28	-1.507	0.995	1	18936	-1.507
Itpkb	10	0.00078772	0.517071	29	-0.87031	0.87635	1	16353	-0.87031
Edem2	9	0.00090839	0.550524	30	-1.3674	0.82111	1	15415	-1.3674
Bglap2	10	0.00092711	0.550524	31	-0.0027491	0.12597	0.968847	2397	-0.0027491
Tbc1d2	10	0.0009396	0.550524	32	0.19378	0.43787	1	8078	0.19378
Mia3	9	0.00098329	0.550524	33	-1.441	0.35056	1	6625	-1.441
Bambi	10	0.00096768	0.550524	34	-1.4422	0.88585	1	16497	-1.4422
Mta3	10	0.0010457	0.567327	35	-0.12781	0.17351	1	3188	-0.12781
Gsdma2	10	0.001117	0.567327	36	-1.87	0.82735	1	15303	-1.87
Ms4a1	10	0.0011674	0.567327	37	-1.5843	0.76049	1	13883	-1.5843
Pigf	10	0.0011867	0.567327	38	-0.30335	0.70575	1	12947	-0.30335
Trpc6	10	0.0012303	0.567327	39	-0.81275	0.98582	1	18743	-0.81275
Fam151a	10	0.0012844	0.567327	40	-1.6741	0.96056	1	18168	-1.6741
Clptm1	10	0.0013099	0.567327	41	-1.4427	0.41249	1	7579	-1.4427
4921536K21Rik	10	0.0013214	0.567327	42	-1.1767	0.99313	1	18899	-1.1767
Atxn2l	9	0.0013411	0.567327	43	-1.7853	0.61355	1	11437	-1.7853
Foxg1	8	0.0013016	0.567327	44	-1.7535	0.85668	1	16548	-1.7535
Trp53rk	8	0.001325	0.567327	45	-1.7053	0.074106	0.907649	1638	-1.7053
Colgalt2	10	0.0014379	0.595028	46	-0.49253	0.83815	1	15547	-0.49253
Mycbp2	10	0.0015024	0.601588	47	-1.9518	0.86345	1	16103	-1.9518
Impact	9	0.0015169	0.601588	48	-1.2966	0.976	1	18540	-1.2966
Sgk3	10	0.0015507	0.602445	49	-0.47809	0.98344	1	18692	-0.47809
Mina	9	0.0016641	0.633564	50	-1.5722	0.53714	1	10113	-1.5722
Muc4	10	0.0017328	0.646768	51	-0.55807	0.77362	1	14129	-0.55807
Mef2d	10	0.00183	0.654815	52	-1.6258	0.63194	1	11509	-1.6258
Smc3	10	0.0018592	0.654815	53	0.097139	0.15756	1	2913	0.097139
Lrrfip2	10	0.0018696	0.654815	54	0.2654	0.01476	0.693742	403	0.2654
Birc5	9	0.0018919	0.654815	55	-0.4554	0.42667	1	7945	-0.4554
Gale	10	0.0019502	0.662924	56	-1.3657	0.81304	1	14983	-1.3657
Baz1a	10	0.0020313	0.67056	57	-1.6977	0.87184	1	16260	-1.6977
Pign	9	0.0020891	0.67056	58	-1.6795	0.93478	1	17670	-1.6795
Hhipl1	8	0.0020579	0.67056	59	-1.8276	0.4773	1	9320	-1.8276
Pram1	9	0.0021442	0.67056	60	-1.4974	0.80995	1	15212	-1.4974
Ocln	10	0.0022248	0.67056	61	-0.47297	0.6147	1	11179	-0.47297
Hspb2	10	0.0022456	0.67056	62	0.027837	0.90345	1	16739	0.027837
Afp	10	0.0022482	0.67056	63	-1.4738	0.60561	1	11008	-1.4738
Smg6	10	0.0023174	0.678675	64	-1.1238	0.95687	1	18077	-1.1238
Ear5	10	0.0024157	0.686403	65	-1.4836	0.41075	1	7550	-1.4836
Sgcd	8	0.0022545	0.67056	66	-1.4203	0.96183	1	18206	-1.4203
Hivep3	9	0.0025005	0.686403	67	-1.4567	0.99917	1	19013	-1.4567
Hap1	9	0.0025036	0.686403	68	-0.58075	0.3735	1	7037	-0.58075
Myt1	10	0.0025847	0.686403	69	-1.2451	0.4824	1	8871	-1.2451
Gpi1	9	0.0025312	0.686403	70	-1.6257	0.8756	1	16396	-1.6257
Paxbp1	9	0.0025629	0.686403	71	-1.1441	0.95236	1	18015	-1.1441
Tmpo	10	0.0026773	0.686403	72	-1.1353	0.99949	1	19023	-1.1353
Prrt4	10	0.0026825	0.686403	73	1.0637	0.0020599	0.356481	110	1.0637
Akap14	10	0.0027044	0.686403	74	-1.8423	0.98283	1	18682	-1.8423
Syt10	10	0.0028136	0.704729	75	-1.3314	0.99963	1	19025	-1.3314
Dgkh	8	0.0026555	0.686403	76	-1.7698	0.56696	1	10856	-1.7698
Tef	10	0.0029186	0.705598	77	-0.37284	0.82574	1	15258	-0.37284
Satb1	9	0.0028854	0.705598	78	-1.3382	0.99669	1	18965	-1.3382
Thbs1	10	0.0030024	0.705598	79	-0.14946	0.93329	1	17461	-0.14946
Ddx5	9	0.0029545	0.705598	80	-1.526	0.97147	1	18442	-1.526
Spata31d1c	9	0.0029847	0.705598	81	-0.50916	0.7489	1	14078	-0.50916
Hs3st1	10	0.0031116	0.714959	82	-1.3496	0.90106	1	16710	-1.3496
Svs1	10	0.0031173	0.714959	83	-1.0715	0.99258	1	18886	-1.0715
Sult2a4	10	0.0032869	0.729277	84	-0.82526	0.98162	1	18658	-0.82526
Med13	10	0.0032947	0.729277	85	-1.4177	0.4839	1	8900	-1.4177
Krt83	10	0.003366	0.736486	86	-0.29528	0.54632	1	9906	-0.29528
Ano2	9	0.003271	0.729277	87	-0.92834	0.87549	1	16391	-0.92834
Ccdc153	10	0.0036562	0.742335	88	-1.4491	0.99945	1	19022	-1.4491
Qpct	9	0.0035215	0.742335	89	-1.5438	0.89141	1	16868	-1.5438
Gsg1	10	0.0036926	0.742335	90	-1.6173	0.72212	1	13265	-1.6173
Gap43	10	0.0037155	0.742335	91	-1.2773	0.98395	1	18707	-1.2773
Yes1	9	0.0035839	0.742335	92	-0.15343	0.31169	1	5949	-0.15343
Copz2	10	0.003755	0.742335	93	-0.71638	0.98473	1	18720	-0.71638
Adipor2	9	0.0036307	0.742335	94	-0.78913	0.28888	1	5467	-0.78913
Pgm3	10	0.0038757	0.742335	95	-1.3353	0.69113	1	12665	-1.3353
Nmbr	9	0.0037997	0.742335	96	-0.83331	0.97674	1	18554	-0.83331
Ttl	10	0.0040452	0.742335	97	-1.43	0.97176	1	18448	-1.43
Enpp3	10	0.0040489	0.742335	98	-1.2569	0.99963	1	19026	-1.2569
Trim45	9	0.0038923	0.742335	99	-0.79502	0.54153	1	10196	-0.79502
Slc35b3	9	0.0039069	0.742335	100	-0.99852	0.56347	1	10625	-0.99852
Nab1	10	0.0043225	0.742335	101	-1.2026	0.72457	1	13309	-1.2026
Mfsd4	9	0.0041409	0.742335	102	-1.5466	0.37903	1	7143	-1.5466
Col5a3	9	0.0041955	0.742335	103	0.1193	0.92054	1	17399	0.1193
Rbm8a	9	0.004246	0.742335	104	-1.7178	0.89671	1	16968	-1.7178
Plag1	10	0.0044941	0.742335	105	-1.5873	0.74185	1	13566	-1.5873
Gpr139	9	0.004363	0.742335	106	-1.1909	0.96631	1	18321	-1.1909
Ssr3	9	0.0043932	0.742335	107	-1.7129	0.87715	1	16449	-1.7129
Pigm	8	0.0041498	0.742335	108	-1.9468	0.24417	1	4814	-1.9468
Dmrtb1	8	0.0041513	0.742335	109	-1.2281	0.99507	1	18940	-1.2281
Eml6	8	0.0042658	0.742335	110	-0.31419	0.35655	1	6783	-0.31419
Dohh	10	0.0048863	0.742335	111	-1.203	0.47519	1	8760	-1.203
Zmynd8	9	0.0046356	0.742335	112	-1.5793	0.98872	1	18801	-1.5793
Hnf4g	10	0.0049482	0.742335	113	-1.3055	0.72181	1	13256	-1.3055
Nphp3	10	0.0049648	0.742335	114	-1.5787	0.80563	1	14823	-1.5787
Arhgef2	10	0.0049955	0.742335	115	-1.6832	0.78856	1	14439	-1.6832
Barx1	9	0.0047198	0.742335	116	-0.80539	0.88262	1	16620	-0.80539
Pmaip1	9	0.004777	0.742335	117	-1.1324	0.99969	1	19028	-1.1324
Ptplb	9	0.004789	0.742335	118	0.087258	0.49859	1	9285	0.087258
Fam3c	9	0.004828	0.742335	119	-1.5437	0.77513	1	14595	-1.5437
Lrriq1	8	0.0045253	0.742335	120	-1.542	0.94918	1	17938	-1.542
Ing1	9	0.0048982	0.742335	121	-1.1587	0.97526	1	18518	-1.1587
Pcyt1b	10	0.0052119	0.742335	122	-1.3137	0.94217	1	17693	-1.3137
Bloc1s6	10	0.0052275	0.742335	123	-1.6539	0.93057	1	17385	-1.6539
Cd36	9	0.0049273	0.742335	124	-0.57727	0.98058	1	18639	-0.57727
Ccdc11	10	0.0052483	0.742335	125	0.14231	0.37262	1	6799	0.14231
Adss	10	0.0052519	0.742335	126	-0.61181	0.35384	1	6446	-0.61181
Sbno2	10	0.0053351	0.742335	127	-1.5892	0.73967	1	13534	-1.5892
Dbn1	10	0.0053606	0.742335	128	0.0004786	0.12169	0.962106	2328	0.0004786
Irf2bp2	10	0.005371	0.742335	129	-0.52411	0.81804	1	15094	-0.52411
Dxo	9	0.0050946	0.742335	130	-1.2716	0.92113	1	17408	-1.2716
Mterf1b	10	0.0054433	0.742335	131	-0.43033	0.61364	1	11159	-0.43033
Fkbp3	10	0.0054475	0.742335	132	-1.2153	0.99978	1	19031	-1.2153
Kctd20	10	0.0056217	0.742335	133	-1.1496	0.99356	1	18906	-1.1496
Paqr5	10	0.005629	0.742335	134	-0.14336	0.5044	1	9232	-0.14336
Carhsp1	10	0.0056373	0.742335	135	-1.1697	0.99967	1	19027	-1.1697
Klrd1	10	0.0056467	0.742335	136	-0.9017	0.70946	1	13015	-0.9017
Lpcat2	10	0.0056524	0.742335	137	-1.7912	0.98152	1	18657	-1.7912
Cd44	10	0.0056545	0.742335	138	-1.1789	0.18472	1	3390	-1.1789
Zfyve16	8	0.0050012	0.742335	139	-1.0219	0.99889	1	19007	-1.0219
Mup20	9	0.0054173	0.742335	140	-0.46736	0.87604	1	16412	-0.46736
Smg8	8	0.0050803	0.742335	141	-1.0841	0.55858	1	10737	-1.0841
Prp2	9	0.00572	0.745795	142	-0.53176	0.23346	1	4310	-0.53176
Ypel5	8	0.0053585	0.742335	143	-1.4464	0.99934	1	19020	-1.4464
Pole2	10	0.0061522	0.760174	144	-0.58458	0.031194	0.796001	729	-0.58458
Stau1	7	0.0053606	0.742335	145	-0.90224	0.97199	1	18455	-0.90224
Snx32	10	0.006315	0.760174	146	-0.55396	0.8274	1	15306	-0.55396
Atp1a4	8	0.0055442	0.742335	147	-1.3427	0.70864	1	13672	-1.3427
Gm904	7	0.0055572	0.742335	148	-2.0621	0.95673	1	18109	-2.0621
Mboat7	9	0.0061559	0.760174	149	-1.2668	0.96568	1	18301	-1.2668
Ak7	9	0.0061996	0.760174	150	-1.4896	0.25121	1	4675	-1.4896
Rpap3	10	0.0065376	0.760174	151	-1.1068	0.93779	1	17568	-1.1068
A530064D06Rik	9	0.0062443	0.760174	152	-1.2031	0.16378	1	3124	-1.2031
Ccnd2	10	0.0066128	0.760174	153	-1.2131	0.95905	1	18130	-1.2131
Alg14	9	0.0062947	0.760174	154	-0.95281	0.82533	1	15491	-0.95281
Klhl2	9	0.0063057	0.760174	155	0.28701	0.75231	1	14162	0.28701
Epha6	9	0.0064731	0.760174	156	-0.90861	0.4427	1	8224	-0.90861
Hebp1	9	0.0065215	0.760174	157	-0.91805	0.99421	1	18917	-0.91805
Bpifb2	10	0.0068632	0.760174	158	-0.36346	0.36539	1	6656	-0.36346
Stag2	10	0.0068955	0.760174	159	-1.1039	0.587	1	10658	-1.1039
Fam151b	10	0.0068996	0.760174	160	-0.87017	0.87704	1	16368	-0.87017
Ceacam14	10	0.0070484	0.760174	161	-0.91753	0.79567	1	14607	-0.91753
Itga1	10	0.0070682	0.760174	162	-0.32635	0.50772	1	9280	-0.32635
Csnk1g1	8	0.0063306	0.760174	163	-1.6719	0.99641	1	18961	-1.6719
Rpl35	9	0.0068544	0.760174	164	-1.0215	0.42238	1	7870	-1.0215
Vapb	10	0.0071535	0.760174	165	-0.9871	0.40735	1	7501	-0.9871
Naip2	10	0.0071696	0.760174	166	-1.1645	0.86116	1	16050	-1.1645
Agpat3	8	0.00656	0.760174	167	-1.519	0.17649	1	3437	-1.519
Zrsr1	7	0.0063904	0.760174	168	-1.5374	0.076565	0.917237	1706	-1.5374
Ptplad2	9	0.0072445	0.760174	169	-0.61299	0.76076	1	14345	-0.61299
Atp13a5	10	0.0074791	0.760174	170	-1.413	0.70565	1	12946	-1.413
Gm826	10	0.0075316	0.760174	171	-0.64595	0.9444	1	17743	-0.64595
Spaca1	10	0.0075716	0.760174	172	-1.1968	0.96273	1	18219	-1.1968
Ptpn12	9	0.0074583	0.760174	173	-1.7239	0.60127	1	11232	-1.7239
2010111I01Rik	10	0.0077115	0.760174	174	-0.77162	0.94883	1	17851	-0.77162
Msh6	9	0.0075295	0.760174	175	-1.7637	0.70696	1	13014	-1.7637
1110059G10Rik	9	0.0075768	0.760174	176	-2.1232	0.86963	1	16273	-2.1232
Lcor	10	0.0078301	0.760174	177	0.12469	0.21532	1	3983	0.12469
Brf1	9	0.0076361	0.760174	178	-0.98293	0.99677	1	18966	-0.98293
B3gnt2	8	0.0070266	0.760174	179	-1.4099	0.96036	1	18172	-1.4099
Podnl1	10	0.0078868	0.760174	180	-0.10013	0.85975	1	16019	-0.10013
Ccnd3	9	0.0076902	0.760174	181	-1.29	0.24615	1	4564	-1.29
Phax	10	0.0079378	0.760174	182	-0.57262	0.60152	1	10935	-0.57262
Svip	9	0.0077612	0.760174	183	-0.987	0.85692	1	16072	-0.987
Sf3b5	10	0.0079622	0.760174	184	-1.3681	0.98008	1	18630	-1.3681
Cox8c	9	0.007801	0.760174	185	0.23995	0.038387	0.824973	913	0.23995
Nxf1	10	0.0080933	0.760174	186	-0.24755	0.52301	1	9528	-0.24755
D2Wsu81e	10	0.0081302	0.760174	187	0.65644	0.16327	1	3020	0.65644
Zfp609	9	0.008033	0.760174	188	-0.61956	0.89986	1	17031	-0.61956
Sf1	9	0.0080371	0.760174	189	-1.5667	0.95236	1	18010	-1.5667
Fubp1	10	0.0082171	0.760174	190	-0.99839	0.83561	1	15484	-0.99839
Diap1	10	0.0082629	0.760174	191	-0.45252	0.98023	1	18634	-0.45252
Spata31	9	0.0081141	0.760174	192	-1.1666	0.87595	1	16408	-1.1666
Tm9sf1	10	0.0083154	0.760174	193	-1.0252	0.98078	1	18642	-1.0252
Fbxw13	10	0.0083581	0.760174	194	-0.02114	0.81927	1	15120	-0.02114
1700017N19Rik	9	0.0082129	0.760174	195	-1.0062	0.87112	1	16302	-1.0062
Bad	10	0.0083981	0.760174	196	-1.4561	0.56041	1	10134	-1.4561
C2cd4c	10	0.0084137	0.760174	197	-0.72045	0.53766	1	9766	-0.72045
Paqr7	10	0.0084418	0.760174	198	-0.052118	0.62403	1	11355	-0.052118
Gpkow	8	0.0076367	0.760174	199	-1.0485	0.53486	1	10380	-1.0485
Rfx6	10	0.0085697	0.760174	200	-1.0216	0.68048	1	12472	-1.0216
Slc4a10	10	0.0085765	0.760174	201	-1.1975	0.96337	1	18239	-1.1975
Hist2h3c1	10	0.0086696	0.760174	202	-1.1079	0.57192	1	10353	-1.1079
Hist2h3c2	10	0.0086696	0.760174	203	-1.1079	0.57192	1	10354	-1.1079
Csf3	9	0.008564	0.760174	204	-1.5696	0.26276	1	4914	-1.5696
Dyrk4	9	0.0085942	0.760174	205	-1.1131	0.99879	1	19002	-1.1131
2310044G17Rik	10	0.0088262	0.760174	206	-1.2589	0.99551	1	18946	-1.2589
Dbr1	10	0.0088381	0.760174	207	0.9263	0.023512	0.741009	591	0.9263
Slc37a2	9	0.0087071	0.760174	208	-0.88741	0.80612	1	15141	-0.88741
Sntb2	9	0.0087104	0.760174	209	-1.8343	0.7566	1	14262	-1.8343
Iqcf5	10	0.0088543	0.760174	210	-0.98464	0.866	1	16150	-0.98464
Ndrg1	10	0.0089193	0.760174	211	-0.55093	0.8209	1	15155	-0.55093
Luzp1	8	0.0081022	0.760174	212	-1.4609	0.68495	1	13187	-1.4609
Braf	8	0.008111	0.760174	213	-1.4885	0.90037	1	17244	-1.4885
Zfp647	9	0.008873	0.760174	214	-1.4658	0.93173	1	17596	-1.4658
Cyp2ab1	10	0.0090373	0.760174	215	-0.020819	0.41237	1	7576	-0.020819
Gm16432	9	0.0089281	0.760174	216	-1.1435	0.57526	1	10821	-1.1435
1700129C05Rik	9	0.008964	0.760174	217	-1.6242	0.72956	1	13552	-1.6242
Magix	9	0.0090519	0.760174	218	-0.57481	0.95577	1	18089	-0.57481
Myo6	10	0.0091954	0.767739	219	-0.79627	0.28769	1	5221	-0.79627
Ywhae	8	0.0083841	0.760174	220	-1.5146	0.32975	1	6372	-1.5146
Cadm4	10	0.0093354	0.772643	221	-0.4336	0.97261	1	18462	-0.4336
Pcdhb14	8	0.0084766	0.760174	222	-1.4935	0.95629	1	18099	-1.4935
Ctps2	9	0.0092573	0.769532	223	-1.0225	0.6066	1	11322	-1.0225
Ddx21	6	0.0075748	0.760174	224	-0.79927	0.74818	1	15281	-0.79927
Pqlc1	10	0.0094586	0.779457	225	-0.28002	0.7923	1	14532	-0.28002
Thy1	10	0.0095268	0.781687	226	-1.2032	0.97916	1	18605	-1.2032
Supt16	8	0.0086863	0.760174	227	-1.1173	0.15857	1	3071	-1.1173
Lix1	10	0.0096303	0.783069	228	-0.43597	0.1533	1	2843	-0.43597
Gja4	8	0.0087419	0.760174	229	-1.2019	0.75925	1	14602	-1.2019
2010015L04Rik	10	0.0096448	0.783069	230	-0.56127	0.8801	1	16417	-0.56127
Zcchc24	9	0.0097135	0.783069	231	-1.3045	0.99976	1	19030	-1.3045
Piezo2	10	0.009799	0.783069	232	-0.069481	0.019624	0.718829	504	-0.069481
Snapin	8	0.0089177	0.760174	233	-1.0704	0.99234	1	18882	-1.0704
Sap130	8	0.0090098	0.760174	234	-0.91306	0.86986	1	16843	-0.91306
Pparg	9	0.0098316	0.783069	235	-0.65155	0.2775	1	5212	-0.65155
Zeb1	9	0.0098846	0.784014	236	-0.69663	0.54276	1	10227	-0.69663
Agbl1	9	0.01018	0.804096	237	-1.0475	0.91529	1	17302	-1.0475
Phf12	10	0.010356	0.806548	238	-0.74563	0.91642	1	17040	-0.74563
Chd2	7	0.008874	0.760174	239	-1.3567	0.83963	1	16652	-1.3567
Ces2a	9	0.010405	0.806548	240	-0.7241	0.67969	1	12562	-0.7241
Lrr1	9	0.010405	0.806548	241	0.31178	0.33109	1	6298	0.31178
Kif5a	9	0.010423	0.806548	242	-1.5706	0.31483	1	6007	-1.5706
BC089491	9	0.010529	0.811342	243	-1.4203	0.91067	1	17218	-1.4203
Psip1	10	0.01057	0.811342	244	-1.2307	0.91985	1	17126	-1.2307
Ugt2b37	7	0.0090649	0.760174	245	-0.64515	0.79932	1	15713	-0.64515
BC021785	9	0.010625	0.812299	246	-1.1502	0.99425	1	18918	-1.1502
Per3	8	0.0097176	0.783069	247	-0.91099	0.13055	0.975695	2634	-0.91099
Ksr1	9	0.010707	0.814031	248	0.37152	0.50074	1	9336	0.37152
Havcr2	10	0.010733	0.814031	249	-0.63264	0.12317	0.963657	2351	-0.63264
Casp14	9	0.010975	0.825885	250	-1.2345	0.99081	1	18837	-1.2345
Rassf3	10	0.011073	0.825885	251	0.80345	0.042345	0.830159	939	0.80345
Wdr73	10	0.011106	0.825885	252	-0.47763	0.36254	1	6614	-0.47763
Gm4937	10	0.01115	0.825885	253	-1.0135	0.4278	1	7866	-1.0135
Ppef2	10	0.011367	0.830111	254	-1.334	0.98718	1	18770	-1.334
Gm428	7	0.0097754	0.783069	255	-1.0924	0.50467	1	9944	-1.0924
Tmem229b	10	0.011432	0.830111	256	-0.15751	0.37944	1	6946	-0.15751
4921507P07Rik	9	0.011512	0.830111	257	-0.87549	0.8037	1	15097	-0.87549
Fxyd5	9	0.011538	0.830111	258	-1.1544	0.95811	1	18129	-1.1544
Adarb2	10	0.011577	0.830111	259	-1.1944	0.75095	1	13715	-1.1944
Gfod1	9	0.011736	0.830111	260	-0.63565	0.91228	1	17249	-0.63565
Lrrc1	10	0.011689	0.830111	261	-1.1416	0.19531	1	3586	-1.1416
Orm3	10	0.011697	0.830111	262	-0.62381	0.19049	1	3501	-0.62381
H2-M10.3	9	0.011824	0.830111	263	-1.4396	0.95437	1	18058	-1.4396
Gid8	10	0.011748	0.830111	264	-1.1353	0.89362	1	16609	-1.1353
Cyp27a1	10	0.011837	0.830111	265	-0.72028	0.84264	1	15646	-0.72028
Cul2	9	0.011943	0.830111	266	-1.4113	0.99962	1	19024	-1.4113
Ube2e1	9	0.011947	0.830111	267	-1.2044	0.1868	1	3505	-1.2044
Psma6	10	0.011889	0.830111	268	-0.14516	0.83586	1	15488	-0.14516
Krtap21-1	10	0.011948	0.830111	269	0.46617	0.54373	1	9864	0.46617
Cenpv	7	0.010287	0.806548	270	-0.16351	0.77621	1	15029	-0.16351
Acaa1b	9	0.012098	0.831415	271	-0.97278	0.82624	1	15507	-0.97278
Gmfb	10	0.01204	0.83084	272	0.038745	0.93141	1	17402	0.038745
Slc6a8	10	0.012046	0.83084	273	-1.1681	0.99749	1	18977	-1.1681
Trim29	8	0.011044	0.825885	274	-1.0351	0.92489	1	17578	-1.0351
Cd3eap	9	0.012154	0.832235	275	-0.060384	0.37252	1	7018	-0.060384
D19Ertd737e	9	0.012413	0.838885	276	-1.2031	0.98146	1	18655	-1.2031
Acot2	10	0.012362	0.838885	277	-0.10864	0.70193	1	12877	-0.10864
Gm13286	9	0.012431	0.838885	278	-0.97577	0.86278	1	16173	-0.97577
Bex1	10	0.012544	0.838885	279	-1.0753	0.75983	1	13871	-1.0753
Zkscan3	9	0.012637	0.838885	280	-1.0687	0.77797	1	14652	-1.0687
Gm9112	9	0.012642	0.838885	281	-1.0363	0.85812	1	16090	-1.0363
Odf2	9	0.012692	0.838885	282	-1.2638	0.53242	1	10001	-1.2638
1700039E15Rik	9	0.012692	0.838885	283	-0.64442	0.30016	1	5718	-0.64442
Kbtbd4	10	0.012639	0.838885	284	-0.97088	0.92258	1	17194	-0.97088
Ankrd11	10	0.012692	0.838885	285	-0.89085	0.97735	1	18565	-0.89085
Cdk2	8	0.011784	0.830111	286	-1.1283	0.83884	1	15999	-1.1283
Htra3	9	0.012961	0.84012	287	-0.87447	0.79149	1	14887	-0.87447
Hgfac	9	0.012999	0.84012	288	0.74564	0.049297	0.86251	1101	0.74564
Tmf1	10	0.012882	0.84012	289	-1.2048	0.97736	1	18566	-1.2048
Jun	9	0.013027	0.84012	290	-0.87174	0.64313	1	11968	-0.87174
Mageb18	9	0.013136	0.84012	291	-0.73309	0.60278	1	11266	-0.73309
Dsn1	10	0.012993	0.84012	292	-0.0031892	0.094021	0.941808	1862	-0.0031892
Qrfpr	8	0.011925	0.830111	293	-1.3647	0.67197	1	12856	-1.3647
Tmem42	7	0.011132	0.825885	294	-0.40125	0.41766	1	8489	-0.40125
Prl3d3	10	0.013106	0.84012	295	0.22186	0.4616	1	8514	0.22186
Prl3d2	10	0.013106	0.84012	296	-0.26467	0.44083	1	8134	-0.26467
Casp6	9	0.013284	0.84012	297	-0.32913	0.79806	1	15007	-0.32913
Ipp	10	0.013151	0.84012	298	-1.217	0.93633	1	17535	-1.217
1700020L24Rik	10	0.013171	0.84012	299	-1.2491	0.70601	1	12951	-1.2491
Mfsd6l	10	0.01321	0.84012	300	-0.98697	0.75309	1	13742	-0.98697
Krtap9-1	10	0.013256	0.84012	301	-1.062	0.21569	1	3990	-1.062
Gucy2f	9	0.013561	0.848904	302	-1.0397	0.89239	1	16890	-1.0397
Pwwp2b	10	0.013485	0.848904	303	-0.84309	0.36558	1	6659	-0.84309
Stat6	10	0.013521	0.848904	304	-0.12654	0.6079	1	11051	-0.12654
Tdpoz2	9	0.013708	0.849985	305	-1.5584	0.99924	1	19017	-1.5584
Stk19	10	0.013683	0.849985	306	-1.1361	0.93738	1	17558	-1.1361
Lrch3	9	0.013845	0.853231	307	-0.94804	0.50933	1	9521	-0.94804
Serpinb9b	9	0.01385	0.853231	308	-1.2968	0.80015	1	15042	-1.2968
Yrdc	9	0.013996	0.855096	309	0.81446	0.2369	1	4376	0.81446
6430571L13Rik	10	0.013993	0.855096	310	-0.62097	0.84536	1	15694	-0.62097
Ugt1a2	9	0.014098	0.855096	311	-0.86287	0.36286	1	6831	-0.86287
Epb4.1l4b	9	0.014105	0.855096	312	-0.74513	0.73966	1	13812	-0.74513
Rpl7a	9	0.014297	0.862613	313	-1.3332	0.71973	1	13319	-1.3332
Ccdc19	10	0.014377	0.862613	314	-0.40659	0.80841	1	14890	-0.40659
Nckipsd	9	0.014439	0.862613	315	-1.5631	0.84013	1	15754	-1.5631
Vwa1	9	0.014537	0.862613	316	-1.0542	0.97509	1	18512	-1.0542
Scp2d1	9	0.014577	0.862613	317	-1.1615	0.82079	1	15405	-1.1615
Tldc2	9	0.01463	0.862613	318	-0.43865	0.17358	1	3285	-0.43865
Nkain2	10	0.014671	0.862613	319	-0.32668	0.47308	1	8733	-0.32668
Nefm	9	0.014686	0.862613	320	-0.2565	0.36263	1	6825	-0.2565
Abhd2	10	0.014762	0.862613	321	-1.2002	0.95469	1	18017	-1.2002
Ccdc53	9	0.014773	0.862613	322	-0.58083	0.63478	1	11817	-0.58083
Tspo	10	0.014856	0.862613	323	-0.97119	0.78195	1	14290	-0.97119
Ceacam1	9	0.014907	0.862613	324	-1.2379	0.3554	1	6696	-1.2379
Nans	10	0.014973	0.862613	325	-0.73616	0.55714	1	10069	-0.73616
4933402N03Rik	9	0.014973	0.862613	326	-1.0815	0.84458	1	15840	-1.0815
Vstm2a	10	0.015035	0.862613	327	-1.187	0.85416	1	15900	-1.187
Tmem231	9	0.015004	0.862613	328	-1.1354	0.96885	1	18371	-1.1354
Dbf4	10	0.015128	0.862613	329	-0.60808	0.39909	1	7340	-0.60808
Slc4a4	9	0.015105	0.862613	330	-0.71447	0.78349	1	14753	-0.71447
Snrnp40	9	0.01518	0.862613	331	0.4332	0.18759	1	3523	0.4332
Gapt	10	0.015268	0.863105	332	-0.3913	0.25988	1	4755	-0.3913
Lepre1	9	0.01528	0.863105	333	-0.14673	0.76158	1	14354	-0.14673
Safb2	9	0.015359	0.863363	334	0.17487	0.078498	0.920355	1600	0.17487
Ssx2ip	9	0.015408	0.863363	335	0.29796	0.28955	1	5481	0.29796
Lypd2	10	0.015513	0.863363	336	-1.0058	0.85802	1	15981	-1.0058
Cyp4f15	10	0.015515	0.863363	337	-0.3635	0.72846	1	13366	-0.3635
Fcgr2b	10	0.015551	0.863363	338	-0.32554	0.73505	1	13460	-0.32554
Cul4b	10	0.015557	0.863363	339	-1.1653	0.84642	1	15717	-1.1653
Tmem196	10	0.015836	0.872818	340	0.32094	0.18957	1	3484	0.32094
Prrc2c	7	0.013601	0.848904	341	-0.32482	0.85712	1	16896	-0.32482
Sox12	8	0.01479	0.862613	342	-0.56871	0.34687	1	6634	-0.56871
Mrc2	9	0.015864	0.872818	343	-0.3507	0.58872	1	11032	-0.3507
Derl2	10	0.016101	0.878848	344	-1.0727	0.71465	1	13133	-1.0727
Nyap1	10	0.016113	0.878848	345	-0.90988	0.65099	1	11908	-0.90988
Lsm6	9	0.016103	0.878848	346	0.35884	0.11133	0.958741	2245	0.35884
Dcun1d5	9	0.016199	0.881033	347	-0.92508	0.78059	1	14699	-0.92508
Kif24	7	0.014065	0.855096	348	-1.6526	0.83062	1	16503	-1.6526
Slc38a3	10	0.016527	0.882608	349	-1.1047	0.9145	1	16991	-1.1047
Tff2	10	0.016539	0.882608	350	-0.96759	0.93356	1	17472	-0.96759
C4bp	9	0.016325	0.882608	351	-1.0614	0.78172	1	14720	-1.0614
R3hcc1	9	0.016438	0.882608	352	-1.368	0.906	1	17145	-1.368
Rrp8	10	0.016697	0.882907	353	-1.2451	0.99142	1	18855	-1.2451
Zdhhc24	9	0.016514	0.882608	354	-1.2362	0.83961	1	15742	-1.2362
2610002J02Rik	9	0.016558	0.882608	355	-0.68028	0.95004	1	17955	-0.68028
Fasn	10	0.016829	0.883792	356	-1.3508	0.72457	1	13304	-1.3508
Nfyb	9	0.016645	0.882608	357	-1.2786	0.8626	1	16167	-1.2786
Pacsin2	9	0.016645	0.882608	358	-0.89116	0.93184	1	17600	-0.89116
Alpi	10	0.016944	0.883792	359	-1.2179	0.87103	1	16239	-1.2179
Phlda1	8	0.015721	0.869978	360	-0.93067	0.99493	1	18934	-0.93067
Fras1	10	0.017018	0.883792	361	0.22963	0.50941	1	9308	0.22963
Abca14	10	0.017026	0.883792	362	-0.66382	0.98408	1	18710	-0.66382
Rps3	10	0.017177	0.88852	363	-0.22819	0.47574	1	8778	-0.22819
Cytip	9	0.016933	0.883792	364	-0.94121	0.78273	1	14741	-0.94121
Calcoco1	10	0.017284	0.889256	365	-0.024186	0.42327	1	7778	-0.024186
Btnl9	9	0.017039	0.883792	366	0.60292	0.15432	1	2966	0.60292
Nmb	10	0.01753	0.892267	367	-1.1536	0.90555	1	16778	-1.1536
Ccnt2	9	0.017273	0.889256	368	-0.61774	0.97395	1	18487	-0.61774
Mid1	9	0.017385	0.892037	369	0.19188	0.059252	0.89034	1268	0.19188
Gm20877	8	0.016464	0.882608	370	-0.93483	0.40455	1	7793	-0.93483
Gigyf2	7	0.015173	0.862613	371	-0.31654	0.66597	1	13268	-0.31654
Rell1	9	0.017504	0.892267	372	-0.4403	0.76532	1	14416	-0.4403
9330159F19Rik	9	0.017507	0.892267	373	-0.19841	0.033288	0.809788	808	-0.19841
Gpr55	10	0.017946	0.900469	374	-0.72667	0.71308	1	13102	-0.72667
Dedd	10	0.017975	0.900469	375	-0.95311	0.57274	1	10372	-0.95311
3110021N24Rik	10	0.018042	0.901419	376	-0.71222	0.91927	1	17114	-0.71222
Fam65a	8	0.016796	0.883792	377	0.011584	0.59428	1	11243	0.011584
Tpm4	10	0.018163	0.905009	378	-1.3766	0.85435	1	15908	-1.3766
6430550D23Rik	10	0.018254	0.905009	379	-0.72222	0.80022	1	14711	-0.72222
Cdc20b	10	0.018267	0.905009	380	0.098585	0.30661	1	5558	0.098585
Aqp12	10	0.018314	0.905009	381	-0.96919	0.57461	1	10418	-0.96919
Pnpla1	9	0.017944	0.900469	382	-0.18355	0.52114	1	9772	-0.18355
Tmem2	9	0.017974	0.900469	383	-0.74328	0.99379	1	18911	-0.74328
Rgr	10	0.018415	0.905009	384	0.02886	0.43608	1	8036	0.02886
2810403A07Rik	10	0.018694	0.909287	385	-1.5327	0.90929	1	16857	-1.5327
Slc22a6	10	0.018695	0.909287	386	-0.10879	0.7922	1	14529	-0.10879
Sf3a2	10	0.018773	0.909317	387	-1.5989	0.38051	1	6966	-1.5989
1110001A16Rik	9	0.018415	0.905009	388	-1.0177	0.83758	1	15710	-1.0177
Pdcd1	8	0.017633	0.892761	389	3.2173	2.6006e-07	0.00165	3	3.2173
Plekhb2	8	0.017634	0.892761	390	-0.52864	0.96552	1	18297	-0.52864
Tgds	10	0.019097	0.914886	391	-0.69638	0.81129	1	14952	-0.69638
Xcl1	9	0.018656	0.909287	392	-0.89673	0.81924	1	15374	-0.89673
Fam171b	9	0.018725	0.909287	393	-0.68001	0.69124	1	12751	-0.68001
Ccdc94	10	0.019521	0.914886	394	-0.52009	0.58107	1	10550	-0.52009
Aox3	9	0.019027	0.914886	395	-1.1644	0.99904	1	19008	-1.1644
Hist2h3b	10	0.019577	0.914886	396	-1.1079	0.57192	1	10355	-1.1079
Fam46d	10	0.019579	0.914886	397	-0.58085	0.95855	1	18116	-0.58085
Tns4	10	0.019607	0.914886	398	-1.2625	0.66304	1	12135	-1.2625
Cenpm	10	0.019618	0.914886	399	-1.3869	0.9905	1	18831	-1.3869
Bckdha	10	0.019664	0.914886	400	-0.64251	0.90654	1	16799	-0.64251
Rnf10	9	0.019168	0.914886	401	-0.94278	0.78225	1	14734	-0.94278
Atp2b1	10	0.019819	0.914886	402	-0.62781	0.99439	1	18920	-0.62781
Dido1	10	0.01988	0.914886	403	-0.86782	0.94054	1	17638	-0.86782
Qser1	10	0.019885	0.914886	404	-0.57559	0.96836	1	18363	-0.57559
Fam195a	9	0.019335	0.914886	405	-1.3963	0.98058	1	18640	-1.3963
4930544D05Rik	9	0.019342	0.914886	406	-0.99844	0.34898	1	6606	-0.99844
H2-T23	10	0.019918	0.914886	407	-1.0829	0.82246	1	15191	-1.0829
1110012L19Rik	10	0.020038	0.914886	408	-1.0771	0.98001	1	18627	-1.0771
B3gat1	10	0.020081	0.914886	409	-1.4622	0.54773	1	9926	-1.4622
Trim38	10	0.020128	0.914886	410	-0.70551	0.47009	1	8680	-0.70551
Ccdc104	10	0.020152	0.914886	411	-0.82367	0.99809	1	18991	-0.82367
Crabp1	10	0.020247	0.914886	412	-0.5878	0.40058	1	7371	-0.5878
Necap2	9	0.019793	0.914886	413	-1.3669	0.98636	1	18756	-1.3669
Orc2	10	0.020432	0.914886	414	-0.58967	0.25045	1	4587	-0.58967
Slc6a9	10	0.020435	0.914886	415	0.53689	0.027747	0.770336	672	0.53689
Rab39b	10	0.020527	0.914886	416	-1.2762	0.96983	1	18396	-1.2762
Arap3	10	0.020653	0.914886	417	-1.069	0.83744	1	15533	-1.069
Prrt2	9	0.02	0.914886	418	-0.58432	0.51581	1	9663	-0.58432
Klrg1	8	0.019196	0.914886	419	-0.70063	0.99911	1	19011	-0.70063
Trib2	9	0.020023	0.914886	420	-1.4633	0.98392	1	18706	-1.4633
Pkd1l3	8	0.019209	0.914886	421	-1.3675	0.8881	1	17086	-1.3675
Ehbp1l1	10	0.020725	0.914886	422	-0.23922	0.39512	1	7256	-0.23922
Dpm1	9	0.020127	0.914886	423	-1.4409	0.88846	1	16811	-1.4409
Kcnj15	10	0.020825	0.914886	424	-1.2817	0.8864	1	16505	-1.2817
Phf2	10	0.020861	0.914886	425	-0.19438	0.67918	1	12446	-0.19438
Dpcr1	10	0.020878	0.914886	426	-0.95631	0.86259	1	16086	-0.95631
Snrnp70	9	0.020231	0.914886	427	1.2659	0.017888	0.714758	463	1.2659
Glp1r	10	0.020998	0.916784	428	0.16237	0.29402	1	5332	0.16237
4933413G19Rik	10	0.021145	0.918972	429	0.70995	0.059633	0.89034	1250	0.70995
Armc2	9	0.020464	0.914886	430	-0.63632	0.28807	1	5447	-0.63632
Cln6	9	0.020506	0.914886	431	-0.72499	0.83114	1	15609	-0.72499
Wipf1	10	0.021454	0.921186	432	-0.39906	0.22163	1	4096	-0.39906
Ttc21b	10	0.021566	0.921186	433	-0.34821	0.58613	1	10640	-0.34821
Ubr2	10	0.021574	0.921186	434	-0.46122	0.55761	1	10086	-0.46122
Prkcg	10	0.021574	0.921186	435	-0.52142	0.41763	1	7672	-0.52142
Metrn	10	0.021637	0.921186	436	-1.5189	0.55308	1	10010	-1.5189
Akt3	9	0.020906	0.914886	437	-0.10192	0.63581	1	11832	-0.10192
Nlrp4g	7	0.018446	0.905009	438	-1.5595	0.29237	1	5948	-1.5595
Ticrr	9	0.021112	0.918972	439	-1.2399	0.72091	1	13347	-1.2399
Brpf1	10	0.021975	0.921186	440	-0.97052	0.63627	1	11597	-0.97052
Esam	8	0.02041	0.914886	441	0.070349	0.62409	1	11683	0.070349
Tbcb	9	0.021223	0.920285	442	-0.56128	0.10381	0.946898	2093	-0.56128
Adam8	10	0.022135	0.921186	443	-0.87239	0.57996	1	10526	-0.87239
H2-M3	10	0.022169	0.921186	444	-0.51661	0.83415	1	15455	-0.51661
Snapc1	8	0.020604	0.914886	445	0.14863	0.68243	1	13127	0.14863
Npr2	9	0.021389	0.921186	446	-1.6021	0.56967	1	10723	-1.6021
Spink7	8	0.02062	0.914886	447	-0.81514	0.91321	1	17419	-0.81514
9830147E19Rik	8	0.020723	0.914886	448	-1.2817	0.74831	1	14438	-1.2817
Clca6	10	0.022398	0.921186	449	0.095403	0.95716	1	18085	0.095403
Cdcp1	9	0.021581	0.921186	450	-0.43335	0.74954	1	14090	-0.43335
2210404O07Rik	9	0.021601	0.921186	451	-1.1486	0.97833	1	18590	-1.1486
Phc2	10	0.022573	0.921186	452	-0.62746	0.83853	1	15557	-0.62746
Atp5c1	10	0.02261	0.921186	453	-0.72199	0.80687	1	14860	-0.72199
Rrh	10	0.022636	0.921186	454	-0.7451	0.95869	1	18119	-0.7451
Stxbp5l	9	0.021806	0.921186	455	-0.81381	0.68505	1	12653	-0.81381
Fam193a	9	0.021888	0.921186	456	-1.2958	0.83545	1	15680	-1.2958
Ube2r2	10	0.022899	0.921186	457	-0.23701	0.30947	1	5612	-0.23701
Cpxm1	10	0.023065	0.921186	458	-0.82316	0.97522	1	18517	-0.82316
Cluh	10	0.02323	0.921186	459	-0.75364	0.45193	1	8344	-0.75364
Apitd1	10	0.023259	0.921186	460	-1.4001	0.93417	1	17484	-1.4001
Clec2f	10	0.023328	0.921186	461	-1.1901	0.57803	1	10488	-1.1901
Ccdc60	9	0.022416	0.921186	462	-0.87437	0.47695	1	8811	-0.87437
Rnft2	9	0.022433	0.921186	463	-1.5365	0.71668	1	13234	-1.5365
Tmem165	10	0.023396	0.921186	464	-1.0976	0.96733	1	18339	-1.0976
Mettl8	10	0.023407	0.921186	465	-0.96109	0.62948	1	11465	-0.96109
Prph2	9	0.022474	0.921186	466	-0.96687	0.57441	1	10797	-0.96687
Gzmm	9	0.022525	0.921186	467	-0.67557	0.22796	1	4228	-0.67557
7530416G11Rik	10	0.02353	0.921186	468	0.1921	0.25115	1	4599	0.1921
Cntnap5b	10	0.023533	0.921186	469	-1.0309	0.90941	1	16860	-1.0309
Tmem29	10	0.023753	0.921186	470	-0.82081	0.95475	1	18019	-0.82081
Slc35a1	10	0.023878	0.921186	471	-0.24408	0.59441	1	10798	-0.24408
Tmem132e	8	0.02221	0.921186	472	-1.3578	0.62661	1	11728	-1.3578
Pdcd11	8	0.022212	0.921186	473	-0.10933	0.21349	1	4230	-0.10933
Tbc1d8	8	0.022217	0.921186	474	-1.6254	0.92272	1	17547	-1.6254
Insig1	10	0.023986	0.921186	475	-0.82542	0.12726	0.96955	2419	-0.82542
Clcn6	10	0.024092	0.921186	476	-0.24107	0.92578	1	17263	-0.24107
Onecut3	10	0.024133	0.921186	477	-0.89731	0.94023	1	17630	-0.89731
Gpr1	10	0.024177	0.921186	478	-0.89764	0.40735	1	7498	-0.89764
Msln	10	0.024219	0.921186	479	-0.99864	0.64676	1	11824	-0.99864
Lmcd1	10	0.024223	0.921186	480	-1.4069	0.92323	1	17207	-1.4069
Echs1	10	0.024232	0.921186	481	-1.0509	0.93257	1	17444	-1.0509
Atp10d	9	0.02323	0.921186	482	-1.0768	0.77122	1	14531	-1.0768
Erap1	10	0.024302	0.921186	483	-1.2348	0.53599	1	9736	-1.2348
Phldb3	8	0.022631	0.921186	484	-1.1009	0.94618	1	17887	-1.1009
BC016579	10	0.024457	0.921186	485	-0.69261	0.97831	1	18587	-0.69261
Pdia6	9	0.023426	0.921186	486	-1.2182	0.9921	1	18875	-1.2182
Foxj3	10	0.024499	0.921186	487	-0.34527	0.60595	1	11016	-0.34527
2010107G12Rik	10	0.0245	0.921186	488	-1.3613	0.41874	1	7700	-1.3613
Bub1b	9	0.023499	0.921186	489	-1.2211	0.77937	1	14678	-1.2211
Smurf1	10	0.024676	0.921186	490	-0.95896	0.68671	1	12580	-0.95896
Dnajc12	9	0.023586	0.921186	491	-1.367	0.99605	1	18954	-1.367
Csdc2	10	0.024693	0.921186	492	-0.11302	0.67719	1	12404	-0.11302
Ppp4c	10	0.024846	0.921186	493	-0.90927	0.79293	1	14543	-0.90927
Srrm2	9	0.023737	0.921186	494	-1.3743	0.92164	1	17420	-1.3743
Ddx51	8	0.023155	0.921186	495	-0.43889	0.041146	0.829251	975	-0.43889
Pde3b	8	0.023187	0.921186	496	-0.71383	0.30904	1	6055	-0.71383
Chd1	10	0.024922	0.921186	497	0.4905	0.04662	0.852203	1019	0.4905
Efcab1	8	0.023228	0.921186	498	-1.2019	0.65418	1	12401	-1.2019
Nobox	9	0.02382	0.921186	499	-0.045444	0.62494	1	11630	-0.045444
Hist2h2be	8	0.023291	0.921186	500	-0.41179	0.40646	1	7841	-0.41179
Mptx1	9	0.024015	0.921186	501	-0.82489	0.041569	0.829251	969	-0.82489
Mtch2	10	0.025211	0.921244	502	-0.09542	0.32612	1	5910	-0.09542
Peli1	10	0.025217	0.921244	503	-1.0205	0.53626	1	9744	-1.0205
Tmem258	9	0.024063	0.921186	504	-0.86244	0.98929	1	18810	-0.86244
Ets1	10	0.025426	0.921244	505	-1.0046	0.066973	0.907649	1364	-1.0046
Prpf40b	10	0.025463	0.921244	506	-1.153	0.41626	1	7646	-1.153
Sh2d2a	9	0.024262	0.921186	507	-0.91944	0.58685	1	11001	-0.91944
Tbl3	10	0.025493	0.921244	508	-1.1794	0.51439	1	9392	-1.1794
Gm4559	9	0.024379	0.921186	509	-0.85047	0.97668	1	18552	-0.85047
Npy	9	0.02442	0.921186	510	-1.3921	0.99481	1	18929	-1.3921
Notch3	10	0.025662	0.921244	511	-1.3539	0.587	1	10657	-1.3539
Art4	10	0.025919	0.921244	512	-0.013526	0.57138	1	10336	-0.013526
Krtap4-13	8	0.024158	0.921186	513	-1.5457	0.91349	1	17426	-1.5457
Fam132a	9	0.0247	0.921186	514	-1.6492	0.51732	1	9693	-1.6492
Dnase1l3	10	0.025983	0.921244	515	-0.69894	0.80222	1	14758	-0.69894
Cdnf	10	0.026014	0.921244	516	-1.1136	0.99919	1	19016	-1.1136
Abcb1a	10	0.026054	0.921244	517	0.029609	0.23222	1	4286	0.029609
Dctd	9	0.024763	0.921186	518	-0.57139	0.16121	1	3080	-0.57139
Pmp2	9	0.024883	0.921186	519	-0.79038	0.53407	1	10036	-0.79038
2210016L21Rik	9	0.024902	0.921186	520	-0.67759	0.43318	1	8071	-0.67759
Faf2	10	0.026236	0.921244	521	-0.95174	0.9247	1	17239	-0.95174
Eif2b5	8	0.02448	0.921186	522	-0.82178	0.062232	0.898552	1384	-0.82178
Rbm5	10	0.026282	0.921244	523	-0.54715	0.12471	0.966749	2376	-0.54715
Ptpn14	8	0.024515	0.921186	524	-0.77535	0.25795	1	5082	-0.77535
Cyp2j9	10	0.026327	0.921244	525	-0.30177	0.72218	1	13266	-0.30177
Rgs1	10	0.026353	0.921244	526	-1.0076	0.79392	1	14564	-1.0076
Tlx2	10	0.026407	0.921244	527	-1.209	0.67377	1	12343	-1.209
Klhdc7b	9	0.025119	0.921244	528	-1.0598	0.94116	1	17788	-1.0598
Rit2	9	0.025183	0.921244	529	-0.7516	0.97658	1	18550	-0.7516
Cdk6	10	0.026507	0.921244	530	-1.1582	0.82854	1	15331	-1.1582
Gm10696	10	0.026527	0.921244	531	-0.62761	0.89321	1	16605	-0.62761
Gm44	9	0.025231	0.921244	532	-1.0673	0.41467	1	7739	-1.0673
Eea1	10	0.026611	0.921244	533	-0.59944	0.66726	1	12216	-0.59944
Bpifb9b	10	0.026643	0.921244	534	-1.0693	0.26261	1	4797	-1.0693
Amacr	10	0.02667	0.921244	535	-1.0436	0.96595	1	18308	-1.0436
Ppt2	7	0.022686	0.921186	536	-1.2659	0.46315	1	9272	-1.2659
Trat1	9	0.025461	0.921244	537	-1.3177	0.98146	1	18654	-1.3177
Mmp11	10	0.026856	0.921244	538	-0.36266	0.23279	1	4296	-0.36266
Chd5	9	0.02554	0.921244	539	0.56677	0.18508	1	3474	0.56677
Gm11127	9	0.025608	0.921244	540	0.26786	0.26706	1	5005	0.26786
Col8a2	8	0.025233	0.921244	541	-1.3428	0.67749	1	12989	-1.3428
Sdc3	9	0.025706	0.921244	542	-0.74699	0.91412	1	17283	-0.74699
Gse1	8	0.025323	0.921244	543	-0.46559	0.80878	1	15324	-0.46559
Cxcr6	9	0.025868	0.921244	544	-0.70133	0.38581	1	7251	-0.70133
Eral1	9	0.025868	0.921244	545	-0.44794	0.61334	1	11430	-0.44794
4930452B06Rik	10	0.027278	0.921244	546	-0.6071	0.59451	1	10801	-0.6071
Pitpnm2	10	0.027381	0.921244	547	-0.99712	0.0066578	0.560889	218	-0.99712
Prl7a1	9	0.026017	0.921244	548	-0.84932	0.87514	1	16376	-0.84932
Tmem39b	10	0.027451	0.921244	549	0.27596	0.26834	1	4895	0.27596
BC049352	10	0.027566	0.921244	550	-0.93823	0.52401	1	9554	-0.93823
Slc35a3	10	0.027579	0.921244	551	-0.88432	0.97884	1	18600	-0.88432
Tmem260	9	0.026225	0.921244	552	-0.648	0.76562	1	14421	-0.648
Myo15	10	0.027738	0.921244	553	-0.21284	0.17726	1	3256	-0.21284
Plekhm1	10	0.027838	0.921244	554	-1.1206	0.95029	1	17884	-1.1206
Grtp1	9	0.026412	0.921244	555	-0.92681	0.90217	1	17073	-0.92681
Tgm3	10	0.028014	0.921244	556	0.6989	0.31651	1	5740	0.6989
Specc1l	10	0.028231	0.921244	557	0.13891	0.076158	0.916026	1555	0.13891
Muc5ac	10	0.028231	0.921244	558	-0.7562	0.93126	1	17401	-0.7562
Gtf2h5	10	0.028294	0.921244	559	0.29922	0.089385	0.934066	1786	0.29922
Akirin1	10	0.028436	0.921244	560	-0.48237	0.59401	1	10793	-0.48237
B3gnt3	10	0.028438	0.921244	561	0.33816	0.34165	1	6235	0.33816
Angpt2	9	0.026966	0.921244	562	-0.40287	0.66267	1	12282	-0.40287
Cers4	10	0.028518	0.921244	563	-0.52226	0.19479	1	3578	-0.52226
Fam3a	10	0.028592	0.921244	564	-1.0274	0.74459	1	13616	-1.0274
Slc38a10	9	0.027114	0.921244	565	-1.0336	0.91823	1	17352	-1.0336
Prkg1	9	0.027154	0.921244	566	-0.20884	0.6839	1	12630	-0.20884
Sppl2b	9	0.027154	0.921244	567	-0.52229	0.43423	1	8095	-0.52229
Wfdc2	10	0.028873	0.921244	568	-0.73861	0.97174	1	18447	-0.73861
Zfp120	9	0.027331	0.921244	569	-1.1164	0.5123	1	9595	-1.1164
Bach2	7	0.024675	0.921186	570	-0.89952	0.80258	1	15817	-0.89952
Slc1a5	9	0.027493	0.921244	571	-1.3306	0.92539	1	17497	-1.3306
1600014C23Rik	10	0.029082	0.921244	572	-0.060553	0.61439	1	11170	-0.060553
Naa60	9	0.027721	0.921244	573	-1.1345	0.95357	1	18042	-1.1345
Zbtb40	9	0.027727	0.921244	574	-0.42763	0.73186	1	13613	-0.42763
Kif13a	9	0.027839	0.921244	575	-0.87016	0.99805	1	18990	-0.87016
Bspry	10	0.029456	0.921244	576	-0.99891	0.98833	1	18790	-0.99891
Cdk11b	9	0.027873	0.921244	577	-1.1777	0.414	1	7728	-1.1777
Syngr3	10	0.029587	0.921244	578	0.65322	0.099169	0.943056	1949	0.65322
Dfna5	10	0.02962	0.921244	579	-1.2837	0.58506	1	10626	-1.2837
Efna1	9	0.02804	0.921244	580	-0.15742	0.87025	1	16283	-0.15742
Mfsd3	10	0.029674	0.921244	581	-1.0619	0.99386	1	18912	-1.0619
Endou	10	0.029893	0.921244	582	-1.0767	0.38839	1	7128	-1.0767
Wnk2	9	0.028242	0.921244	583	-0.24943	0.98563	1	18737	-0.24943
Glra1	10	0.02993	0.921244	584	-0.80168	0.996	1	18952	-0.80168
Simc1	10	0.029937	0.921244	585	-0.79869	0.18059	1	3323	-0.79869
4930503L19Rik	10	0.029975	0.921244	586	-0.78757	0.92587	1	17267	-0.78757
Atp5s	10	0.029978	0.921244	587	-0.5932	0.67881	1	12440	-0.5932
Alg6	10	0.030006	0.921244	588	-0.84956	0.93648	1	17536	-0.84956
Rps15a	6	0.023644	0.921186	589	-1.7737	0.47665	1	9996	-1.7737
Ppm1g	10	0.030059	0.921244	590	-0.79351	0.4674	1	8622	-0.79351
Prrc2a	10	0.030137	0.921244	591	0.22519	0.22066	1	4073	0.22519
Gpr35	10	0.030204	0.921244	592	-0.21206	0.64561	1	11802	-0.21206
Ptpn11	9	0.028545	0.921244	593	-0.067504	0.75947	1	14313	-0.067504
Ube2q2	9	0.028644	0.921244	594	-0.97287	0.54358	1	10245	-0.97287
Il6ra	10	0.030415	0.921244	595	-0.88941	0.67137	1	12302	-0.88941
Acap1	9	0.028728	0.921244	596	-0.54251	0.48424	1	8972	-0.54251
BC048546	10	0.030448	0.921244	597	0.042024	0.33598	1	6105	0.042024
Mroh4	9	0.028803	0.921244	598	-1.2554	0.69259	1	12773	-1.2554
Ssna1	10	0.030591	0.921244	599	-0.91403	0.61238	1	11140	-0.91403
B4galnt3	9	0.028944	0.921244	600	0.46334	0.40939	1	7647	0.46334
Mrap	10	0.030754	0.921244	601	-0.69132	0.49406	1	9072	-0.69132
Memo1	10	0.030765	0.921244	602	-0.10138	0.51685	1	9423	-0.10138
Eif4enif1	10	0.030839	0.921244	603	-0.65511	0.94084	1	17649	-0.65511
Mocs1	10	0.030854	0.921244	604	-0.93532	0.95332	1	17971	-0.93532
Pitpna	10	0.030889	0.921244	605	-0.66678	0.73936	1	13532	-0.66678
Osbpl5	10	0.030918	0.921244	606	-0.63965	0.98628	1	18755	-0.63965
Cdon	10	0.030971	0.921244	607	-0.62851	0.22067	1	4075	-0.62851
Prodh2	10	0.031028	0.921244	608	-0.52165	0.82735	1	15304	-0.52165
Misp	10	0.031086	0.921244	609	-1.204	0.57728	1	10467	-1.204
Gm16390	10	0.031092	0.921244	610	-0.45684	0.82213	1	15185	-0.45684
Sun5	10	0.031291	0.921244	611	-0.96351	0.43254	1	7964	-0.96351
Crb1	9	0.029554	0.921244	612	-1.0379	0.99714	1	18975	-1.0379
Gstm3	9	0.029564	0.921244	613	-1.1458	0.9506	1	17973	-1.1458
Zfp345	9	0.029565	0.921244	614	-0.19965	0.91518	1	17300	-0.19965
Npm1	10	0.031411	0.921244	615	0.43315	0.15215	1	2824	0.43315
Sema3d	9	0.029577	0.921244	616	-0.26256	0.79795	1	15001	-0.26256
3010026O09Rik	10	0.031438	0.921244	617	-0.60757	0.50882	1	9303	-0.60757
Cenpk	10	0.031493	0.921244	618	-1.1479	0.79566	1	14606	-1.1479
Foxh1	10	0.031521	0.921244	619	-0.94507	0.93744	1	17559	-0.94507
Aldh6a1	10	0.031545	0.921244	620	-0.98161	0.92995	1	17367	-0.98161
Cfl2	10	0.031565	0.921244	621	-0.96389	0.96755	1	18344	-0.96389
Plekha1	10	0.031566	0.921244	622	0.35869	0.46931	1	8664	0.35869
Ptpn2	9	0.029714	0.921244	623	-0.42576	0.83075	1	15602	-0.42576
Mbd3l2	10	0.031602	0.921244	624	-0.88249	0.60008	1	10908	-0.88249
Mpi	9	0.029844	0.921244	625	-0.28126	0.75596	1	14244	-0.28126
Lilra5	10	0.031953	0.921244	626	-0.92444	0.99218	1	18877	-0.92444
Zc3h8	8	0.029444	0.921244	627	0.67009	0.016936	0.714758	484	0.67009
Mbd3	10	0.032167	0.921244	628	-0.73378	0.76964	1	14060	-0.73378
Ebag9	10	0.032222	0.921244	629	-1.022	0.98626	1	18753	-1.022
Cts6	9	0.030316	0.921244	630	-0.19919	0.48088	1	8895	-0.19919
Dusp1	10	0.032239	0.921244	631	-0.15248	0.33272	1	6041	-0.15248
Ap1b1	10	0.032403	0.921244	632	-0.45395	0.58995	1	10713	-0.45395
Sh3bgr	10	0.032583	0.921244	633	-0.9002	0.61075	1	11110	-0.9002
C3ar1	9	0.030701	0.921244	634	-0.13944	0.339	1	6431	-0.13944
Lamp3	10	0.032641	0.921244	635	-0.72509	0.74497	1	13622	-0.72509
Hes7	10	0.032668	0.921244	636	-0.69026	0.41763	1	7673	-0.69026
Amer1	10	0.032668	0.921244	637	-0.53969	0.84731	1	15737	-0.53969
Gpr31b	10	0.032668	0.921244	638	-0.80231	0.33595	1	6104	-0.80231
Sncb	10	0.032668	0.921244	639	-0.96488	0.91258	1	16944	-0.96488
Sapcd2	9	0.030896	0.921244	640	-1.018	0.92714	1	17527	-1.018
Cd37	9	0.030897	0.921244	641	-1.6858	0.74539	1	13971	-1.6858
Zfp3	9	0.030899	0.921244	642	-1.3677	0.93153	1	17590	-1.3677
Rbbp4	10	0.032909	0.921244	643	-0.95833	0.79396	1	14565	-0.95833
Fn3krp	9	0.031053	0.921244	644	-1.277	0.97618	1	18544	-1.277
Krt2	10	0.03301	0.921244	645	-0.99384	0.9877	1	18778	-0.99384
Ogfod1	10	0.033079	0.921244	646	-1.3383	0.38523	1	7064	-1.3383
Zfp58	9	0.031172	0.921244	647	0.23754	0.29025	1	5491	0.23754
Ankef1	10	0.033123	0.921244	648	-0.90255	0.43001	1	7913	-0.90255
Rcor1	10	0.033123	0.921244	649	0.27668	0.43521	1	8017	0.27668
Paqr4	9	0.031188	0.921244	650	-0.77306	0.93466	1	17665	-0.77306
Gm14725	10	0.033165	0.921244	651	0.21026	0.077171	0.919308	1571	0.21026
Pqlc3	10	0.033176	0.921244	652	-0.84788	0.93156	1	17409	-0.84788
Tram1	10	0.033201	0.921244	653	-0.81347	0.95983	1	18156	-0.81347
Zfp280b	9	0.031391	0.921244	654	0.02612	0.88342	1	16644	0.02612
Ryr2	10	0.033367	0.921244	655	-0.4792	0.71435	1	13123	-0.4792
Gapdhs	10	0.033511	0.921244	656	-1.0633	0.96747	1	18342	-1.0633
Triobp	9	0.031611	0.921244	657	0.78319	0.066189	0.907649	1372	0.78319
Grem2	10	0.033697	0.921244	658	-0.71792	0.62549	1	11387	-0.71792
Foxd4	9	0.031725	0.921244	659	-1.3543	0.89932	1	17021	-1.3543
Agpat9	10	0.033748	0.921244	660	-0.88106	0.99578	1	18949	-0.88106
Kcna1	10	0.033798	0.921244	661	-0.76046	0.81756	1	15088	-0.76046
Kif26b	9	0.031819	0.921244	662	-0.013921	0.72157	1	13357	-0.013921
Tada2a	10	0.033827	0.921244	663	0.005432	0.096121	0.941808	1900	0.005432
D1Pas1	9	0.031872	0.921244	664	-1.2785	0.30016	1	5720	-1.2785
Hmx1	9	0.031907	0.921244	665	0.44479	0.045631	0.84497	1038	0.44479
Tenc1	10	0.033961	0.921244	666	0.36368	0.3208	1	5814	0.36368
Hoxc12	10	0.034038	0.921244	667	-1.0189	0.97369	1	18483	-1.0189
Bcar3	10	0.034042	0.921244	668	-0.90489	0.15126	1	2805	-0.90489
Tssk6	9	0.032042	0.921244	669	-0.39232	0.47831	1	8841	-0.39232
Prkacb	10	0.034083	0.921244	670	-0.8883	0.91643	1	17041	-0.8883
Syncrip	7	0.028996	0.921244	671	-0.79168	0.96483	1	18283	-0.79168
Clip2	10	0.034203	0.921244	672	-0.97995	0.15629	1	2891	-0.97995
Actbl2	10	0.034235	0.921244	673	-0.21717	0.5573	1	10076	-0.21717
Dynlt1c	9	0.032239	0.921244	674	0.45785	0.44389	1	8247	0.45785
Dynlt1b	9	0.032239	0.921244	675	0.23995	0.42774	1	7966	0.23995
Dynlt1a	9	0.032239	0.921244	676	-1.3164	0.63893	1	11888	-1.3164
Mybl1	9	0.032263	0.921244	677	-0.67199	0.082142	0.920812	1678	-0.67199
Sfi1	9	0.032348	0.921244	678	-1.1544	0.57678	1	10847	-1.1544
Hpcal1	10	0.034535	0.922021	679	-0.73881	0.8836	1	16464	-0.73881
Gadd45a	10	0.034618	0.922948	680	-0.16326	0.10644	0.951576	2062	-0.16326
Srcin1	9	0.032604	0.921244	681	-1.199	0.74744	1	14039	-1.199
Prps2	9	0.032608	0.921244	682	-0.70837	0.30165	1	5750	-0.70837
Zscan29	9	0.032654	0.921244	683	-0.99628	0.32163	1	6142	-0.99628
Krtap13	10	0.034795	0.923761	684	-0.19155	0.57081	1	10326	-0.19155
Ifna12	10	0.034872	0.923761	685	-0.94856	0.66631	1	12199	-0.94856
Hecw2	9	0.032831	0.921244	686	-1.2101	0.36813	1	6933	-1.2101
Strada	10	0.034963	0.923761	687	-0.76771	0.95675	1	18073	-0.76771
Zfp804a	8	0.03193	0.921244	688	-0.45772	0.60768	1	11432	-0.45772
Secisbp2l	10	0.035137	0.92383	689	-0.82125	0.71759	1	13186	-0.82125
Xpnpep3	7	0.029781	0.921244	690	-1.3729	0.87198	1	17051	-1.3729
Nkapl	9	0.03313	0.921244	691	0.3552	0.49842	1	9278	0.3552
Saa1	10	0.035313	0.92383	692	-1.052	0.98385	1	18702	-1.052
Atp10b	10	0.03533	0.92383	693	-0.2132	0.67804	1	12419	-0.2132
Slc38a8	10	0.03538	0.92383	694	-0.42304	0.96738	1	18340	-0.42304
Tgif2lx2	9	0.033223	0.921244	695	-1.0323	0.99133	1	18851	-1.0323
Tgif2lx1	9	0.033223	0.921244	696	-1.0323	0.99133	1	18852	-1.0323
Zranb2	8	0.03223	0.921244	697	-0.11882	0.42348	1	8230	-0.11882
Derl3	10	0.035488	0.92383	698	-0.67956	0.19494	1	3579	-0.67956
Paip1	10	0.035515	0.92383	699	-1.1903	0.83504	1	15472	-1.1903
Cadps2	10	0.035542	0.92383	700	-1.0521	0.3236	1	5872	-1.0521
Slc22a1	9	0.033373	0.921244	701	-0.60154	0.68429	1	12639	-0.60154
Notch4	10	0.035607	0.92383	702	-0.12174	0.83184	1	15395	-0.12174
Pax2	9	0.033458	0.921244	703	-0.60656	0.40037	1	7509	-0.60656
Mmp21	10	0.035769	0.924614	704	-0.99556	0.73552	1	13470	-0.99556
Ankle2	9	0.033656	0.921244	705	-0.21827	0.62232	1	11582	-0.21827
Hmgcr	7	0.030412	0.921244	706	-0.91972	0.91879	1	17518	-0.91972
Mrgbp	9	0.033768	0.921244	707	-0.88619	0.95236	1	18013	-0.88619
Mcts1	10	0.035999	0.926834	708	-0.19591	0.2754	1	5020	-0.19591
Mdm2	9	0.033971	0.921244	709	-0.86421	0.94076	1	17781	-0.86421
Ocstamp	10	0.036212	0.926834	710	-1.2302	0.60397	1	10978	-1.2302
Golga2	9	0.033977	0.921244	711	-1.4061	0.80659	1	15153	-1.4061
Avil	8	0.032825	0.921244	712	-0.67099	0.23933	1	4720	-0.67099
Cd74	10	0.036275	0.926834	713	-0.7545	0.55698	1	10062	-0.7545
Zfp37	9	0.034059	0.921244	714	-1.2428	0.21545	1	4018	-1.2428
Ppy	9	0.034335	0.921244	715	-0.77696	0.90223	1	17074	-0.77696
Lrguk	9	0.03435	0.921244	716	-0.52507	0.74818	1	14056	-0.52507
Cpa1	10	0.036681	0.926834	717	-0.83901	0.80877	1	14897	-0.83901
Gm5382	9	0.034437	0.921244	718	-1.4896	0.71447	1	13176	-1.4896
Trp53tg5	9	0.034457	0.921244	719	0.16503	0.19184	1	3589	0.16503
Knop1	9	0.034457	0.921244	720	-0.55386	0.31273	1	5965	-0.55386
A730008H23Rik	7	0.031273	0.921244	721	1.0912	0.10074	0.946703	2194	1.0912
Kcna2	8	0.033346	0.921244	722	-0.49652	0.86389	1	16708	-0.49652
Wdr6	10	0.036998	0.926834	723	-1.309	0.70229	1	12888	-1.309
C7	10	0.037041	0.926834	724	-0.61617	0.4244	1	7803	-0.61617
Ghsr	9	0.034744	0.923761	725	-1.1799	0.066509	0.907649	1378	-1.1799
Atp6v1d	10	0.037192	0.926834	726	-0.055162	0.14537	0.993677	2718	-0.055162
Ap4b1	10	0.037195	0.926834	727	-0.84764	0.81571	1	15051	-0.84764
Fbln5	10	0.037247	0.926834	728	0.64516	0.024426	0.742772	613	0.64516
Sgms2	10	0.037316	0.926834	729	-0.94037	0.96036	1	18164	-0.94037
Cmas	9	0.034972	0.923761	730	-0.82172	0.87158	1	16312	-0.82172
Tor2a	9	0.035028	0.923761	731	-0.84825	0.9483	1	17917	-0.84825
BC051628	10	0.037399	0.926834	732	-0.52392	0.25617	1	4693	-0.52392
Syvn1	10	0.03746	0.926834	733	-0.51952	0.57775	1	10481	-0.51952
Hps5	9	0.035166	0.92383	734	-1.315	0.63838	1	11881	-1.315
Fancm	8	0.033888	0.921244	735	0.85362	0.12751	0.96955	2586	0.85362
Fryl	9	0.035282	0.92383	736	-1.0313	0.53144	1	9982	-1.0313
Blcap	10	0.037684	0.926834	737	-1.3541	0.82	1	15131	-1.3541
Rrp12	10	0.037692	0.926834	738	-0.91426	0.41033	1	7543	-0.91426
Exosc4	9	0.035335	0.92383	739	-0.80188	0.040448	0.826844	949	-0.80188
Thyn1	8	0.034035	0.921244	740	-0.047525	0.17151	1	3334	-0.047525
Zfp202	7	0.032014	0.921244	741	-1.1445	0.61412	1	12202	-1.1445
1700013G24Rik	8	0.034214	0.921244	742	-0.42323	0.81474	1	15407	-0.42323
1110034G24Rik	10	0.038035	0.926834	743	-0.88894	0.90979	1	16867	-0.88894
Cacng1	10	0.038049	0.926834	744	-0.4427	0.97319	1	18472	-0.4427
Xab2	9	0.03567	0.92383	745	-0.55248	0.25349	1	4716	-0.55248
Acox3	9	0.03567	0.92383	746	0.12104	0.35378	1	6671	0.12104
Psmb2	10	0.038141	0.926834	747	-0.18946	0.29874	1	5421	-0.18946
Hspb11	10	0.038252	0.926834	748	-0.89243	0.90363	1	16742	-0.89243
Tex19.1	9	0.035797	0.924614	749	-0.85882	0.88187	1	16596	-0.85882
Gak	10	0.038309	0.926834	750	-0.59088	0.59064	1	10728	-0.59088
Fam78b	10	0.038357	0.926834	751	-0.72264	0.94004	1	17624	-0.72264
Zfp831	7	0.032652	0.921244	752	-1.3888	0.98944	1	18813	-1.3888
Phyh	10	0.038592	0.926834	753	-0.75878	0.2352	1	4330	-0.75878
Tmem170	10	0.038603	0.926834	754	-1.0353	0.84011	1	15589	-1.0353
Abcb4	10	0.038821	0.926834	755	-0.8021	0.78238	1	14302	-0.8021
Adamtsl5	10	0.038845	0.926834	756	-0.34402	0.90661	1	16805	-0.34402
Fut4	9	0.036363	0.926834	757	-0.1822	0.88392	1	16660	-0.1822
Psmd14	10	0.038959	0.926834	758	-1.203	0.040333	0.826844	900	-1.203
Rabgap1	10	0.038972	0.926834	759	-0.5971	0.64152	1	11708	-0.5971
Clspn	8	0.034949	0.923761	760	0.79114	0.096013	0.941808	2026	0.79114
Rmdn1	9	0.036515	0.926834	761	-0.31413	0.78494	1	14773	-0.31413
Hsd3b2	9	0.036579	0.926834	762	-1.2128	0.53242	1	10003	-1.2128
Rae1	10	0.039116	0.926834	763	-0.87105	0.85346	1	15887	-0.87105
Dnali1	10	0.039178	0.926834	764	-1.1406	0.50041	1	9176	-1.1406
Erich1	10	0.03941	0.926834	765	-1.0871	0.89172	1	16580	-1.0871
Mlh1	9	0.036983	0.926834	766	0.040388	0.6988	1	12889	0.040388
Ncapd3	10	0.039531	0.926834	767	-0.42621	0.65365	1	11969	-0.42621
Cox6b2	10	0.039565	0.926834	768	-0.86343	0.73344	1	13432	-0.86343
Mrto4	10	0.039597	0.926834	769	-1.0111	0.82013	1	15135	-1.0111
Nrg3	9	0.037276	0.926834	770	-1.2176	0.71859	1	13288	-1.2176
Ddx47	10	0.039737	0.926834	771	0.61187	0.20773	1	3841	0.61187
Snx25	9	0.037305	0.926834	772	0.62702	0.21	1	3917	0.62702
Ephb2	10	0.040114	0.926834	773	-0.08545	0.51274	1	9365	-0.08545
Myo1h	9	0.037722	0.926834	774	-0.5938	0.94343	1	17825	-0.5938
Diexf	10	0.040269	0.926834	775	-1.1579	0.93464	1	17496	-1.1579
Gfm1	8	0.036222	0.926834	776	0.52936	0.20589	1	4069	0.52936
Ccz1	9	0.037939	0.926834	777	-0.89891	0.26736	1	5014	-0.89891
Nkiras1	10	0.040486	0.926834	778	-0.59875	0.95906	1	18131	-0.59875
Kazn	10	0.040543	0.926834	779	-0.088928	0.30311	1	5489	-0.088928
Cgnl1	9	0.038239	0.926834	780	-0.99578	0.57185	1	10761	-0.99578
Sycn	9	0.038324	0.926834	781	-0.87193	0.41174	1	7691	-0.87193
Zfp746	8	0.036564	0.926834	782	-1.1512	0.43627	1	8519	-1.1512
Usp50	9	0.03842	0.926834	783	-0.58169	0.044438	0.842556	1018	-0.58169
Ccdc110	9	0.038499	0.926834	784	-0.5994	0.80083	1	15057	-0.5994
Cpne4	10	0.04087	0.926834	785	-0.99182	0.26316	1	4812	-0.99182
Tor3a	10	0.040978	0.926834	786	-0.80239	0.80805	1	14881	-0.80239
Fam163b	8	0.036893	0.926834	787	-0.30374	0.069646	0.907649	1550	-0.30374
Cdc37l1	8	0.036896	0.926834	788	0.29303	0.41413	1	8023	0.29303
Elof1	10	0.041069	0.926834	789	-0.062305	0.78512	1	14365	-0.062305
Cttn	10	0.041109	0.926834	790	-0.88814	0.82354	1	15216	-0.88814
Dbil5	9	0.038809	0.926834	791	-0.80038	0.89182	1	16875	-0.80038
Pigz	8	0.037086	0.926834	792	-0.97361	0.74814	1	14434	-0.97361
Ehhadh	10	0.041237	0.926834	793	0.079926	0.83532	1	15479	0.079926
Epha10	9	0.038953	0.926834	794	-1.1028	0.98361	1	18695	-1.1028
Igflr1	10	0.041295	0.926834	795	-1.031	0.93916	1	17592	-1.031
Agr2	9	0.039021	0.926834	796	-0.66675	0.43318	1	8075	-0.66675
Gm11559	10	0.041354	0.926834	797	-1.0988	0.15722	1	2904	-1.0988
Arhgap31	10	0.041504	0.926834	798	-0.83619	0.8187	1	15111	-0.83619
En1	10	0.041504	0.926834	799	-0.67646	0.73476	1	13455	-0.67646
Zbtb7c	5	0.031758	0.921244	800	-1.2128	0.33161	1	7424	-1.2128
Seh1l	9	0.039241	0.926834	801	-0.34095	0.87909	1	16509	-0.34095
Reep3	9	0.039321	0.926834	802	-1.1651	0.74301	1	13895	-1.1651
Slc38a11	9	0.039344	0.926834	803	-0.92098	0.7111	1	13106	-0.92098
Zic1	8	0.037526	0.926834	804	-0.77392	0.70588	1	13607	-0.77392
Nub1	9	0.039396	0.926834	805	-0.12998	0.27025	1	5083	-0.12998
Rc3h1	8	0.037556	0.926834	806	-1.0869	0.85461	1	16499	-1.0869
Prss39	10	0.041709	0.926834	807	-0.96139	0.69509	1	12733	-0.96139
Bpifb9a	10	0.041717	0.926834	808	-0.33375	0.98101	1	18646	-0.33375
Gm14851	9	0.039471	0.926834	809	-0.76974	0.89203	1	16883	-0.76974
Champ1	10	0.041904	0.926834	810	-0.38352	0.72908	1	13377	-0.38352
Gm8787	10	0.041918	0.926834	811	-0.99992	0.85054	1	15820	-0.99992
Miox	10	0.041945	0.926834	812	-0.40877	0.59888	1	10892	-0.40877
Frg1	10	0.041972	0.926834	813	-0.29732	0.6246	1	11363	-0.29732
Syndig1	10	0.042101	0.926834	814	-0.743	0.88042	1	16420	-0.743
Gtf2b	10	0.042286	0.926834	815	0.59217	0.32964	1	5967	0.59217
G6pc	9	0.040046	0.926834	816	-0.77811	0.73736	1	13741	-0.77811
Soat2	8	0.038218	0.926834	817	-0.14555	0.97795	1	18583	-0.14555
Dmp1	10	0.042488	0.926834	818	-0.68131	0.26675	1	4870	-0.68131
Napsa	8	0.038304	0.926834	819	-1.1975	0.70153	1	13517	-1.1975
Styx	9	0.040352	0.926834	820	-0.8222	0.51293	1	9606	-0.8222
Efna5	8	0.03839	0.926834	821	-1.0239	0.4453	1	8718	-1.0239
Rem2	10	0.042616	0.926834	822	-1.0137	0.90275	1	16732	-1.0137
Sox4	10	0.042623	0.926834	823	0.2302	0.14538	0.993677	2719	0.2302
Mt4	9	0.040434	0.926834	824	-0.63813	0.81369	1	15279	-0.63813
Klk1b4	8	0.03843	0.926834	825	-0.99198	0.95012	1	17959	-0.99198
Nos1	10	0.042659	0.926834	826	-0.69121	0.56848	1	10266	-0.69121
Cdc42ep1	10	0.042726	0.926834	827	-0.18154	0.84995	1	15808	-0.18154
Aadacl2	9	0.040519	0.926834	828	-0.82126	0.84157	1	15783	-0.82126
Ppl	8	0.038534	0.926834	829	-1.1235	0.058568	0.888875	1317	-1.1235
Map3k8	10	0.042768	0.926834	830	-0.1429	0.40101	1	7377	-0.1429
Col27a1	8	0.038588	0.926834	831	-0.93227	0.7375	1	14280	-0.93227
Gbx1	9	0.04065	0.926834	832	-0.26843	0.81562	1	15319	-0.26843
4922501C03Rik	10	0.042904	0.926834	833	-0.34022	0.80587	1	14832	-0.34022
Prss50	10	0.042912	0.926834	834	-0.79648	0.9326	1	17446	-0.79648
Mroh2a	10	0.043077	0.926834	835	-1.0692	0.41465	1	7618	-1.0692
Gimap9	9	0.040885	0.926834	836	-0.90854	0.11844	0.961027	2387	-0.90854
4930522H14Rik	9	0.040915	0.926834	837	-0.29586	0.34601	1	6554	-0.29586
Tasp1	10	0.043125	0.926834	838	-1.1249	0.15199	1	2821	-1.1249
Csn1s2a	10	0.043177	0.926834	839	-0.86526	0.96331	1	18235	-0.86526
Gadd45gip1	10	0.043268	0.926834	840	0.45593	0.17977	1	3306	0.45593
Mlf2	10	0.043398	0.926834	841	-0.61905	0.19333	1	3554	-0.61905
Fez1	10	0.043431	0.926834	842	-1.2178	0.42647	1	7842	-1.2178
C1galt1c1	10	0.043435	0.926834	843	-1.0239	0.80573	1	14825	-1.0239
Szrd1	10	0.043448	0.926834	844	-0.48515	0.18409	1	3379	-0.48515
Sema4g	8	0.039218	0.926834	845	-1.2453	0.23744	1	4688	-1.2453
Proser2	10	0.043666	0.926834	846	-1.025	0.87747	1	16375	-1.025
D16Ertd472e	9	0.041547	0.926834	847	-0.1807	0.17164	1	3249	-0.1807
9630033F20Rik	10	0.043698	0.926834	848	-0.6122	0.72544	1	13321	-0.6122
Zdhhc7	9	0.041642	0.926834	849	-0.52934	0.44954	1	8359	-0.52934
Tanc2	9	0.041911	0.926834	850	-0.068521	0.543	1	10231	-0.068521
Epg5	10	0.044024	0.926834	851	-1.1184	0.98723	1	18771	-1.1184
Kank3	10	0.044043	0.926834	852	-1.0115	0.56489	1	10200	-1.0115
Adap1	10	0.04407	0.926834	853	-1.1693	0.89217	1	16586	-1.1693
Kcnj12	10	0.0441	0.926834	854	-0.76956	0.97081	1	18428	-0.76956
NC_47	4	0.029244	0.921244	855	-1.6384	0.8655	1	17046	-1.6384
Hoxd13	10	0.044115	0.926834	856	-0.80438	0.82562	1	15257	-0.80438
Prr18	9	0.042065	0.926834	857	0.29796	0.80784	1	15176	0.29796
Map9	10	0.044221	0.926834	858	-0.84592	0.91071	1	16893	-0.84592
Rcc2	10	0.044227	0.926834	859	-0.96908	0.31266	1	5669	-0.96908
Arhgef18	10	0.044266	0.926834	860	-1.0406	0.91493	1	17002	-1.0406
Uqcrh	8	0.039942	0.926834	861	-1.4261	0.068933	0.907649	1536	-1.4261
Gpr133	9	0.042203	0.926834	862	-0.616	0.47217	1	8744	-0.616
Fbp1	9	0.042241	0.926834	863	-1.1417	0.98632	1	18754	-1.1417
Atad1	10	0.044338	0.926834	864	-0.92479	0.5057	1	9249	-0.92479
Atp5g1	10	0.044369	0.926834	865	-0.4773	0.058788	0.888875	1233	-0.4773
Myh10	9	0.042298	0.926834	866	-0.72879	0.93226	1	17610	-0.72879
Defa2	9	0.042407	0.926834	867	-0.77154	0.9857	1	18739	-0.77154
Gm21002	9	0.042407	0.926834	868	-0.77154	0.9857	1	18738	-0.77154
Bola2	10	0.044504	0.926834	869	-0.69146	0.57463	1	10419	-0.69146
Usp20	10	0.044526	0.926834	870	-0.95922	0.99691	1	18969	-0.95922
Entpd1	9	0.042452	0.926834	871	-1.0291	0.94423	1	17842	-1.0291
Myh11	9	0.042714	0.926834	872	-0.9462	0.52764	1	9910	-0.9462
Klhl42	10	0.044789	0.926834	873	-1.0623	0.70193	1	12883	-1.0623
Dcdc2a	10	0.044861	0.926834	874	-0.88873	0.20205	1	3716	-0.88873
Musk	10	0.044992	0.926834	875	-0.92202	0.53444	1	9713	-0.92202
Ankrd33b	10	0.045028	0.926834	876	0.049007	0.84801	1	15750	0.049007
BC017643	10	0.045036	0.926834	877	0.32264	0.65414	1	11973	0.32264
Scube1	10	0.045053	0.926834	878	-0.91192	0.68119	1	12483	-0.91192
Mgat1	10	0.045075	0.926834	879	-0.78	0.41867	1	7697	-0.78
Scgb2b12	10	0.045101	0.926834	880	-1.1577	0.84624	1	15712	-1.1577
Med21	10	0.045111	0.926834	881	-1.0217	0.38806	1	7119	-1.0217
Papd4	9	0.043147	0.926834	882	-1.0449	0.33487	1	6357	-1.0449
Fam60a	10	0.045202	0.926834	883	-0.44801	0.33489	1	6091	-0.44801
Arntl2	9	0.043257	0.926834	884	-0.8943	0.92498	1	17487	-0.8943
Smg1	10	0.04532	0.926834	885	-1.1569	0.9191	1	17104	-1.1569
Zdhhc12	8	0.040892	0.926834	886	-0.91496	0.58161	1	11059	-0.91496
Nudt22	10	0.045399	0.926834	887	-0.56433	0.67745	1	12409	-0.56433
Stk3	10	0.045412	0.926834	888	-0.50165	0.79045	1	14488	-0.50165
Slc25a12	10	0.045451	0.926834	889	-0.57933	0.79206	1	14525	-0.57933
E130309F12Rik	10	0.045462	0.926834	890	0.59183	0.10273	0.946703	2002	0.59183
Orm2	9	0.043515	0.926834	891	-0.71687	0.90109	1	17056	-0.71687
Lrba	9	0.04355	0.926834	892	-1.3347	0.68901	1	12706	-1.3347
Stk32c	9	0.043635	0.926834	893	-0.68541	0.9941	1	18916	-0.68541
Zfp870	9	0.043687	0.926834	894	-0.97235	0.59797	1	11178	-0.97235
Rdm1	9	0.043687	0.926834	895	0.18757	0.30605	1	5845	0.18757
Kdm1a	10	0.045667	0.926834	896	-0.10565	0.19107	1	3516	-0.10565
Slc26a1	10	0.045758	0.926834	897	-0.10822	0.093883	0.941808	1860	-0.10822
Gp2	9	0.043817	0.926834	898	-0.75664	0.93252	1	17618	-0.75664
Dlg4	10	0.045895	0.926834	899	0.21815	0.39778	1	7315	0.21815
Auts2	9	0.044028	0.926834	900	-0.52026	0.53795	1	10129	-0.52026
Gm1979	5	0.035037	0.923761	901	-1.3623	0.78615	1	16377	-1.3623
Itga10	8	0.041569	0.926834	902	-0.57032	0.29268	1	5756	-0.57032
Ptgr1	8	0.041654	0.926834	903	-0.60041	0.94297	1	17833	-0.60041
Rp2h	9	0.044324	0.926834	904	-0.48282	0.20459	1	3829	-0.48282
Tubb5	9	0.044339	0.926834	905	0.225	0.32303	1	6172	0.225
Lrp2	9	0.04438	0.926834	906	-1.0105	0.49259	1	9160	-1.0105
Lect1	10	0.046331	0.926834	907	-0.41384	0.38176	1	6989	-0.41384
Adck4	9	0.04441	0.926834	908	-0.99909	0.62956	1	11716	-0.99909
Smpx	10	0.04636	0.926834	909	-1.0767	0.96139	1	18182	-1.0767
Ell3	10	0.046445	0.926834	910	-1.0635	0.60586	1	11014	-1.0635
Erbb4	9	0.044522	0.926834	911	-0.15378	0.22451	1	4167	-0.15378
Pmm2	10	0.046493	0.926834	912	-0.96142	0.12189	0.962106	2334	-0.96142
Atp6ap2	10	0.046539	0.926834	913	-0.93357	0.025827	0.754901	639	-0.93357
Cd84	10	0.046594	0.926834	914	-1.1646	0.57234	1	10362	-1.1646
Prokr1	9	0.044666	0.926834	915	-0.9458	0.99444	1	18922	-0.9458
Ndufa5	10	0.046635	0.926834	916	-0.94322	0.47308	1	8732	-0.94322
Mrps36	10	0.046777	0.926834	917	-1.0649	0.94892	1	17854	-1.0649
Zcchc9	8	0.042292	0.926834	918	-0.042359	0.55884	1	10743	-0.042359
Itm2c	10	0.046848	0.926834	919	-0.74183	0.76122	1	13888	-0.74183
Trpt1	9	0.044942	0.926834	920	-0.72994	0.4434	1	8236	-0.72994
C1ql4	8	0.042394	0.926834	921	-1.0487	0.24031	1	4741	-1.0487
Ncoa1	10	0.046928	0.926834	922	-0.13461	0.031815	0.801345	734	-0.13461
Bbc3	10	0.046962	0.926834	923	-1.2762	0.96139	1	18183	-1.2762
Ctrb1	10	0.046964	0.926834	924	-1.1328	0.97731	1	18562	-1.1328
Zfp42	7	0.041208	0.926834	925	-1.2543	0.77479	1	14973	-1.2543
Mief1	9	0.045043	0.926834	926	-0.37844	0.97833	1	18591	-0.37844
Myrf	10	0.047	0.926834	927	-0.41439	0.96379	1	18254	-0.41439
Fcgbp	9	0.04514	0.926834	928	-0.91197	0.94436	1	17847	-0.91197
Xrn1	9	0.045151	0.926834	929	-1.0377	0.71756	1	13255	-1.0377
Ccdc34	10	0.04709	0.926992	930	0.67897	0.53353	1	9699	0.67897
Pttg1ip	9	0.045199	0.926834	931	-0.84367	0.64265	1	11953	-0.84367
3110007F17Rik	10	0.04717	0.927609	932	-0.59222	0.61513	1	11182	-0.59222
Pdxp	9	0.045271	0.926834	933	-0.91688	0.60951	1	11361	-0.91688
E030002O03Rik	9	0.045356	0.926834	934	-0.76575	0.58929	1	11041	-0.76575
Zfp1	9	0.045369	0.926834	935	-0.78485	0.37118	1	6988	-0.78485
Cyp11a1	9	0.045418	0.926834	936	-1.0498	0.63021	1	11734	-1.0498
Trmt6	10	0.047357	0.929371	937	-1.3585	0.75364	1	13758	-1.3585
Drg1	9	0.045513	0.926834	938	-0.88806	0.44894	1	8347	-0.88806
Psmb4	9	0.045551	0.926834	939	1.0563	0.031107	0.795892	759	1.0563
Cenpb	10	0.047455	0.930098	940	-1.2136	0.86291	1	16091	-1.2136
Nsfl1c	9	0.045621	0.926834	941	-1.0585	0.93451	1	17660	-1.0585
C130060K24Rik	9	0.045636	0.926834	942	-1.0476	0.72663	1	13480	-1.0476
Rangap1	10	0.047567	0.930098	943	1.1006	0.013123	0.669866	368	1.1006
Ctla2b	10	0.04759	0.930098	944	-1.1657	0.67949	1	12453	-1.1657
Tcte1	10	0.047681	0.93084	945	-1.1882	0.62137	1	11312	-1.1882
Crisp3	10	0.047725	0.93084	946	-1.112	0.6632	1	12138	-1.112
Tiparp	7	0.042001	0.926834	947	-0.90449	0.60521	1	12027	-0.90449
Ano7	9	0.046015	0.926834	948	0.15947	0.29727	1	5656	0.15947
Def6	9	0.04618	0.926834	949	-0.26534	0.4906	1	9114	-0.26534
Spidr	10	0.04805	0.931444	950	-0.55662	0.82318	1	15206	-0.55662
Wdr45	9	0.046262	0.926834	951	-1.4099	0.93307	1	17631	-1.4099
Wdr54	10	0.048204	0.932539	952	-0.98945	0.20342	1	3743	-0.98945
Gjd3	9	0.046424	0.926834	953	-0.95195	0.95606	1	18094	-0.95195
Mcm7	9	0.046452	0.926834	954	-1.617	0.50684	1	9463	-1.617
Ccdc96	8	0.04368	0.926834	955	-0.59152	0.66524	1	12680	-0.59152
Usp54	9	0.04648	0.926834	956	-1.0406	0.77854	1	14666	-1.0406
Prl7d1	9	0.046604	0.926834	957	0.023297	0.83442	1	15661	0.023297
Mtr	9	0.046619	0.926834	958	-0.9965	0.61824	1	11511	-0.9965
Serpinb10	10	0.048436	0.935126	959	-1.168	0.5648	1	10199	-1.168
Gm11837	10	0.048502	0.935443	960	-0.24201	0.7213	1	13247	-0.24201
Tmem232	9	0.046833	0.926834	961	-0.75271	0.66559	1	12335	-0.75271
Me2	9	0.046873	0.926834	962	-0.85574	0.98146	1	18656	-0.85574
2610020H08Rik	10	0.048666	0.936339	963	-1.3014	0.39937	1	7349	-1.3014
Hexa	9	0.046925	0.926834	964	-0.14789	0.81091	1	15230	-0.14789
Tmem28	6	0.038988	0.926834	965	-1.2594	0.87308	1	17097	-1.2594
NC_32	4	0.033087	0.921244	966	-1.3149	0.82871	1	16790	-1.3149
Rasa1	10	0.04891	0.936339	967	-0.99768	0.089221	0.934066	1779	-0.99768
Gm933	10	0.048929	0.936339	968	-0.83112	0.81354	1	15005	-0.83112
Lmf2	8	0.044353	0.926834	969	-0.28174	0.70847	1	13670	-0.28174
Pramef25	10	0.048958	0.936339	970	-0.45322	0.3985	1	7326	-0.45322
Them4	10	0.049006	0.936339	971	-0.39537	0.734	1	13440	-0.39537
Psmd2	8	0.04448	0.926834	972	-0.022372	0.58183	1	11065	-0.022372
Ehmt2	10	0.049192	0.93655	973	-0.43186	0.46087	1	8500	-0.43186
Batf	10	0.04934	0.93655	974	-0.86776	0.94469	1	17750	-0.86776
Il1rn	10	0.049373	0.93655	975	0.18465	0.52204	1	9515	0.18465
Qsox1	10	0.049394	0.93655	976	-1.0151	0.98337	1	18691	-1.0151
Hltf	10	0.049524	0.937125	977	-0.9798	0.9318	1	17417	-0.9798
Sp140	9	0.047974	0.931444	978	-0.71407	0.96979	1	18397	-0.71407
Gm362	10	0.049694	0.938029	979	0.44671	0.039711	0.824973	889	0.44671
Ppfia3	9	0.047999	0.931444	980	-1.2045	0.054249	0.875307	1188	-1.2045
Ap3b2	9	0.048027	0.931444	981	-0.72456	0.877	1	16440	-0.72456
Sh3bp4	8	0.045084	0.926834	982	0.1295	0.71645	1	13837	0.1295
Prss44	10	0.049788	0.938029	983	-0.78973	0.42202	1	7759	-0.78973
Adora2b	9	0.048128	0.932018	984	-0.71776	0.71636	1	13226	-0.71776
Rab25	10	0.049907	0.938029	985	-0.97985	0.85557	1	15931	-0.97985
Lrrc16a	9	0.048262	0.932698	986	-0.80154	0.99889	1	19006	-0.80154
Tbcel	10	0.050008	0.938029	987	-0.1527	0.89404	1	16614	-0.1527
Ten1	10	0.050184	0.938029	988	-0.831	0.87907	1	16404	-0.831
Frmd7	10	0.050227	0.938029	989	0.32223	0.23879	1	4400	0.32223
Rad54l	9	0.048808	0.936339	990	-0.59894	0.9831	1	18686	-0.59894
Baiap2	10	0.05049	0.938029	991	-1.173	0.64655	1	11821	-1.173
Zfp385c	9	0.048864	0.936339	992	-0.067275	0.81377	1	15282	-0.067275
Pcdha11	10	0.050563	0.938029	993	-1.081	0.91207	1	16929	-1.081
Pdap1	9	0.04896	0.936339	994	-0.8989	0.31654	1	6048	-0.8989
Pcsk5	10	0.050649	0.938029	995	-0.071263	0.87445	1	16322	-0.071263
Ptp4a1	9	0.04904	0.936339	996	-0.91853	0.94033	1	17774	-0.91853
Arsg	8	0.046086	0.926834	997	-0.60489	0.91742	1	17481	-0.60489
Slc17a8	10	0.05078	0.938029	998	-0.38741	0.63001	1	11473	-0.38741
Adora1	10	0.050782	0.938029	999	-0.91612	0.95642	1	18068	-0.91612
Tfip11	10	0.050872	0.938029	1000	0.53712	0.30205	1	5476	0.53712
Pgap1	10	0.050885	0.938029	1001	-0.60136	0.92916	1	17345	-0.60136
Zfp329	9	0.049354	0.93655	1002	-1.0649	0.72167	1	13362	-1.0649
Pkig	9	0.049376	0.93655	1003	-0.80452	0.78172	1	14722	-0.80452
Rpn1	9	0.049405	0.93655	1004	-1.1346	0.93155	1	17591	-1.1346
4930550L24Rik	10	0.05105	0.938029	1005	-1.047	0.97604	1	18541	-1.047
Sorl1	9	0.049445	0.93655	1006	-1.0369	0.87646	1	16425	-1.0369
Ap3d1	10	0.051146	0.938029	1007	-0.98799	0.67011	1	12274	-0.98799
Igfn1	10	0.051246	0.938029	1008	-0.27853	0.86727	1	16179	-0.27853
Dupd1	8	0.046595	0.926834	1009	-0.55679	0.94005	1	17795	-0.55679
Slc5a4a	10	0.051298	0.938029	1010	-0.18472	0.2914	1	5286	-0.18472
Rnpc3	8	0.046615	0.926834	1011	-1.0475	0.35484	1	6753	-1.0475
Ofcc1	10	0.051311	0.938029	1012	-0.99458	0.98716	1	18769	-0.99458
Sf3b2	9	0.049805	0.938029	1013	0.095418	0.57481	1	10812	0.095418
Trp53bp1	10	0.051436	0.938029	1014	-0.76526	0.96352	1	18247	-0.76526
Hes1	10	0.051445	0.938029	1015	-0.9313	0.79034	1	14486	-0.9313
Nr1d2	9	0.049884	0.938029	1016	-0.90524	0.75167	1	14149	-0.90524
Dpf3	8	0.046794	0.926834	1017	-0.84751	0.98349	1	18694	-0.84751
Wfdc11	9	0.049979	0.938029	1018	-0.80782	0.52522	1	9860	-0.80782
Depdc7	9	0.050041	0.938029	1019	-1.1205	0.83671	1	15695	-1.1205
Osr1	9	0.05006	0.938029	1020	-0.52282	0.83983	1	15746	-0.52282
Uap1	9	0.050174	0.938029	1021	-0.44245	0.96405	1	18265	-0.44245
Morn5	8	0.047033	0.926834	1022	-0.82339	0.72221	1	13969	-0.82339
Tlr4	9	0.050264	0.938029	1023	-0.99751	0.75377	1	14209	-0.99751
Gmppb	7	0.046182	0.926834	1024	-1.1542	0.43873	1	8862	-1.1542
Vhl	10	0.05188	0.940269	1025	-0.99346	0.95169	1	17920	-0.99346
2022-03-03	10	0.051913	0.940269	1026	-0.43754	0.54118	1	9820	-0.43754
Col4a3	8	0.047287	0.928961	1027	-0.79629	0.91081	1	17388	-0.79629
Alg1	9	0.050524	0.938029	1028	0.105	0.62495	1	11631	0.105
Bud13	9	0.050627	0.938029	1029	-1.4202	0.60278	1	11259	-1.4202
Aloxe3	9	0.050686	0.938029	1030	-0.99547	0.64234	1	11950	-0.99547
Tmem63b	9	0.050703	0.938029	1031	0.1133	0.10181	0.946703	2052	0.1133
Cdca2	8	0.047569	0.930098	1032	-1.1195	0.85616	1	16534	-1.1195
Spag7	10	0.052424	0.94472	1033	-1.1991	0.69938	1	12831	-1.1991
Izumo3	10	0.052454	0.94472	1034	-0.71996	0.80468	1	14806	-0.71996
Rtdr1	10	0.052457	0.94472	1035	-0.77416	0.021765	0.72858	552	-0.77416
Mup8	4	0.036053	0.926834	1036	-1.0612	0.64791	1	14714	-1.0612
Irx1	9	0.050967	0.938029	1037	-1.3995	0.20784	1	3883	-1.3995
Fchsd2	8	0.04789	0.931444	1038	0.57729	0.18924	1	3707	0.57729
Gpr113	9	0.05113	0.938029	1039	-0.073321	0.49731	1	9257	-0.073321
Cdca3	9	0.051163	0.938029	1040	-0.90978	0.99786	1	18986	-0.90978
Pigh	10	0.052791	0.94483	1041	-0.8487	0.49181	1	9031	-0.8487
8030462N17Rik	9	0.051256	0.938029	1042	-0.18712	0.063361	0.900472	1333	-0.18712
Cacfd1	10	0.052835	0.94483	1043	-0.22769	0.089535	0.934066	1789	-0.22769
Dock7	10	0.052877	0.94483	1044	-0.7885	0.76003	1	13874	-0.7885
Cntf	9	0.051349	0.938029	1045	-0.64388	0.96774	1	18351	-0.64388
Stx18	10	0.053051	0.94483	1046	1.2147	0.0088132	0.61217	269	1.2147
Kdm4d	10	0.053101	0.94483	1047	-0.47232	0.5816	1	10554	-0.47232
Prss3	10	0.053271	0.94483	1048	-0.25427	0.17591	1	3236	-0.25427
Adprh	9	0.051807	0.940269	1049	-0.85723	0.93227	1	17611	-0.85723
Npy6r	9	0.05182	0.940269	1050	-0.09734	0.56244	1	10606	-0.09734
Cd28	9	0.051858	0.940269	1051	-0.66924	0.91824	1	17353	-0.66924
B3galtl	7	0.047938	0.931444	1052	-0.39061	0.25836	1	5135	-0.39061
Nbn	10	0.05373	0.94483	1053	-0.8484	0.45885	1	8459	-0.8484
Aim1l	10	0.053755	0.94483	1054	-0.97499	0.97057	1	18419	-0.97499
Slc25a11	8	0.04904	0.936339	1055	-0.45756	0.40211	1	7742	-0.45756
4933430I17Rik	9	0.052343	0.94472	1056	-0.83214	0.99921	1	19015	-0.83214
Cops6	10	0.053997	0.94483	1057	0.5676	0.13443	0.977579	2529	0.5676
Gm12253	10	0.054002	0.94483	1058	-0.33582	0.97401	1	18488	-0.33582
Msh2	10	0.054002	0.94483	1059	-0.10128	0.22266	1	4117	-0.10128
Il4i1	10	0.054002	0.94483	1060	-0.058874	0.30892	1	5599	-0.058874
Nlk	10	0.054002	0.94483	1061	0.22091	0.0792	0.920355	1607	0.22091
Nup62-il4i1	10	0.054002	0.94483	1062	-0.058874	0.45885	1	8460	-0.058874
Mtmr11	6	0.043668	0.926834	1063	-0.97643	0.99018	1	18825	-0.97643
Aldob	9	0.052555	0.94483	1064	-0.90823	0.64276	1	11956	-0.90823
Hsf2bp	9	0.052593	0.94483	1065	-0.83528	0.71862	1	13290	-0.83528
Serpini1	9	0.052725	0.94483	1066	-0.99237	0.16143	1	3083	-0.99237
Shank1	9	0.052753	0.94483	1067	-1.0142	0.55696	1	10515	-1.0142
4833420G17Rik	9	0.05305	0.94483	1068	-0.41507	0.84163	1	15784	-0.41507
Alg5	9	0.053188	0.94483	1069	-0.84231	0.94319	1	17823	-0.84231
Tbcc	10	0.054743	0.947662	1070	-0.25913	0.3103	1	5627	-0.25913
Crybb1	9	0.053355	0.94483	1071	-1.2245	0.95947	1	18161	-1.2245
Fam19a4	10	0.054882	0.947662	1072	-0.63969	0.85258	1	15866	-0.63969
Ppp4r1	10	0.054995	0.947662	1073	0.16319	0.11386	0.961027	2186	0.16319
Spg7	10	0.055013	0.947662	1074	-0.92623	0.56522	1	10211	-0.92623
Itih5	9	0.053618	0.94483	1075	-0.72026	0.80309	1	15090	-0.72026
Plet1	9	0.053629	0.94483	1076	-0.54431	0.89264	1	16892	-0.54431
Slc35a2	9	0.053638	0.94483	1077	-1.5811	0.85919	1	16111	-1.5811
Sox6	9	0.053662	0.94483	1078	-0.073679	0.37081	1	6982	-0.073679
BC049635	9	0.053708	0.94483	1079	0.19776	0.37481	1	7062	0.19776
Inpp5d	9	0.053926	0.94483	1080	-0.23989	0.59426	1	11123	-0.23989
Prmt8	10	0.055404	0.947767	1081	-0.64918	0.35658	1	6496	-0.64918
0610009D07Rik	9	0.053965	0.94483	1082	0.082427	0.40395	1	7562	0.082427
Bcas1	10	0.055527	0.947767	1083	-0.98547	0.89109	1	16567	-0.98547
Zfp955b	9	0.054081	0.945345	1084	-1.1057	0.99889	1	19005	-1.1057
Dguok	10	0.055551	0.947767	1085	-0.9789	0.66207	1	12125	-0.9789
Ms4a18	10	0.055602	0.947767	1086	0.13369	0.5015	1	9195	0.13369
Kcna10	10	0.055823	0.947767	1087	-0.8612	0.76911	1	14052	-0.8612
Akap8	10	0.055881	0.947767	1088	-0.80533	0.35828	1	6538	-0.80533
3110082I17Rik	9	0.054589	0.947662	1089	-0.14111	0.24738	1	4583	-0.14111
Dusp13	10	0.056015	0.947767	1090	0.030516	0.46475	1	8576	0.030516
Slc6a2	9	0.054651	0.947662	1091	0.026464	0.78322	1	14748	0.026464
Drd5	9	0.054657	0.947662	1092	-0.9159	0.64477	1	11988	-0.9159
Pomp	9	0.054658	0.947662	1093	-0.90324	0.591	1	11074	-0.90324
Mospd1	9	0.054708	0.947662	1094	-0.76644	0.99802	1	18989	-0.76644
Gm9839	10	0.05626	0.947767	1095	-0.53326	0.52918	1	9629	-0.53326
Gm8369	10	0.056262	0.947767	1096	-1.0276	0.94967	1	17868	-1.0276
P4hb	8	0.051304	0.938029	1097	-1.2341	0.67897	1	13042	-1.2341
Il1rap	9	0.054946	0.947662	1098	-0.31685	0.37587	1	7078	-0.31685
Dnajc9	8	0.051364	0.938029	1099	-1.2992	0.57925	1	11024	-1.2992
Mcoln2	10	0.056452	0.947767	1100	-0.37653	0.59929	1	10899	-0.37653
Ppapdc1b	10	0.056452	0.947767	1101	-0.70019	0.46175	1	8524	-0.70019
Rorb	10	0.056627	0.947767	1102	-0.84448	0.97062	1	18421	-0.84448
2022-03-07	9	0.055249	0.947767	1103	-1.1264	0.87412	1	16350	-1.1264
Lrrc52	8	0.051644	0.940269	1104	-1.1305	0.95171	1	17999	-1.1305
Psmd8	10	0.056672	0.947767	1105	-0.23199	0.49212	1	9038	-0.23199
Rbm41	10	0.056833	0.947767	1106	-1.0243	0.90256	1	16728	-1.0243
Palld	9	0.055462	0.947767	1107	-0.74584	0.53597	1	10080	-0.74584
Cngb1	9	0.055534	0.947767	1108	-0.11173	0.49866	1	9289	-0.11173
Apoc4	9	0.055642	0.947767	1109	-0.94734	0.871	1	16297	-0.94734
Loh12cr1	10	0.057096	0.947767	1110	-0.96314	0.99341	1	18904	-0.96314
Rnf128	9	0.055703	0.947767	1111	-0.80742	0.62591	1	11650	-0.80742
Hspb8	8	0.052107	0.942876	1112	0.86102	0.039803	0.824973	945	0.86102
Usp16	10	0.057154	0.947767	1113	-0.25029	0.24715	1	4535	-0.25029
Pygo1	10	0.057154	0.947767	1114	0.48197	0.48343	1	8889	0.48197
Lsm2	7	0.051771	0.940269	1115	-1.0188	0.31057	1	6336	-1.0188
Tapbp	8	0.052428	0.94472	1116	-1.3502	0.98837	1	18797	-1.3502
Gimap6	10	0.057527	0.947767	1117	-0.93206	0.91287	1	16948	-0.93206
Hmgcll1	9	0.056383	0.947767	1118	-0.94947	0.9992	1	19014	-0.94947
Cxcl15	10	0.057772	0.947767	1119	0.41554	0.11158	0.958741	2148	0.41554
Neurog1	10	0.057772	0.947767	1120	0.3159	0.10575	0.950488	2051	0.3159
Decr1	10	0.05781	0.947767	1121	-0.51497	0.74331	1	13592	-0.51497
Rad21	9	0.056434	0.947767	1122	-0.80909	0.77834	1	14660	-0.80909
9530068E07Rik	10	0.057894	0.947767	1123	-0.99904	0.75394	1	13769	-0.99904
Crtap	10	0.058055	0.947767	1124	-1.1773	0.40413	1	7441	-1.1773
Xkrx	9	0.056718	0.947767	1125	-1.4025	0.5626	1	10609	-1.4025
AI118078	10	0.058144	0.947767	1126	-0.9145	0.94713	1	17809	-0.9145
Gm13084	10	0.058161	0.947767	1127	0.14617	0.84789	1	15747	0.14617
Abcb10	9	0.056808	0.947767	1128	0.1329	0.27365	1	5142	0.1329
Ace3	10	0.058416	0.947767	1129	-0.93056	0.81203	1	14963	-0.93056
Mybpc1	8	0.053248	0.94483	1130	-1.2166	0.0058381	0.539484	208	-1.2166
Fign	9	0.057162	0.947767	1131	0.21485	0.60426	1	11291	0.21485
Tmem72	8	0.05334	0.94483	1132	-0.9128	0.89553	1	17191	-0.9128
4933402J07Rik	10	0.058525	0.947767	1133	0.93001	0.060755	0.894272	1267	0.93001
Chrm3	10	0.058525	0.947767	1134	0.013371	0.52096	1	9487	0.013371
Themis3	10	0.058525	0.947767	1135	-0.1254	0.63349	1	11541	-0.1254
Vps8	10	0.058539	0.947767	1136	-0.65566	0.075522	0.911629	1543	-0.65566
Msh4	10	0.058711	0.947767	1137	-0.44491	0.75345	1	13754	-0.44491
Gm1965	10	0.058737	0.947767	1138	-0.96262	0.66932	1	12257	-0.96262
Prr3	9	0.057452	0.947767	1139	-0.16108	0.42904	1	8000	-0.16108
Aldh3a2	9	0.057498	0.947767	1140	0.036863	0.38598	1	7258	0.036863
Sqrdl	8	0.053653	0.94483	1141	-0.6985	0.37509	1	7126	-0.6985
Epc1	9	0.057625	0.947767	1142	0.18683	0.5458	1	10306	0.18683
Cxcr5	9	0.057632	0.947767	1143	-1.2328	0.98979	1	18816	-1.2328
Epb4.1l3	10	0.059062	0.947767	1144	-0.26155	0.85361	1	15891	-0.26155
Oc90	9	0.057884	0.947767	1145	-0.69908	0.71156	1	13111	-0.69908
Pts	10	0.059239	0.947767	1146	-0.81388	0.40899	1	7521	-0.81388
Krtcap2	10	0.05926	0.947767	1147	-0.84978	0.38121	1	6978	-0.84978
Lhx1	10	0.059264	0.947767	1148	0.58312	0.060243	0.89285	1258	0.58312
Rpe	9	0.057997	0.947767	1149	-1.064	0.94502	1	17857	-1.064
Eml1	9	0.058032	0.947767	1150	-0.49812	0.86714	1	16229	-0.49812
Adrb2	9	0.058034	0.947767	1151	-0.37415	0.12318	0.963657	2477	-0.37415
2310067B10Rik	10	0.059357	0.947767	1152	-1.0717	0.69113	1	12668	-1.0717
Bend5	8	0.054181	0.946221	1153	0.018172	0.1551	1	3002	0.018172
Wwp2	10	0.059429	0.947767	1154	-0.75875	0.65432	1	11975	-0.75875
Spats2l	10	0.059507	0.947767	1155	0.18207	0.59008	1	10718	0.18207
Abtb2	10	0.059533	0.947767	1156	-0.2143	0.70206	1	12885	-0.2143
Rfx3	9	0.058311	0.947767	1157	-0.98916	0.96851	1	18366	-0.98916
Amelx	10	0.05965	0.947767	1158	-0.95312	0.81409	1	15021	-0.95312
Dnaja2	10	0.05969	0.947767	1159	0.8632	0.11851	0.961027	2279	0.8632
Tas2r114	10	0.059752	0.947767	1160	-0.82105	0.24496	1	4499	-0.82105
Lrpap1	10	0.059808	0.947767	1161	-0.28477	0.94798	1	17826	-0.28477
Zbtb49	8	0.054588	0.947662	1162	-0.77015	0.90619	1	17322	-0.77015
Mrps10	10	0.05991	0.947767	1163	-0.72673	0.94518	1	17764	-0.72673
Eif3f	9	0.058642	0.947767	1164	0.81755	0.078158	0.920355	1592	0.81755
Scx	10	0.060006	0.947767	1165	-0.094358	0.82684	1	15292	-0.094358
Fcrlb	10	0.060049	0.947767	1166	-0.70222	0.6546	1	11979	-0.70222
Trappc2	8	0.054798	0.947662	1167	-0.75988	0.40756	1	7864	-0.75988
Efs	10	0.060105	0.947767	1168	-0.51339	0.42741	1	7858	-0.51339
Cntn3	8	0.054939	0.947662	1169	-1.4245	0.23449	1	4633	-1.4245
Tex33	9	0.058926	0.947767	1170	-0.59215	0.98277	1	18679	-0.59215
Zfp457	8	0.054968	0.947662	1171	-0.67561	0.5503	1	10617	-0.67561
Tlr2	8	0.055159	0.947767	1172	-1.0831	0.78695	1	15006	-1.0831
Rpl26	8	0.055194	0.947767	1173	1.2658	0.012404	0.667016	375	1.2658
Grpr	10	0.060568	0.947767	1174	-1.0397	0.45293	1	8368	-1.0397
Apoh	10	0.060617	0.947767	1175	-1.0746	0.89714	1	16657	-1.0746
Dmrtc1a	9	0.059361	0.947767	1176	-0.66279	0.95631	1	18097	-0.66279
Gsdmc2	9	0.059507	0.947767	1177	-0.30303	0.38852	1	7308	-0.30303
Mmadhc	10	0.060827	0.947767	1178	0.31972	0.036659	0.815434	828	0.31972
Gm14744	10	0.060856	0.947767	1179	-0.8898	0.82509	1	15248	-0.8898
Spock2	9	0.059646	0.947767	1180	-0.8355	0.51655	1	9684	-0.8355
Gm16367	10	0.060914	0.947767	1181	-0.43998	0.66224	1	12127	-0.43998
Gm3139	10	0.060914	0.947767	1182	-0.43998	0.81638	1	15068	-0.43998
AU018829	10	0.060914	0.947767	1183	-0.43998	0.66224	1	12126	-0.43998
Ptchd2	9	0.059664	0.947767	1184	-0.78949	0.8837	1	16650	-0.78949
Sumf1	9	0.059666	0.947767	1185	-0.94745	0.94896	1	17931	-0.94745
Dspp	10	0.060931	0.947767	1186	-0.66028	0.40063	1	7372	-0.66028
Sctr	10	0.061008	0.947767	1187	-0.10368	0.32575	1	5904	-0.10368
Cyp2d26	9	0.059775	0.947767	1188	-1.1951	0.88539	1	16693	-1.1951
Morc2b	9	0.059783	0.947767	1189	-0.51851	0.99881	1	19003	-0.51851
Adra2c	10	0.061069	0.947767	1190	-0.9142	0.63315	1	11527	-0.9142
Col18a1	7	0.05506	0.947662	1191	-0.10281	0.45729	1	9187	-0.10281
4933402P03Rik	9	0.059851	0.947767	1192	-0.83745	0.9368	1	17707	-0.83745
NC_42	4	0.042986	0.926834	1193	-1.3389	0.75017	1	15994	-1.3389
Stfa1	9	0.059892	0.947767	1194	-0.28874	0.73763	1	13751	-0.28874
Gm757	10	0.06114	0.947767	1195	-0.77347	0.88815	1	16530	-0.77347
Ppara	9	0.06005	0.947767	1196	-0.3667	0.74046	1	13833	-0.3667
1700042G07Rik	9	0.060071	0.947767	1197	-1.2058	0.77357	1	14570	-1.2058
Fbxo27	10	0.06138	0.947767	1198	-1.0049	0.37808	1	6913	-1.0049
Tmem229a	9	0.060157	0.947767	1199	-0.81335	0.85191	1	15971	-0.81335
Spdyb	10	0.061386	0.947767	1200	-0.9423	0.15276	1	2835	-0.9423
Gm13157	10	0.061393	0.947767	1201	-0.86467	0.42389	1	7788	-0.86467
Defa20	8	0.05612	0.947767	1202	-0.27798	0.82215	1	15526	-0.27798
Gm15308	8	0.05612	0.947767	1203	-0.23469	0.82215	1	15525	-0.23469
Best3	9	0.060291	0.947767	1204	-0.97973	0.9768	1	18557	-0.97973
Atxn7	9	0.060297	0.947767	1205	-0.87795	0.52587	1	9871	-0.87795
Mff	9	0.060318	0.947767	1206	0.19676	0.26587	1	4985	0.19676
Chd3	8	0.05628	0.947767	1207	-0.64142	0.40144	1	7726	-0.64142
Itga4	10	0.061718	0.947767	1208	-0.64448	0.17521	1	3221	-0.64448
Bglap3	9	0.060497	0.947767	1209	-0.12788	0.29414	1	5579	-0.12788
Ttll8	10	0.061752	0.947767	1210	-0.885	0.8779	1	16380	-0.885
Slc20a1	10	0.06182	0.947767	1211	-0.32045	0.565	1	10202	-0.32045
Eid3	9	0.060748	0.947767	1212	-0.51038	0.656	1	12169	-0.51038
Neu2	10	0.062037	0.947767	1213	-0.94775	0.46333	1	8552	-0.94775
Ttc8	10	0.062158	0.947767	1214	-0.83863	0.90484	1	16761	-0.83863
Tnfrsf23	10	0.062204	0.947767	1215	-0.28344	0.97754	1	18572	-0.28344
Dmrta2	10	0.062254	0.947767	1216	-0.86724	0.75611	1	13808	-0.86724
Hnrnpa3	10	0.062256	0.947767	1217	-0.032378	0.75066	1	13709	-0.032378
Thnsl1	10	0.062272	0.947767	1218	-1.0315	0.64242	1	11731	-1.0315
Fdps	9	0.061157	0.947767	1219	-1.2604	0.42329	1	7894	-1.2604
Tmem192	9	0.06119	0.947767	1220	-1.0981	0.59252	1	11099	-1.0981
Smg9	9	0.061254	0.947767	1221	-0.71844	0.85523	1	16037	-0.71844
Tspan2	9	0.061254	0.947767	1222	-0.52286	0.93293	1	17626	-0.52286
Gm8765	10	0.062459	0.947767	1223	-0.43132	0.54588	1	9903	-0.43132
Idua	8	0.057133	0.947767	1224	0.62565	0.2748	1	5393	0.62565
Foxp3	9	0.061475	0.947767	1225	-0.34316	0.41212	1	7698	-0.34316
Nrtn	9	0.061526	0.947767	1226	-1.1567	0.89501	1	16942	-1.1567
Oser1	10	0.062767	0.947767	1227	-0.97389	0.30553	1	5535	-0.97389
Trpc7	9	0.061625	0.947767	1228	0.2424	0.35879	1	6756	0.2424
Ahcyl2	8	0.057459	0.947767	1229	-0.30999	0.96743	1	18345	-0.30999
Zkscan4	8	0.057547	0.947767	1230	-1.1839	0.71197	1	13731	-1.1839
Ldlrad3	9	0.061858	0.947767	1231	-0.40637	0.99145	1	18857	-0.40637
Sgpl1	10	0.06303	0.947767	1232	-0.09932	0.95696	1	18081	-0.09932
Spns1	10	0.06303	0.947767	1233	0.018074	0.70041	1	12849	0.018074
Nanp	10	0.06303	0.947767	1234	-0.22669	0.66192	1	12119	-0.22669
Tmem106c	9	0.06188	0.947767	1235	-0.27648	0.75032	1	14111	-0.27648
Nadsyn1	9	0.061914	0.947767	1236	-0.64309	0.88542	1	16695	-0.64309
Pros1	8	0.05768	0.947767	1237	-0.75676	0.82163	1	15514	-0.75676
Dusp23	9	0.062069	0.947767	1238	-0.26172	0.8904	1	16850	-0.26172
Slitrk6	10	0.063302	0.947767	1239	-0.83605	0.63844	1	11642	-0.83605
Plekha4	8	0.057859	0.947767	1240	-0.80176	0.3361	1	6475	-0.80176
Pygm	10	0.063349	0.947767	1241	-0.89907	0.81389	1	15017	-0.89907
Sfmbt1	10	0.063387	0.947767	1242	-1.018	0.42612	1	7835	-1.018
Slc19a1	9	0.062311	0.947767	1243	-0.64636	0.60376	1	11283	-0.64636
Ffar1	10	0.063677	0.947767	1244	0.12086	0.17474	1	3213	0.12086
H1foo	9	0.062584	0.947767	1245	-0.90463	0.5819	1	10924	-0.90463
Psma5	10	0.063729	0.947767	1246	-0.3707	0.71963	1	13220	-0.3707
Hist1h2ba	9	0.062669	0.947767	1247	-0.085215	0.64273	1	11954	-0.085215
Skiv2l2	9	0.062669	0.947767	1248	-1.0335	0.83056	1	15598	-1.0335
Mcl1	9	0.06274	0.947767	1249	-0.52524	0.36361	1	6843	-0.52524
Tgfbr1	10	0.063831	0.947767	1250	-0.88513	0.53335	1	9698	-0.88513
4933405L10Rik	10	0.063849	0.947767	1251	0.94338	0.055595	0.881422	1181	0.94338
Cldn3	9	0.062775	0.947767	1252	-0.70498	0.86144	1	16146	-0.70498
Esyt3	10	0.063859	0.947767	1253	-1.2418	0.87276	1	16277	-1.2418
Spata18	10	0.063875	0.947767	1254	-0.81517	0.59229	1	10762	-0.81517
Sirt2	9	0.063057	0.947767	1255	-0.89891	0.60881	1	11352	-0.89891
NC_50	3	0.036693	0.926834	1256	-1.9406	0.017613	0.714758	725	-1.9406
Slc25a14	10	0.06426	0.947767	1257	-0.5878	0.93109	1	17395	-0.5878
Alg9	10	0.064271	0.947767	1258	-0.4894	0.64287	1	11740	-0.4894
Iigp1	10	0.064301	0.947767	1259	-0.74582	0.25836	1	4726	-0.74582
Tle1	9	0.063236	0.947767	1260	-0.68045	0.9991	1	19010	-0.68045
Hagh	9	0.063236	0.947767	1261	-0.5651	0.5578	1	10530	-0.5651
Zmym4	8	0.05884	0.947767	1262	-1.0544	0.96644	1	18325	-1.0544
Atad5	9	0.063257	0.947767	1263	-0.68366	0.98663	1	18760	-0.68366
E330021D16Rik	10	0.064365	0.947767	1264	-0.68652	0.94584	1	17780	-0.68652
Tpsg1	10	0.06437	0.947767	1265	-0.38455	0.17884	1	3291	-0.38455
Zfp882	9	0.063351	0.947767	1266	-1.0323	0.91948	1	17378	-1.0323
Klra17	9	0.063441	0.947767	1267	-0.71414	0.97231	1	18457	-0.71414
Klhdc4	9	0.063521	0.947767	1268	-0.6721	0.88009	1	16538	-0.6721
Icos	10	0.064667	0.947767	1269	-0.63382	0.42843	1	7881	-0.63382
Rcvrn	10	0.064667	0.947767	1270	-0.54825	0.85623	1	15945	-0.54825
Fbxo48	8	0.059203	0.947767	1271	-0.50512	0.98484	1	18727	-0.50512
Creb3	9	0.063685	0.947767	1272	0.059518	0.45314	1	8408	0.059518
Hnrnpul1	10	0.064771	0.947767	1273	-1.0354	0.92815	1	17320	-1.0354
Slc2a9	9	0.063747	0.947767	1274	-0.55311	0.80768	1	15173	-0.55311
Cul5	10	0.064815	0.947767	1275	-0.37446	0.95583	1	18049	-0.37446
Setd5	10	0.064823	0.947767	1276	-0.61381	0.99883	1	19004	-0.61381
Htr1a	10	0.064873	0.947767	1277	0.027847	0.20748	1	3837	0.027847
Emid1	9	0.063923	0.947767	1278	-0.33676	0.59874	1	11184	-0.33676
Slc25a35	9	0.063943	0.947767	1279	-0.84195	0.83717	1	15704	-0.84195
Gucy1a3	10	0.065014	0.947767	1280	-1.1296	0.9292	1	17346	-1.1296
Gsg2	10	0.065077	0.947767	1281	-0.5331	0.59787	1	10868	-0.5331
Slc5a10	10	0.065154	0.947767	1282	-0.40919	0.58253	1	10573	-0.40919
Mfn1	9	0.064173	0.947767	1283	-1.0169	0.99554	1	18947	-1.0169
1700001J03Rik	10	0.06521	0.947767	1284	-0.45256	0.72158	1	13253	-0.45256
9930111J21Rik2	10	0.065228	0.947767	1285	-0.84816	0.73688	1	13491	-0.84816
Galnt18	10	0.065286	0.947767	1286	-0.92988	0.23665	1	4355	-0.92988
Cyp2c50	10	0.065316	0.947767	1287	-0.8592	0.75312	1	13744	-0.8592
D630045J12Rik	10	0.065333	0.947767	1288	-0.96627	0.2274	1	4200	-0.96627
Bok	9	0.06443	0.947767	1289	0.44865	0.31946	1	6097	0.44865
Tas2r126	9	0.064513	0.947767	1290	-0.82037	0.78686	1	14805	-0.82037
Esp6	8	0.060101	0.947767	1291	-1.1262	0.59847	1	11310	-1.1262
Ppp1r9b	10	0.065677	0.947767	1292	-0.077526	0.25292	1	4638	-0.077526
1700013H16Rik	9	0.064851	0.947767	1293	-0.65344	0.46891	1	8684	-0.65344
Zfp595	8	0.060259	0.947767	1294	-0.54583	0.94968	1	17948	-0.54583
Mospd2	10	0.065869	0.947767	1295	-0.33958	0.15093	1	2798	-0.33958
Man2a2	9	0.065055	0.947767	1296	-0.67386	0.50148	1	9354	-0.67386
Mmp23	10	0.066063	0.947767	1297	-0.75349	0.45028	1	8312	-0.75349
Etnppl	10	0.066207	0.947767	1298	-0.78856	0.85232	1	15854	-0.78856
Mrgprf	10	0.066253	0.947767	1299	-1.0072	0.66277	1	12131	-1.0072
Tdrd6	9	0.065366	0.947767	1300	-0.64198	0.67481	1	12485	-0.64198
2410124H12Rik	10	0.066276	0.947767	1301	-0.07625	0.46857	1	8642	-0.07625
Dmxl2	9	0.065406	0.947767	1302	-0.70442	0.9897	1	18815	-0.70442
Rhbdd3	9	0.065424	0.947767	1303	-0.85937	0.78324	1	14749	-0.85937
Bcam	9	0.065434	0.947767	1304	-1.2583	0.67163	1	12430	-1.2583
Ar	8	0.060733	0.947767	1305	-0.70628	0.82801	1	15617	-0.70628
Ccl20	10	0.066331	0.947767	1306	-0.50745	0.54906	1	9941	-0.50745
Paf1	9	0.065521	0.947767	1307	-0.8623	0.09687	0.942753	1965	-0.8623
Abcd4	9	0.06556	0.947767	1308	-1.1966	0.25249	1	4696	-1.1966
D3Bwg0562e	10	0.066493	0.947767	1309	-0.62541	0.49877	1	9142	-0.62541
Slc22a19	10	0.06651	0.947767	1310	-0.54389	0.42296	1	7771	-0.54389
Pdlim4	9	0.065676	0.947767	1311	-0.72597	0.50658	1	9458	-0.72597
Zfp109	9	0.065893	0.947767	1312	-0.36549	0.66532	1	12332	-0.36549
Bbs7	10	0.066762	0.947767	1313	0.088301	0.81182	1	14960	0.088301
1190003K10Rik	9	0.06592	0.947767	1314	-0.62356	0.97456	1	18498	-0.62356
Prkcq	9	0.06592	0.947767	1315	-0.43796	0.24804	1	4600	-0.43796
Ylpm1	8	0.061167	0.947767	1316	-1.0108	0.83209	1	15721	-1.0108
Stat1	10	0.066878	0.947767	1317	-0.051407	0.82094	1	15156	-0.051407
Fam110a	10	0.067076	0.947767	1318	-0.24655	0.82596	1	15267	-0.24655
Bglap	10	0.067103	0.947767	1319	0.21048	0.33459	1	6084	0.21048
Pld4	9	0.066301	0.947767	1320	-0.76877	0.30169	1	5751	-0.76877
Smim8	10	0.06713	0.947767	1321	-0.15111	0.19754	1	3635	-0.15111
Pip4k2a	10	0.067232	0.947767	1322	-0.96125	0.64207	1	11720	-0.96125
Ptch1	10	0.067291	0.947767	1323	0.17978	0.69113	1	12666	0.17978
Adam1b	10	0.067341	0.947767	1324	-0.65138	0.62221	1	11325	-0.65138
Cldn18	9	0.066572	0.947767	1325	-0.63953	0.99832	1	18994	-0.63953
Kcnk18	10	0.067377	0.947767	1326	-0.61989	0.99382	1	18910	-0.61989
Prss53	10	0.067403	0.947767	1327	-0.96384	0.11091	0.958741	2140	-0.96384
Gins4	10	0.067501	0.947767	1328	-0.95991	0.14345	0.993677	2678	-0.95991
Cyp2j6	10	0.06754	0.947767	1329	0.47858	0.36751	1	6692	0.47858
Decr2	10	0.067593	0.947767	1330	-0.7409	0.96209	1	18199	-0.7409
Chl1	9	0.066829	0.947767	1331	-0.34145	0.72808	1	13512	-0.34145
2310061N02Rik	10	0.067621	0.947767	1332	-0.71013	0.82376	1	15220	-0.71013
Cebpd	8	0.061928	0.947767	1333	-0.34886	0.44853	1	8783	-0.34886
Zfp418	9	0.066857	0.947767	1334	-0.62004	0.72788	1	13509	-0.62004
Pla2g3	10	0.067685	0.947767	1335	-1.1556	0.74874	1	13687	-1.1556
Col9a2	9	0.066907	0.947767	1336	-0.87167	0.47791	1	8835	-0.87167
Gas8	9	0.066908	0.947767	1337	-1.1065	0.51597	1	9670	-1.1065
Nol9	10	0.067719	0.947767	1338	1.376	0.0043084	0.481629	166	1.376
Usp42	9	0.067038	0.947767	1339	-1.2851	0.32037	1	6116	-1.2851
Serf2	10	0.06783	0.947767	1340	-0.64502	0.64711	1	11830	-0.64502
Glrb	10	0.067915	0.947767	1341	-0.62578	0.053854	0.875307	1141	-0.62578
Tmem35	10	0.067953	0.947767	1342	-0.34392	0.34973	1	6367	-0.34392
Pik3c2b	10	0.067963	0.947767	1343	-0.48899	0.84176	1	15636	-0.48899
Pnpla6	9	0.067267	0.947767	1344	-0.54161	0.97643	1	18548	-0.54161
Fzd8	9	0.06739	0.947767	1345	-0.47312	0.32067	1	6123	-0.47312
Zfp644	8	0.062454	0.947767	1346	-1.1486	0.7869	1	15002	-1.1486
Scd2	10	0.068225	0.947767	1347	-0.92108	0.72457	1	13308	-0.92108
Padi2	9	0.067546	0.947767	1348	-0.98946	0.90196	1	17072	-0.98946
Gm5595	9	0.067692	0.947767	1349	-1.1585	0.82716	1	15536	-1.1585
Dgki	9	0.067741	0.947767	1350	-0.99602	0.91109	1	17227	-0.99602
Ikzf3	10	0.068467	0.947767	1351	-0.82006	0.81584	1	15056	-0.82006
Ccdc159	10	0.068495	0.947767	1352	-1.0797	0.46661	1	8609	-1.0797
Crhr2	10	0.068508	0.947767	1353	-0.63179	0.48559	1	8925	-0.63179
Apoa5	10	0.068508	0.947767	1354	-0.37658	0.90779	1	16824	-0.37658
Las1l	10	0.068508	0.947767	1355	-0.49122	0.2274	1	4202	-0.49122
D5Ertd579e	9	0.067839	0.947767	1356	0.19947	0.068673	0.907649	1412	0.19947
Apol6	10	0.068568	0.947767	1357	-0.35794	0.4575	1	8431	-0.35794
Jade2	10	0.068616	0.947767	1358	-1.2524	0.83588	1	15489	-1.2524
Gpr15	8	0.062862	0.947767	1359	-0.60782	0.89249	1	17154	-0.60782
Mgat3	8	0.06289	0.947767	1360	-0.93161	0.69078	1	13317	-0.93161
AK129341	10	0.068662	0.947767	1361	-0.8622	0.75095	1	13716	-0.8622
Ermn	10	0.068745	0.947767	1362	-1.0323	0.89352	1	16608	-1.0323
4930415F15Rik	9	0.068112	0.947767	1363	-0.81705	0.99678	1	18967	-0.81705
Epha2	9	0.068338	0.947767	1364	-1.1781	0.34509	1	6541	-1.1781
Chst12	10	0.06903	0.949461	1365	-1.0027	0.41462	1	7617	-1.0027
Zdhhc13	9	0.068372	0.947767	1366	-1.0448	0.71549	1	13197	-1.0448
Ccdc24	9	0.068498	0.947767	1367	-1.0747	0.79051	1	14872	-1.0747
Slc26a10	9	0.068548	0.947767	1368	-0.56422	0.76028	1	14331	-0.56422
Glra3	10	0.069351	0.950759	1369	-0.44533	0.86957	1	16217	-0.44533
Usp47	10	0.069373	0.950759	1370	-0.9079	0.80617	1	14840	-0.9079
Mospd3	10	0.069608	0.950759	1371	-0.78277	0.67355	1	12340	-0.78277
Dmrt2	10	0.069656	0.950759	1372	-0.42592	0.67011	1	12272	-0.42592
Lysmd1	10	0.069818	0.950759	1373	-0.81349	0.61439	1	11171	-0.81349
Nhsl1	10	0.06993	0.950759	1374	-1.0642	0.83485	1	15470	-1.0642
Pomk	10	0.069962	0.950759	1375	-1.1395	0.99496	1	18933	-1.1395
Bcmo1	10	0.069973	0.950759	1376	-0.076519	0.62271	1	11334	-0.076519
Ugdh	9	0.069387	0.950759	1377	-1.106	0.96426	1	18269	-1.106
Lmod1	10	0.07001	0.950759	1378	-0.81798	0.73281	1	13426	-0.81798
Tmem30a	9	0.069482	0.950759	1379	0.075533	0.28836	1	5459	0.075533
Trim39	9	0.069482	0.950759	1380	-0.59454	0.15958	1	3053	-0.59454
Tmem120b	10	0.07009	0.950759	1381	-0.75868	0.73909	1	13526	-0.75868
Cdc45	10	0.070161	0.950759	1382	-0.86366	0.91979	1	17125	-0.86366
Rpl36a	6	0.058064	0.947767	1383	-0.37796	0.555	1	11494	-0.37796
1700037H04Rik	9	0.069633	0.950759	1384	-0.80212	0.75379	1	14210	-0.80212
Mst1r	10	0.07022	0.950759	1385	-0.82295	0.76254	1	13923	-0.82295
6030458C11Rik	10	0.070323	0.950759	1386	-0.93701	0.090875	0.941086	1813	-0.93701
Nbl1	10	0.070379	0.950836	1387	-0.74962	0.74029	1	13546	-0.74962
Rhd	9	0.069893	0.950759	1388	-0.69292	0.11623	0.961027	2343	-0.69292
Slc5a9	8	0.0646	0.947767	1389	-0.68891	0.4939	1	9626	-0.68891
Tcstv1	9	0.069958	0.950759	1390	-1.084	0.79888	1	15023	-1.084
Nnt	10	0.070576	0.951841	1391	-0.19132	0.2725	1	4965	-0.19132
Tex13a	10	0.070677	0.951841	1392	-0.62509	0.75374	1	13760	-0.62509
Sox13	9	0.070273	0.950759	1393	-0.85974	0.56049	1	10570	-0.85974
Zfp735	9	0.070282	0.950759	1394	-0.65119	0.67215	1	12442	-0.65119
Klk4	9	0.070296	0.950759	1395	-0.53002	0.97842	1	18593	-0.53002
Kif3b	8	0.064953	0.947767	1396	-0.33953	0.71	1	13699	-0.33953
2310039H08Rik	10	0.070961	0.951841	1397	0.20819	0.252	1	4618	0.20819
Fam131c	10	0.071058	0.951841	1398	-0.62992	0.71116	1	13063	-0.62992
Ssfa2	10	0.071058	0.951841	1399	-0.79583	0.94355	1	17718	-0.79583
Eps15l1	9	0.070565	0.951841	1400	-0.78991	0.58453	1	10961	-0.78991
Sp8	9	0.07067	0.951841	1401	-1.0507	0.52587	1	9872	-1.0507
Rad17	9	0.070754	0.951841	1402	-0.78479	0.79905	1	15028	-0.78479
Psma2	10	0.071336	0.951841	1403	-0.31043	0.18899	1	3470	-0.31043
Skint11	10	0.071574	0.951841	1404	-0.05309	0.21479	1	3972	-0.05309
Ptcra	10	0.0716	0.951841	1405	-0.82746	0.44002	1	8118	-0.82746
Srsf6	10	0.071601	0.951841	1406	-0.11075	0.96298	1	18224	-0.11075
Zfp334	8	0.0658	0.947767	1407	-0.72293	0.94687	1	17899	-0.72293
Gsg1l	9	0.071226	0.951841	1408	-0.65288	0.9711	1	18435	-0.65288
Hepacam2	10	0.071761	0.951841	1409	-0.98995	0.83537	1	15481	-0.98995
Avpr2	9	0.071298	0.951841	1410	-0.5872	0.8133	1	15269	-0.5872
Oasl2	9	0.071356	0.951841	1411	-0.90588	0.81504	1	15308	-0.90588
Plekhn1	10	0.071938	0.951841	1412	-0.45445	0.02809	0.774247	676	-0.45445
Nasp	8	0.066034	0.947767	1413	-0.48586	0.88697	1	17077	-0.48586
Ccnc	10	0.071999	0.951841	1414	-0.93859	0.17531	1	3226	-0.93859
Wipi2	10	0.072054	0.951841	1415	-0.69939	0.67257	1	12325	-0.69939
Dcc	9	0.071624	0.951841	1416	-0.60083	0.64192	1	11935	-0.60083
Rtp1	10	0.072176	0.951841	1417	-0.59596	0.98424	1	18716	-0.59596
Senp5	10	0.072233	0.951841	1418	-1.0523	0.65902	1	12072	-1.0523
Ap1m2	8	0.06643	0.947767	1419	-0.41982	0.10772	0.955114	2240	-0.41982
Foxd2	10	0.072382	0.951841	1420	-0.95106	0.79757	1	14645	-0.95106
Arrdc3	9	0.071993	0.951841	1421	-0.40188	0.87659	1	16429	-0.40188
Nek4	9	0.072041	0.951841	1422	-1.037	0.69575	1	12834	-1.037
4930480E11Rik	10	0.072704	0.951841	1423	-0.68789	0.99647	1	18962	-0.68789
Nfatc4	9	0.072227	0.951841	1424	-0.32997	0.69839	1	12876	-0.32997
Gm438	9	0.072275	0.951841	1425	-0.89329	0.99755	1	18981	-0.89329
Ankrd33	8	0.066949	0.947767	1426	-0.83255	0.93423	1	17710	-0.83255
Rad51c	10	0.072972	0.951841	1427	-0.39809	0.60222	1	10946	-0.39809
Nags	10	0.073007	0.951841	1428	-0.85229	0.38831	1	7123	-0.85229
Gtf3c1	10	0.07302	0.951841	1429	-0.1382	0.65307	1	11951	-0.1382
Gramd4	9	0.07246	0.951841	1430	-1.0093	0.38179	1	7193	-1.0093
Caly	10	0.073101	0.951841	1431	-0.96886	0.99515	1	18941	-0.96886
Cyb561	10	0.073156	0.951841	1432	-0.34337	0.51466	1	9395	-0.34337
Ankrd22	10	0.073191	0.951841	1433	-0.80903	0.27797	1	5069	-0.80903
1700034F02Rik	9	0.072621	0.951841	1434	-1.2798	0.56049	1	10571	-1.2798
Tor4a	9	0.072705	0.951841	1435	-1.0472	0.48231	1	8927	-1.0472
Mutyh	10	0.073336	0.951841	1436	-1.0409	0.64042	1	11682	-1.0409
Tmx2	8	0.067386	0.947767	1437	0.066555	0.0015138	0.306562	98	0.066555
Padi6	9	0.072728	0.951841	1438	-1.0703	0.49323	1	9178	-1.0703
Prelp	9	0.072911	0.951841	1439	-0.48455	0.28418	1	5362	-0.48455
Gnl3l	10	0.073634	0.951841	1440	0.57587	0.044158	0.841332	974	0.57587
Trim71	10	0.073634	0.951841	1441	-0.25082	0.51102	1	9339	-0.25082
Ppp1r13b	10	0.073634	0.951841	1442	-0.92327	0.65605	1	12014	-0.92327
Dydc1	8	0.067694	0.947767	1443	-1.5026	0.82583	1	15586	-1.5026
Madcam1	10	0.073689	0.951841	1444	0.22626	0.16819	1	3100	0.22626
Pwp1	9	0.073079	0.951841	1445	0.052234	0.47688	1	8807	0.052234
Ceacam20	10	0.073982	0.951841	1446	-0.19508	0.46593	1	8595	-0.19508
Itprip	10	0.074013	0.951841	1447	-0.8522	0.94225	1	17695	-0.8522
Usp53	9	0.073322	0.951841	1448	-0.077671	0.85983	1	16123	-0.077671
Lin9	10	0.07404	0.951841	1449	0.33543	0.66152	1	12113	0.33543
Arhgef28	8	0.068144	0.947767	1450	-0.49296	0.79676	1	15139	-0.49296
Serpini2	9	0.073426	0.951841	1451	-0.83834	0.72614	1	13468	-0.83834
Bcl3	9	0.073452	0.951841	1452	-0.91637	0.9515	1	17993	-0.91637
Slc7a7	10	0.074258	0.951841	1453	-0.4848	0.18885	1	3466	-0.4848
Map4k1	9	0.073692	0.951841	1454	-0.65443	0.50552	1	9435	-0.65443
Sulf2	10	0.074512	0.951841	1455	-0.71343	0.90502	1	16765	-0.71343
Epha3	9	0.073735	0.951841	1456	0.1437	0.49306	1	9174	0.1437
Fsd2	9	0.073759	0.951841	1457	-0.71207	0.73821	1	13777	-0.71207
Fut1	9	0.073909	0.951841	1458	-0.52417	0.50695	1	9466	-0.52417
Mkl2	9	0.073914	0.951841	1459	0.37741	0.40347	1	7553	0.37741
Prdm4	8	0.068757	0.947767	1460	-0.54996	0.8224	1	15535	-0.54996
Spata9	9	0.073984	0.951841	1461	-0.028952	0.080518	0.920812	1645	-0.028952
Gk5	8	0.068835	0.948149	1462	-0.331	0.10681	0.951576	2216	-0.331
Slc6a6	10	0.0749	0.951841	1463	-1.1197	0.99625	1	18958	-1.1197
Apol7a	10	0.074929	0.951841	1464	-0.71504	0.96985	1	18399	-0.71504
NC_27	4	0.054486	0.947662	1465	-0.69005	0.98318	1	18688	-0.69005
H2-Q10	10	0.075057	0.951841	1466	-0.58749	0.15888	1	2944	-0.58749
Acvr2a	8	0.069	0.949461	1467	-0.87846	0.92721	1	17601	-0.87846
2310014L17Rik	10	0.07508	0.951841	1468	0.79858	0.10105	0.946703	1974	0.79858
Ccdc170	10	0.075089	0.951841	1469	0.19186	0.63352	1	11542	0.19186
Riok2	10	0.075121	0.951841	1470	-0.48233	0.22221	1	4110	-0.48233
Dkk3	9	0.07429	0.951841	1471	-1.0798	0.55182	1	10430	-1.0798
Ak3	10	0.075201	0.951841	1472	-0.77841	0.29662	1	5382	-0.77841
Bin3	10	0.075229	0.951841	1473	-0.65954	0.9352	1	17507	-0.65954
Hormad1	10	0.075231	0.951841	1474	-0.9837	0.94384	1	17727	-0.9837
Brap	10	0.07524	0.951841	1475	-0.86488	0.59045	1	10724	-0.86488
Ran	10	0.07524	0.951841	1476	-0.59094	0.82472	1	15241	-0.59094
Spty2d1	9	0.074379	0.951841	1477	-0.99555	0.9545	1	18060	-0.99555
Kdm5b	9	0.074407	0.951841	1478	-1.1697	0.72818	1	13515	-1.1697
Taf3	10	0.075298	0.951841	1479	-0.82745	0.25051	1	4588	-0.82745
Rimbp3	9	0.074451	0.951841	1480	-0.33739	0.58448	1	10954	-0.33739
Mefv	10	0.07536	0.951841	1481	-0.64977	0.95511	1	18026	-0.64977
Cyp8b1	10	0.075448	0.951841	1482	-0.43398	0.65257	1	11941	-0.43398
Rdh16	10	0.075466	0.951841	1483	-0.061055	0.87671	1	16363	-0.061055
Tjap1	10	0.075484	0.951841	1484	-0.88547	0.81575	1	15053	-0.88547
Gm13177	10	0.075563	0.951841	1485	-0.83278	0.85969	1	16016	-0.83278
Stk35	10	0.075719	0.951841	1486	-0.81971	0.9077	1	16820	-0.81971
Il16	8	0.069698	0.950759	1487	0.10358	0.3938	1	7556	0.10358
Krt31	10	0.075864	0.951841	1488	-0.83137	0.80743	1	14869	-0.83137
Rab8a	9	0.074896	0.951841	1489	-0.31602	0.83854	1	15727	-0.31602
Foxm1	10	0.076154	0.951841	1490	-0.39564	0.055718	0.881422	1183	-0.39564
Ranbp9	10	0.076209	0.951841	1491	-0.8542	0.91566	1	17020	-0.8542
Mmrn2	8	0.070138	0.950759	1492	0.27657	0.5995	1	11319	0.27657
Scpep1	10	0.076349	0.951841	1493	-0.90291	0.94626	1	17787	-0.90291
Prokr2	10	0.076363	0.951841	1494	-1.0126	0.20647	1	3815	-1.0126
Hist1h2ab	10	0.076367	0.951841	1495	0.071581	0.20637	1	3813	0.071581
Klk11	9	0.075289	0.951841	1496	-0.83595	0.92722	1	17529	-0.83595
Taar4	10	0.076508	0.951841	1497	-1.0772	0.5912	1	10744	-1.0772
Ccdc42	10	0.076611	0.951841	1498	-0.87727	0.5835	1	10595	-0.87727
Defb15	10	0.07663	0.951841	1499	-0.79825	0.95903	1	18128	-0.79825
Cdh19	10	0.0767	0.951841	1500	-0.0708	0.093856	0.941808	1859	-0.0708
Fam170b	9	0.075694	0.951841	1501	-0.77427	0.57473	1	10806	-0.77427
Tmed1	10	0.076908	0.951841	1502	-0.86765	0.6467	1	11822	-0.86765
Arhgap33	10	0.076944	0.951841	1503	0.22888	0.92573	1	17259	0.22888
Ndst4	10	0.076944	0.951841	1504	-0.85751	0.25013	1	4579	-0.85751
Gml	8	0.070862	0.951841	1505	0.94501	0.11868	0.961027	2442	0.94501
Csmd2	10	0.077237	0.951841	1506	-0.77417	0.57635	1	10452	-0.77417
U2surp	10	0.077244	0.951841	1507	-0.42697	0.92479	1	17242	-0.42697
Foxi1	10	0.077356	0.951841	1508	-0.29178	0.37909	1	6934	-0.29178
Sema4b	8	0.071211	0.951841	1509	0.80923	0.074	0.907649	1635	0.80923
Zfp874b	9	0.076197	0.951841	1510	-0.2878	0.8496	1	15934	-0.2878
Doc2a	10	0.077535	0.951841	1511	-0.81333	0.86046	1	16035	-0.81333
Fscn2	9	0.076389	0.951841	1512	0.050133	0.39697	1	7459	0.050133
Zbed6	9	0.076389	0.951841	1513	-0.087921	0.098859	0.943056	1997	-0.087921
Sfpq	9	0.076389	0.951841	1514	0.34052	0.0076132	0.583065	246	0.34052
Clu	10	0.077655	0.951841	1515	-0.56556	0.81464	1	15033	-0.56556
Get4	10	0.077787	0.951841	1516	0.65238	0.14415	0.993677	2686	0.65238
Pank3	9	0.076514	0.951841	1517	-1.113	0.89493	1	16939	-1.113
Btg1	10	0.077868	0.951841	1518	-0.72377	0.7992	1	14686	-0.72377
Krtap12-1	9	0.076705	0.951841	1519	-0.67212	0.43401	1	8093	-0.67212
Sox15	10	0.078016	0.951841	1520	-0.3649	0.15844	1	2934	-0.3649
Hs1bp3	9	0.076769	0.951841	1521	-0.91407	0.76807	1	14469	-0.91407
Ccdc171	8	0.07193	0.951841	1522	-0.82764	0.91398	1	17431	-0.82764
Col1a1	10	0.07818	0.951841	1523	-0.15161	0.13372	0.977579	2522	-0.15161
Oas1h	9	0.077014	0.951841	1524	-0.69319	0.58209	1	10927	-0.69319
Thoc1	9	0.07702	0.951841	1525	-0.41605	0.81418	1	15291	-0.41605
Fmo2	10	0.078433	0.951841	1526	-0.76826	0.95078	1	17897	-0.76826
Arl10	10	0.078435	0.951841	1527	-0.84018	0.21619	1	3996	-0.84018
Fgfbp1	9	0.077081	0.951841	1528	-0.31026	0.44225	1	8211	-0.31026
A630095N17Rik	8	0.072254	0.951841	1529	-0.080761	0.52919	1	10280	-0.080761
A430105I19Rik	9	0.077173	0.951841	1530	-0.41213	0.65065	1	12090	-0.41213
Chst9	10	0.078568	0.951841	1531	-0.68072	0.861	1	16047	-0.68072
Ppfibp1	10	0.078568	0.951841	1532	-0.63257	0.72826	1	13359	-0.63257
Tubg1	9	0.077395	0.951841	1533	-0.031284	0.43175	1	8046	-0.031284
Hdac4	10	0.078866	0.951841	1534	-1.074	0.95625	1	18061	-1.074
Ric3	10	0.078904	0.951841	1535	-0.95869	0.44833	1	8266	-0.95869
Krtap11-1	10	0.078908	0.951841	1536	-0.76119	0.56731	1	10243	-0.76119
Zfp697	9	0.077464	0.951841	1537	-0.9266	0.88298	1	16633	-0.9266
Zfp780b	9	0.077571	0.951841	1538	-0.95283	0.92099	1	17403	-0.95283
Tmem69	10	0.079111	0.951841	1539	-0.26207	0.6042	1	10983	-0.26207
Fbxw26	10	0.079148	0.951841	1540	-0.87428	0.89094	1	16565	-0.87428
Oaz3	10	0.07944	0.951841	1541	-1.2637	0.55798	1	10095	-1.2637
Cct3	10	0.079514	0.951841	1542	0.81493	0.097842	0.943056	1927	0.81493
Hspa4l	10	0.079543	0.951841	1543	-0.53444	0.9579	1	18108	-0.53444
Mapkapk5	10	0.079631	0.951841	1544	-0.58072	0.94242	1	17697	-0.58072
Nek10	9	0.078061	0.951841	1545	-0.61821	0.98387	1	18703	-0.61821
Atxn2	10	0.079645	0.951841	1546	-0.92577	0.2876	1	5218	-0.92577
Myl2	10	0.079654	0.951841	1547	-0.12687	0.4212	1	7744	-0.12687
Il9	10	0.079726	0.951841	1548	-0.9194	0.30684	1	5564	-0.9194
Tmprss11f	9	0.07827	0.951841	1549	0.28017	0.58145	1	10918	0.28017
Cdkl3	9	0.07828	0.951841	1550	-0.79705	0.84524	1	15851	-0.79705
Kremen2	9	0.0783	0.951841	1551	-0.011427	0.90015	1	17036	-0.011427
Vill	8	0.073669	0.951841	1552	-0.5284	0.5069	1	9867	-0.5284
Gabbr2	10	0.080099	0.951841	1553	-0.94051	0.90918	1	16853	-0.94051
Sesn1	10	0.080106	0.951841	1554	0.12627	0.55883	1	10109	0.12627
Kctd3	10	0.080139	0.951841	1555	-0.54715	0.28277	1	5140	-0.54715
Rapgef6	8	0.073854	0.951841	1556	-0.78594	0.65304	1	12370	-0.78594
Capn10	10	0.080189	0.951841	1557	-0.021191	0.55701	1	10063	-0.021191
Nlgn2	9	0.078583	0.951841	1558	-0.048965	0.69034	1	12726	-0.048965
M6pr	9	0.078729	0.951841	1559	-0.82186	0.30104	1	5737	-0.82186
Gars	10	0.080394	0.951841	1560	0.78471	0.063686	0.900472	1318	0.78471
Abl1	10	0.080475	0.951841	1561	-0.38707	0.34505	1	6286	-0.38707
Gpr176	10	0.080543	0.951841	1562	-0.64473	0.69769	1	12798	-0.64473
Crisp4	10	0.080589	0.951841	1563	-0.21337	0.84126	1	15623	-0.21337
4930563E22Rik	8	0.074284	0.951841	1564	-0.18642	0.023778	0.741013	641	-0.18642
D630003M21Rik	9	0.079027	0.951841	1565	-0.50445	0.94982	1	17950	-0.50445
Slc38a9	10	0.080746	0.951841	1566	-0.86181	0.99218	1	18876	-0.86181
Duoxa1	9	0.079062	0.951841	1567	-0.3089	0.20832	1	3889	-0.3089
Tmem100	10	0.080801	0.951841	1568	-1.0603	0.67863	1	12434	-1.0603
Jph1	10	0.080875	0.951841	1569	-0.44177	0.46428	1	8571	-0.44177
Fbxl16	10	0.080879	0.951841	1570	0.50018	0.17878	1	3290	0.50018
Adra1a	9	0.07933	0.951841	1571	-0.46817	0.75942	1	14310	-0.46817
Mctp1	10	0.081073	0.951841	1572	-0.90899	0.79328	1	14551	-0.90899
Dnase1	10	0.081112	0.951841	1573	0.24785	0.69455	1	12720	0.24785
Arrb1	10	0.081147	0.951841	1574	-0.64385	0.98996	1	18821	-0.64385
Cep89	10	0.081173	0.951841	1575	0.017476	0.6168	1	11219	0.017476
Mtmr9	10	0.081173	0.951841	1576	1.37	0.0013859	0.298865	88	1.37
Tcp10a	10	0.081205	0.951841	1577	-0.85652	0.93169	1	17411	-0.85652
Fat2	9	0.079564	0.951841	1578	-1.1416	0.75713	1	14271	-1.1416
Fancc	10	0.081322	0.951841	1579	-0.41575	0.81868	1	15108	-0.41575
1700019A02Rik	9	0.079609	0.951841	1580	-0.99925	0.93997	1	17770	-0.99925
BC094916	10	0.081378	0.951841	1581	-0.60833	0.55602	1	10048	-0.60833
Slc10a4	10	0.081381	0.951841	1582	-0.89223	0.93885	1	17585	-0.89223
Zcchc12	8	0.075071	0.951841	1583	0.76974	0.36402	1	6911	0.76974
Armcx5	10	0.081406	0.951841	1584	-0.74	0.41382	1	7600	-0.74
Rpl39l	8	0.075279	0.951841	1585	-0.34224	0.98566	1	18742	-0.34224
Ago1	9	0.079834	0.951841	1586	0.40402	0.3083	1	5899	0.40402
Ptges2	10	0.08171	0.953667	1587	-0.89422	0.98192	1	18666	-0.89422
Slc25a45	9	0.079933	0.951841	1588	-1.3415	0.9466	1	17886	-1.3415
4833423E24Rik	9	0.079978	0.951841	1589	-0.6136	0.59188	1	11087	-0.6136
Timm21	10	0.081935	0.954843	1590	-1.0473	0.54887	1	9939	-1.0473
Cpsf2	9	0.080353	0.951841	1591	0.5498	0.44225	1	8213	0.5498
Tmem170b	10	0.082277	0.955973	1592	-0.72522	0.77143	1	14091	-0.72522
Zfp719	9	0.080392	0.951841	1593	-0.60929	0.6051	1	11306	-0.60929
Tmem209	9	0.080392	0.951841	1594	-0.3824	0.36666	1	6905	-0.3824
Trim27	9	0.080435	0.951841	1595	-0.54225	0.98632	1	18752	-0.54225
Atp6v1g2	10	0.08233	0.955973	1596	-0.56466	0.99174	1	18862	-0.56466
NC_48	4	0.060455	0.947767	1597	-0.54035	0.31186	1	7662	-0.54035
Fbxl18	9	0.080549	0.951841	1598	-1.1512	0.90523	1	17128	-1.1512
Dnajc1	9	0.080589	0.951841	1599	-0.50043	0.16086	1	3074	-0.50043
Wdr44	10	0.082561	0.955973	1600	-1.0956	0.97941	1	18610	-1.0956
Arhgap20	10	0.082593	0.955973	1601	-0.46126	0.72961	1	13380	-0.46126
Npffr2	10	0.082593	0.955973	1602	-0.25358	0.40171	1	7393	-0.25358
Msantd4	10	0.082649	0.955973	1603	0.53754	0.38641	1	7087	0.53754
Stk32a	10	0.082722	0.955973	1604	-0.59215	0.85616	1	15943	-0.59215
Dpp4	10	0.082772	0.955973	1605	-0.71676	0.77963	1	14240	-0.71676
Ythdc2	7	0.072807	0.951841	1606	-0.94884	0.39447	1	8049	-0.94884
Gdf6	10	0.082888	0.955973	1607	-0.91105	0.43587	1	8031	-0.91105
Slc25a18	9	0.080927	0.951841	1608	-0.55748	0.51812	1	9710	-0.55748
Loxhd1	10	0.082891	0.955973	1609	-0.44434	0.56772	1	10248	-0.44434
Chil6	8	0.076561	0.951841	1610	-1.2176	0.80222	1	15221	-1.2176
Gpr50	10	0.083003	0.955973	1611	-0.99423	0.7303	1	13389	-0.99423
Calcoco2	10	0.083012	0.955973	1612	-0.73774	0.84327	1	15657	-0.73774
Usp49	10	0.083024	0.955973	1613	-0.76318	0.84934	1	15785	-0.76318
Irgm2	7	0.073011	0.951841	1614	0.25525	0.20599	1	4226	0.25525
Hoxc4	10	0.083089	0.955973	1615	-1.1049	0.90438	1	16749	-1.1049
Ovch2	10	0.083205	0.955973	1616	-0.12194	0.97854	1	18595	-0.12194
Emc3	9	0.081211	0.951841	1617	0.75245	0.11087	0.958741	2230	0.75245
Gm5938	9	0.081308	0.951841	1618	-0.85808	0.72315	1	13394	-0.85808
Wbp5	9	0.081392	0.951841	1619	0.23796	0.20358	1	3806	0.23796
Htr2b	9	0.081438	0.951841	1620	-0.71857	0.45573	1	8445	-0.71857
Pdgfb	10	0.083504	0.955973	1621	-0.46582	0.43274	1	7967	-0.46582
Prl	10	0.083504	0.955973	1622	-0.60005	0.68639	1	12575	-0.60005
Ccdc178	10	0.083568	0.955973	1623	0.041167	0.12291	0.963657	2347	0.041167
Elf3	10	0.083597	0.955973	1624	-0.5042	0.73209	1	13413	-0.5042
Sbno1	9	0.081644	0.953487	1625	-0.51766	0.057292	0.884546	1236	-0.51766
Pard6b	10	0.083725	0.955973	1626	-0.20819	0.59052	1	10726	-0.20819
Rpl10a	8	0.077497	0.951841	1627	-1.1749	0.091128	0.941728	1946	-1.1749
Gm8300	4	0.061513	0.947767	1628	-1.7	0.93805	1	17769	-1.7
Lhfpl1	10	0.0839	0.955973	1629	-0.73496	0.56324	1	10174	-0.73496
Ebf3	10	0.084013	0.955973	1630	-0.80211	0.99304	1	18897	-0.80211
Dkkl1	8	0.07766	0.951841	1631	1.0895	0.027623	0.769679	707	1.0895
Supt20	9	0.081961	0.954843	1632	-0.11827	0.6042	1	11290	-0.11827
Ccl11	10	0.084331	0.955973	1633	-0.98394	0.96803	1	18358	-0.98394
Ppp1r42	8	0.077965	0.951841	1634	-0.68423	0.82346	1	15552	-0.68423
Tex264	10	0.084466	0.955973	1635	-0.37316	0.78317	1	14323	-0.37316
Abca5	10	0.084466	0.955973	1636	-0.3663	0.81095	1	14933	-0.3663
Cep76	10	0.08457	0.955973	1637	-0.79799	0.51699	1	9428	-0.79799
Exd2	10	0.08457	0.955973	1638	-0.55458	0.60666	1	11028	-0.55458
Csf2rb	10	0.08457	0.955973	1639	-0.3736	0.61859	1	11255	-0.3736
Car5b	9	0.082418	0.955973	1640	-0.38689	0.43196	1	8051	-0.38689
Proz	10	0.084588	0.955973	1641	-0.59766	0.68251	1	12501	-0.59766
Zfp40	7	0.07432	0.951841	1642	-0.59426	0.80394	1	15855	-0.59426
Axin2	8	0.078356	0.951841	1643	-0.73802	0.89686	1	17205	-0.73802
Scgb1b7	7	0.074426	0.951841	1644	-0.79995	0.82848	1	16462	-0.79995
Scgb1b29	7	0.074426	0.951841	1645	-0.79995	0.82848	1	16463	-0.79995
Lrat	9	0.082559	0.955973	1646	-0.93495	0.77953	1	14681	-0.93495
Rpl7	8	0.078432	0.951841	1647	0.69363	0.020971	0.724473	581	0.69363
Hdgfrp3	8	0.078432	0.951841	1648	0.44292	0.21301	1	4221	0.44292
Btnl4	8	0.078444	0.951841	1649	-1.1481	0.8821	1	17010	-1.1481
Cyp4a10	10	0.084833	0.955973	1650	-0.38746	0.46002	1	8484	-0.38746
Snrnp200	9	0.082739	0.955973	1651	1.2072	0.007064	0.574659	237	1.2072
Rnh1	10	0.085068	0.955973	1652	-0.55097	0.99902	1	19009	-0.55097
Gpr19	10	0.08508	0.955973	1653	-0.73694	0.34982	1	6368	-0.73694
Kif11	10	0.08521	0.955973	1654	-0.15034	0.22646	1	4186	-0.15034
Papolg	10	0.085245	0.955973	1655	-0.98529	0.89237	1	16589	-0.98529
Mpp6	10	0.085262	0.955973	1656	-0.49773	0.31122	1	5648	-0.49773
Snx3	10	0.085295	0.955973	1657	-0.79519	0.9437	1	17723	-0.79519
Ube2v1	10	0.085342	0.955973	1658	-0.79026	0.74822	1	13680	-0.79026
Tmc6	9	0.083132	0.955973	1659	-0.85655	0.64201	1	11948	-0.85655
Ppp2cb	10	0.085373	0.955973	1660	-0.068403	0.33098	1	5997	-0.068403
Ppp2r5d	10	0.085513	0.956789	1661	-0.66303	0.7187	1	13202	-0.66303
Tmem255b	10	0.085596	0.956789	1662	0.48842	0.1469	0.997308	2743	0.48842
Shisa9	10	0.085697	0.957083	1663	-0.78374	0.48694	1	8952	-0.78374
Cobl	10	0.085723	0.957083	1664	-1.1235	0.66878	1	12249	-1.1235
Zfp101	9	0.083493	0.955973	1665	-0.48056	0.30729	1	5888	-0.48056
AU021092	9	0.083519	0.955973	1666	-1.1947	0.99195	1	18869	-1.1947
Hist1h1b	9	0.083539	0.955973	1667	0.33702	0.32409	1	6191	0.33702
Epo	9	0.083539	0.955973	1668	-0.39193	0.59887	1	11188	-0.39193
Tsg101	10	0.085953	0.957783	1669	-0.50116	0.91721	1	17061	-0.50116
Man2a1	10	0.086118	0.957783	1670	-0.97342	0.38095	1	6974	-0.97342
Fam86	9	0.083793	0.955973	1671	-0.82821	0.97615	1	18542	-0.82821
Rictor	9	0.08382	0.955973	1672	-0.41048	0.42901	1	7999	-0.41048
Cdv3	9	0.08386	0.955973	1673	-0.40578	0.067735	0.907649	1394	-0.40578
Gpr171	10	0.086242	0.957783	1674	-0.31583	0.81946	1	15122	-0.31583
Brsk1	9	0.084027	0.955973	1675	-1.0616	0.82873	1	15564	-1.0616
Mgat4c	9	0.084136	0.955973	1676	0.10435	0.66712	1	12361	0.10435
Nr2f1	10	0.086529	0.957783	1677	0.12438	0.01144	0.655889	325	0.12438
Cfhr1	10	0.086551	0.957783	1678	-0.80878	0.9763	1	18546	-0.80878
Ppwd1	9	0.084292	0.955973	1679	0.87431	0.12836	0.971712	2561	0.87431
1700029I15Rik	8	0.080408	0.951841	1680	-0.63937	0.064616	0.905028	1425	-0.63937
Crtac1	10	0.086913	0.957783	1681	-0.73418	0.48574	1	8928	-0.73418
Angptl6	9	0.084496	0.955973	1682	-0.2754	0.28536	1	5390	-0.2754
Cdh11	10	0.08693	0.957783	1683	-0.36852	0.98999	1	18822	-0.36852
Btk	8	0.080491	0.951841	1684	-0.81777	0.29645	1	5835	-0.81777
Mier3	10	0.086952	0.957783	1685	-0.44021	0.60561	1	11009	-0.44021
Gm5936	9	0.084536	0.955973	1686	0.17982	0.31761	1	6071	0.17982
Vpreb2	8	0.08054	0.951841	1687	-0.72352	0.96058	1	18177	-0.72352
Ikbkb	10	0.087046	0.957783	1688	-0.91339	0.95759	1	18096	-0.91339
Rmi2	10	0.08714	0.957783	1689	-0.26643	0.74561	1	13633	-0.26643
Epb4.2	9	0.084665	0.955973	1690	-0.75951	0.86841	1	16247	-0.75951
Map7	10	0.087183	0.957783	1691	0.37994	0.40735	1	7496	0.37994
Dbx2	8	0.080727	0.951841	1692	-0.81398	0.71641	1	13836	-0.81398
Tuba1a	10	0.087263	0.957783	1693	-0.23989	0.75811	1	13850	-0.23989
Zfp62	8	0.080813	0.951841	1694	-0.8326	0.77294	1	14799	-0.8326
Sema6c	9	0.084881	0.955973	1695	-0.43265	0.86201	1	16154	-0.43265
R3hdm4	10	0.087376	0.957783	1696	-0.67746	0.77836	1	14218	-0.67746
Myrip	10	0.087393	0.957783	1697	-0.27371	0.70039	1	12848	-0.27371
Cdc26	9	0.084935	0.955973	1698	0.58158	0.22706	1	4215	0.58158
Paqr8	9	0.08497	0.955973	1699	-0.73444	0.53636	1	10091	-0.73444
Adam22	8	0.081049	0.951841	1700	-0.64252	0.85186	1	16434	-0.64252
Gm166	10	0.087539	0.957783	1701	-0.4846	0.43526	1	8019	-0.4846
Rusc1	9	0.085092	0.955973	1702	-0.17468	0.68374	1	12628	-0.17468
4930529M08Rik	10	0.087671	0.957783	1703	-0.32817	0.36471	1	6647	-0.32817
Nicn1	10	0.087689	0.957783	1704	-0.20911	0.35224	1	6412	-0.20911
Rhot2	10	0.087748	0.957783	1705	-0.39723	0.39467	1	7243	-0.39723
Triqk	6	0.073731	0.951841	1706	0.78334	0.12014	0.961926	2689	0.78334
Haus8	10	0.088005	0.957783	1707	0.21173	0.089686	0.934066	1793	0.21173
Zfand1	9	0.085556	0.956789	1708	-1.2984	0.85713	1	16076	-1.2984
Dnase2b	10	0.088216	0.957783	1709	-0.89333	0.3825	1	7008	-0.89333
Ttll5	10	0.088265	0.957783	1710	-0.075795	0.71293	1	13096	-0.075795
Zdhhc3	8	0.081835	0.954545	1711	-1.1164	0.1441	0.993677	2826	-1.1164
Ifna13	9	0.085855	0.957783	1712	-1.1572	0.81047	1	15222	-1.1572
Fbxw10	10	0.088515	0.957783	1713	-0.018017	0.10875	0.956598	2105	-0.018017
Xrra1	9	0.085927	0.957783	1714	-0.68013	0.51472	1	9637	-0.68013
Sh3rf2	10	0.088594	0.957783	1715	-0.94939	0.15764	1	2915	-0.94939
Afm	10	0.088607	0.957783	1716	-0.58124	0.77894	1	14226	-0.58124
Dcaf11	10	0.088726	0.957783	1717	-0.36866	0.92193	1	17184	-0.36866
Ube4a	10	0.088745	0.957783	1718	-0.68074	0.93969	1	17613	-0.68074
Med4	8	0.082338	0.955973	1719	-0.70862	0.59296	1	11215	-0.70862
Ubd	10	0.088964	0.957783	1720	-0.58782	0.3648	1	6649	-0.58782
7420426K07Rik	9	0.086305	0.957783	1721	0.05202	0.71284	1	13135	0.05202
Serpina1b	10	0.089009	0.957783	1722	-0.98555	0.52317	1	9535	-0.98555
Kdm6b	10	0.089022	0.957783	1723	-0.10955	0.1031	0.946703	2009	-0.10955
Fpr-rs4	9	0.086396	0.957783	1724	-0.93918	0.86803	1	16242	-0.93918
Tmem51	10	0.089079	0.957783	1725	-0.82925	0.87882	1	16400	-0.82925
Mx2	10	0.089081	0.957783	1726	-1.1784	0.8796	1	16410	-1.1784
Ttc1	7	0.077997	0.951841	1727	-1.0609	0.91267	1	17455	-1.0609
Nr4a3	8	0.082626	0.955973	1728	-1.0175	0.25902	1	5098	-1.0175
Wee2	7	0.078029	0.951841	1729	-1.2397	0.88118	1	17144	-1.2397
Srpx2	10	0.089297	0.957783	1730	-0.66595	0.61541	1	11186	-0.66595
4931429L15Rik	9	0.0866	0.957783	1731	-0.90896	0.84184	1	15790	-0.90896
Kcnk7	9	0.086662	0.957783	1732	-0.65829	0.62576	1	11646	-0.65829
Mfge8	9	0.086671	0.957783	1733	-1.0584	0.77104	1	14526	-1.0584
Rell2	9	0.08668	0.957783	1734	-0.43544	0.66108	1	12255	-0.43544
Dzip3	10	0.089414	0.957783	1735	0.12618	0.7067	1	12967	0.12618
Prr11	10	0.089421	0.957783	1736	-0.019883	0.80242	1	14761	-0.019883
Mki67	10	0.0895	0.957783	1737	-0.003736	0.020901	0.724473	533	-0.003736
Dsc3	10	0.089509	0.957783	1738	-0.63089	0.96337	1	18238	-0.63089
Anks3	9	0.086983	0.957783	1739	-0.74007	0.76032	1	14332	-0.74007
C1qc	10	0.089882	0.958893	1740	-0.43749	0.71489	1	13140	-0.43749
Eml5	10	0.08997	0.958893	1741	-0.35764	0.28504	1	5163	-0.35764
Stt3a	8	0.083493	0.955973	1742	-0.60823	0.99274	1	18890	-0.60823
Ankrd45	10	0.090066	0.958893	1743	-1.0478	0.54358	1	9862	-1.0478
Nupr1l	10	0.090066	0.958893	1744	-0.42869	0.806	1	14834	-0.42869
Tm2d3	10	0.090123	0.958965	1745	-0.52768	0.22813	1	4219	-0.52768
Zfp707	8	0.083662	0.955973	1746	-1.0801	0.58504	1	11111	-1.0801
Tmem198	9	0.087405	0.957783	1747	-0.049766	0.10354	0.946703	2087	-0.049766
Cisd2	10	0.09026	0.959125	1748	-0.10014	0.2533	1	4646	-0.10014
Foxa1	9	0.087515	0.957783	1749	-1.1484	0.32644	1	6239	-1.1484
Stx16	10	0.0904	0.959125	1750	-0.69103	0.43628	1	8039	-0.69103
Cwc22	10	0.090458	0.959125	1751	0.25671	0.41146	1	7564	0.25671
Rgs4	9	0.08773	0.957783	1752	-0.17049	0.89671	1	16964	-0.17049
Ewsr1	9	0.087981	0.957783	1753	-0.83284	0.6295	1	11713	-0.83284
Pp2d1	8	0.084372	0.955973	1754	-0.16682	0.58177	1	11063	-0.16682
Ctxn2	9	0.08801	0.957783	1755	-0.121	0.94654	1	17885	-0.121
Eepd1	10	0.090955	0.959125	1756	-0.43834	0.45791	1	8442	-0.43834
Krtap5-3	10	0.091047	0.959125	1757	-0.69712	0.91128	1	16906	-0.69712
Cyp2b19	10	0.091066	0.959125	1758	-0.17514	0.18709	1	3438	-0.17514
Khnyn	9	0.088117	0.957783	1759	-0.53148	0.72439	1	13424	-0.53148
Tmem151b	10	0.091181	0.959125	1760	-0.78194	0.9289	1	17341	-0.78194
Prkar2a	9	0.088247	0.957783	1761	-0.23989	0.45384	1	8416	-0.23989
Crip2	9	0.088247	0.957783	1762	-0.37926	0.89362	1	16912	-0.37926
Tmem251	10	0.091264	0.959125	1763	-1.0402	0.89856	1	16673	-1.0402
Vps26a	10	0.091379	0.959125	1764	-0.64454	0.87985	1	16413	-0.64454
Arhgdib	10	0.091437	0.959125	1765	0.30989	0.29045	1	5270	0.30989
Trim10	10	0.091476	0.959125	1766	-0.82851	0.95765	1	18100	-0.82851
Dnm1l	9	0.088484	0.957783	1767	-0.64036	0.98884	1	18804	-0.64036
Ormdl3	10	0.091554	0.959125	1768	-0.78036	0.64056	1	11684	-0.78036
Zfp592	9	0.088561	0.957783	1769	0.32269	0.73598	1	13711	0.32269
Lpcat3	10	0.091622	0.959125	1770	-0.23344	0.63234	1	11519	-0.23344
Tmem215	9	0.088595	0.957783	1771	-0.9	0.58245	1	10933	-0.9
Bora	9	0.088736	0.957783	1772	-1.1777	0.60766	1	11341	-1.1777
Siglec1	9	0.088768	0.957783	1773	-0.36019	0.54438	1	10268	-0.36019
Mfap2	10	0.091868	0.959125	1774	-0.18879	0.48309	1	8884	-0.18879
Fev	10	0.091943	0.959125	1775	-1.0826	0.9453	1	17766	-1.0826
Tbc1d16	10	0.091985	0.959125	1776	0.092692	0.3515	1	6399	0.092692
Kctd1	10	0.091988	0.959125	1777	0.21569	0.24788	1	4547	0.21569
Sprr3	9	0.088918	0.957783	1778	-0.061318	0.83204	1	15629	-0.061318
Plekhg5	8	0.085371	0.955973	1779	0.42058	0.10335	0.946703	2157	0.42058
Tex2	10	0.092131	0.959938	1780	-0.56985	0.29744	1	5397	-0.56985
Antxrl	10	0.092198	0.960106	1781	-0.90688	0.12981	0.971712	2465	-0.90688
Sin3a	10	0.092317	0.960821	1782	-0.24115	0.070321	0.907649	1428	-0.24115
Ccdc64b	9	0.089345	0.957783	1783	-0.8337	0.36745	1	6922	-0.8337
Mcm6	10	0.092533	0.9613	1784	-0.29281	0.53653	1	9747	-0.29281
Vangl1	10	0.092543	0.9613	1785	-0.75624	0.70987	1	13041	-0.75624
Olah	9	0.089394	0.957783	1786	-0.88087	0.59278	1	11102	-0.88087
Acsm2	10	0.092607	0.9613	1787	-0.54839	0.58292	1	10583	-0.54839
Lrp6	9	0.08949	0.957783	1788	-0.11293	0.63013	1	11729	-0.11293
Cym	8	0.086111	0.957783	1789	-0.2602	0.87467	1	16908	-0.2602
Cys1	10	0.092844	0.9613	1790	-0.81744	0.72112	1	13242	-0.81744
4932429P05Rik	10	0.092994	0.9613	1791	-0.036592	0.63627	1	11596	-0.036592
Gmcl1	7	0.081315	0.951841	1792	-1.1633	0.25337	1	5058	-1.1633
Spry2	10	0.093108	0.9613	1793	-0.9814	0.99705	1	18971	-0.9814
Slc25a27	10	0.09315	0.9613	1794	-0.46975	0.21281	1	3940	-0.46975
2810021J22Rik	9	0.089973	0.958893	1795	-0.49998	0.6001	1	11211	-0.49998
Gm6432	9	0.090007	0.958893	1796	-1.0139	0.86808	1	16244	-1.0139
Rps27rt	7	0.081454	0.951841	1797	-0.23181	0.51914	1	10184	-0.23181
Rps27	7	0.081454	0.951841	1798	-0.23181	0.51914	1	10185	-0.23181
Zfp2	8	0.086663	0.957783	1799	-0.97153	0.47561	1	9284	-0.97153
Slc22a16	10	0.09343	0.9613	1800	-0.70738	0.88609	1	16501	-0.70738
Cpt2	10	0.093495	0.9613	1801	-0.50791	0.47574	1	8771	-0.50791
Gpsm3	10	0.093504	0.9613	1802	-1.0531	0.48061	1	8847	-1.0531
Tmem70	10	0.093515	0.9613	1803	0.026178	0.9359	1	17526	0.026178
Dolpp1	10	0.093555	0.9613	1804	-0.91684	0.78811	1	14429	-0.91684
Wdr5b	10	0.093572	0.9613	1805	-0.74764	0.074431	0.908248	1527	-0.74764
Ostc	10	0.0936	0.9613	1806	-0.5984	0.72457	1	13311	-0.5984
Itgb1	10	0.093626	0.9613	1807	-0.098363	0.20753	1	3838	-0.098363
Raver1	9	0.090486	0.959125	1808	-1.1583	0.49335	1	9182	-1.1583
Atp11b	10	0.093805	0.961376	1809	-0.44405	0.11728	0.961027	2254	-0.44405
Luzp2	9	0.090692	0.959125	1810	-1.0934	0.4655	1	8616	-1.0934
Rnf125	10	0.094016	0.961376	1811	-0.71796	0.53563	1	9728	-0.71796
Plcg2	10	0.094021	0.961376	1812	-0.98958	0.91119	1	16901	-0.98958
Ptgs2	9	0.090735	0.959125	1813	-1.2645	0.83276	1	15640	-1.2645
Hoxc8	9	0.090799	0.959125	1814	-0.67914	0.91069	1	17219	-0.67914
Atp6v1b2	9	0.090814	0.959125	1815	-0.14501	0.49661	1	9244	-0.14501
Vps37b	9	0.090814	0.959125	1816	0.013576	0.23536	1	4338	0.013576
Ccdc80	8	0.087516	0.957783	1817	-0.39074	0.44251	1	8661	-0.39074
Als2	8	0.08757	0.957783	1818	-1.1836	0.3771	1	7182	-1.1836
Txndc16	10	0.094323	0.961376	1819	-0.90706	0.94084	1	17644	-0.90706
Gm8720	6	0.079626	0.951841	1820	-0.51839	0.30029	1	6451	-0.51839
Gm5725	6	0.079626	0.951841	1821	-0.51839	0.30029	1	6452	-0.51839
Car11	9	0.091058	0.959125	1822	0.78745	0.037148	0.820352	890	0.78745
Slc33a1	10	0.094399	0.961376	1823	-0.81325	0.67692	1	12398	-0.81325
Prex1	9	0.091067	0.959125	1824	-0.49141	0.92101	1	17404	-0.49141
Gng3	9	0.09107	0.959125	1825	-0.88473	0.29975	1	5712	-0.88473
Atp8b1	10	0.094424	0.961376	1826	-1.0228	0.47009	1	8681	-1.0228
Krt79	9	0.091146	0.959125	1827	-1.3263	0.73186	1	13615	-1.3263
Hnrnpd	10	0.094545	0.961376	1828	-0.97142	0.90404	1	16747	-0.97142
Snrpd3	10	0.094661	0.961376	1829	-0.7393	0.43895	1	8102	-0.7393
Baat	10	0.094661	0.961376	1830	-0.27661	0.84685	1	15728	-0.27661
Wdr3	10	0.094661	0.961376	1831	-0.016457	0.71232	1	13080	-0.016457
Lhx5	10	0.094776	0.961702	1832	-0.12654	0.77295	1	14117	-0.12654
2300003K06Rik	8	0.088157	0.957783	1833	-0.84639	0.92702	1	17597	-0.84639
Cryba2	9	0.091429	0.959125	1834	-1.0443	0.86046	1	16133	-1.0443
Cpne8	8	0.088411	0.957783	1835	-0.24555	0.77058	1	14768	-0.24555
Hells	10	0.09516	0.962926	1836	-0.80317	0.60206	1	10942	-0.80317
Calca	10	0.095259	0.962926	1837	-0.25204	0.50101	1	9185	-0.25204
Ubl3	10	0.095264	0.962926	1838	-0.38579	0.86368	1	16108	-0.38579
Tmem189	9	0.091874	0.959125	1839	0.28608	0.64436	1	11980	0.28608
Krtap5-1	10	0.095344	0.962926	1840	-0.82489	0.6617	1	12116	-0.82489
Apln	9	0.091903	0.959125	1841	-0.77513	0.48088	1	8896	-0.77513
Prelid2	10	0.095504	0.962926	1842	-0.078076	0.29701	1	5389	-0.078076
Phc1	10	0.095741	0.963418	1843	0.31905	0.34939	1	6360	0.31905
Ppil4	10	0.095741	0.963418	1844	0.5729	0.012843	0.669034	363	0.5729
Il11ra1	8	0.089166	0.957783	1845	-0.85322	0.9227	1	17546	-0.85322
Gnl1	10	0.095905	0.963753	1846	-0.91823	0.79549	1	14600	-0.91823
Msrb2	8	0.089372	0.957783	1847	-1.0928	0.93684	1	17749	-1.0928
Zcchc10	9	0.092677	0.9613	1848	-0.63765	0.86951	1	16272	-0.63765
Acin1	9	0.092714	0.9613	1849	-0.53599	0.34319	1	6505	-0.53599
Dcbld2	10	0.096302	0.964318	1850	0.19491	0.48376	1	8899	0.19491
Tcl1	10	0.096372	0.964318	1851	0.071886	0.95979	1	18155	0.071886
Bsdc1	9	0.092867	0.9613	1852	-0.68728	0.95392	1	18048	-0.68728
Dph2	9	0.092883	0.9613	1853	0.67292	0.10268	0.946703	2070	0.67292
Dmrta1	10	0.09652	0.964318	1854	-0.82164	0.17374	1	3200	-0.82164
Gm2696	8	0.089875	0.958893	1855	-0.47383	0.66524	1	12679	-0.47383
Parva	10	0.096577	0.964318	1856	-0.75226	0.98111	1	18649	-0.75226
Trappc6a	9	0.09306	0.9613	1857	-0.98154	0.85992	1	16125	-0.98154
Cenpl	8	0.090024	0.958893	1858	-0.76144	0.73857	1	14295	-0.76144
Wdfy2	10	0.096712	0.964318	1859	-0.8078	0.92162	1	17183	-0.8078
Stard13	10	0.096956	0.964318	1860	-0.96577	0.8323	1	15409	-0.96577
Hmgn1	10	0.096962	0.964318	1861	-0.59945	0.57105	1	10329	-0.59945
Sfxn4	10	0.096979	0.964318	1862	-0.40066	0.69562	1	12744	-0.40066
Tns1	9	0.093466	0.9613	1863	-0.14125	0.74182	1	13867	-0.14125
Cep350	10	0.097227	0.96505	1864	-0.75557	0.072943	0.907649	1493	-0.75557
Chst5	10	0.097324	0.96505	1865	-0.84416	0.64867	1	11858	-0.84416
Trim66	8	0.090629	0.959125	1866	-1.0091	0.78788	1	15022	-1.0091
Med15	10	0.097343	0.96505	1867	-0.31767	0.18127	1	3333	-0.31767
Gsr	8	0.090716	0.959125	1868	-0.96385	0.98631	1	18758	-0.96385
Stxbp6	10	0.097482	0.96505	1869	-0.24607	0.80875	1	14896	-0.24607
Zfp280d	8	0.090793	0.959125	1870	-0.080421	0.61834	1	11586	-0.080421
Plcg1	10	0.097527	0.96505	1871	0.85811	0.047998	0.861298	1040	0.85811
Clasrp	9	0.093881	0.961376	1872	-0.92604	0.88743	1	16760	-0.92604
Ap3b1	9	0.093952	0.961376	1873	-0.51168	0.6461	1	12015	-0.51168
Prcc	10	0.09781	0.96505	1874	0.37982	0.15607	1	2888	0.37982
Alyref2	9	0.094131	0.961376	1875	-0.96243	0.36085	1	6794	-0.96243
Vps13b	10	0.097884	0.96505	1876	-0.92959	0.90511	1	16766	-0.92959
Alyref	9	0.094268	0.961376	1877	-0.90911	0.64861	1	12063	-0.90911
Shfm1	10	0.098054	0.96505	1878	-0.73617	0.59368	1	10787	-0.73617
Nxph3	10	0.09809	0.96505	1879	0.15167	0.28186	1	5127	0.15167
Men1	10	0.098447	0.96505	1880	-0.85419	0.18231	1	3353	-0.85419
Ppil6	9	0.094669	0.961376	1881	0.20279	0.42104	1	7850	0.20279
1700031F05Rik	10	0.098466	0.96505	1882	-0.085632	0.56516	1	10205	-0.085632
Atp6v0a2	9	0.094693	0.961376	1883	0.58816	0.33424	1	6348	0.58816
Helt	8	0.091804	0.959125	1884	-1.21	0.98464	1	18718	-1.21
2010106E10Rik	10	0.098575	0.96505	1885	-0.86244	0.65793	1	12056	-0.86244
Ecm1	10	0.098575	0.96505	1886	-0.94003	0.65479	1	11985	-0.94003
Uxs1	9	0.094836	0.961802	1887	-0.46309	0.93149	1	17589	-0.46309
Gid4	10	0.098671	0.96505	1888	0.25836	0.25857	1	4731	0.25836
Tfap2e	8	0.091917	0.959125	1889	-0.65019	0.44431	1	8704	-0.65019
Fam227b	8	0.092003	0.959125	1890	-0.17421	0.64482	1	12161	-0.17421
Stac	10	0.098914	0.96505	1891	-0.91514	0.89017	1	16558	-0.91514
5031410I06Rik	9	0.09511	0.962926	1892	-1.1917	0.91866	1	17361	-1.1917
Galnt4	10	0.098975	0.96505	1893	-0.67528	0.75383	1	13765	-0.67528
Akap12	9	0.095204	0.962926	1894	-0.48022	0.80196	1	15076	-0.48022
Ticam2	9	0.095422	0.962926	1895	-0.48698	0.66273	1	12283	-0.48698
D10Wsu102e	10	0.099344	0.96505	1896	-0.87463	0.97775	1	18577	-0.87463
Irf1	9	0.095444	0.962926	1897	-0.21129	0.24912	1	4629	-0.21129
Pet100	10	0.099347	0.96505	1898	-0.74316	0.89696	1	16653	-0.74316
Cenpf	9	0.095461	0.962926	1899	-0.27902	0.92054	1	17396	-0.27902
Pax8	10	0.099405	0.96505	1900	-0.71486	0.95258	1	17941	-0.71486
Slit1	8	0.09267	0.9613	1901	0.49805	0.15619	1	3030	0.49805
Cxcr2	9	0.095587	0.963255	1902	-0.64675	0.97515	1	18513	-0.64675
E2f5	10	0.099563	0.96505	1903	-0.98384	0.84973	1	15801	-0.98384
Insc	10	0.099571	0.96505	1904	-0.21834	0.7567	1	13822	-0.21834
Nmi	9	0.095755	0.963418	1905	0.2267	0.56208	1	10604	0.2267
Glt8d1	10	0.099757	0.96505	1906	-0.74938	0.92779	1	17312	-0.74938
Lhfpl4	10	0.099757	0.96505	1907	-0.98976	0.94902	1	17856	-0.98976
Tyw1	10	0.099772	0.96505	1908	-0.71115	0.46944	1	8668	-0.71115
Gdf15	10	0.099816	0.96505	1909	-0.75536	0.93296	1	17456	-0.75536
Gja5	10	0.099821	0.96505	1910	-0.85678	0.65257	1	11944	-0.85678
Cgn	9	0.095904	0.963753	1911	-0.66168	0.61409	1	11446	-0.66168
Carf	9	0.09594	0.963753	1912	-0.9906	0.80454	1	15117	-0.9906
Pnn	10	0.09997	0.965454	1913	0.52142	0.46332	1	8551	0.52142
Tex11	10	0.10001	0.965454	1914	-0.504	0.81535	1	15043	-0.504
Pan3	10	0.10008	0.965613	1915	-0.52735	0.66918	1	12256	-0.52735
Pfn4	7	0.087092	0.957783	1916	-0.3121	0.63999	1	12718	-0.3121
Cyp2c44	9	0.096289	0.964318	1917	-0.79753	0.82917	1	15575	-0.79753
Zfyve27	8	0.09354	0.9613	1918	-0.54915	0.91459	1	17445	-0.54915
Klhl25	9	0.096349	0.964318	1919	-0.44368	0.45993	1	8530	-0.44368
Scml4	10	0.10042	0.966445	1920	-1.0094	0.2016	1	3705	-1.0094
Mybpc3	10	0.10042	0.966445	1921	-0.32746	0.041831	0.829251	923	-0.32746
Rhox3h	8	0.093712	0.9613	1922	-1.1306	0.26379	1	5168	-1.1306
Smox	8	0.093726	0.9613	1923	-0.50796	0.64258	1	12108	-0.50796
Cyp2c39	9	0.096523	0.964318	1924	-0.85835	0.89217	1	16885	-0.85835
1700008F21Rik	9	0.096547	0.964318	1925	-0.92856	0.85604	1	16051	-0.92856
A3galt2	9	0.096637	0.964318	1926	-1.0771	0.92054	1	17398	-1.0771
Tec	9	0.096684	0.964318	1927	-1.0078	0.86885	1	16265	-1.0078
Irgm1	10	0.10078	0.967489	1928	-0.84175	0.67826	1	12425	-0.84175
Wdfy4	10	0.10078	0.967489	1929	-0.47399	0.9881	1	18787	-0.47399
Nus1	10	0.10078	0.967489	1930	-0.29057	0.056756	0.884546	1197	-0.29057
Tspan12	10	0.10095	0.968588	1931	0.11342	0.27962	1	5094	0.11342
Tma7	7	0.087747	0.957783	1932	-0.79936	0.70395	1	13898	-0.79936
1700029J07Rik	8	0.094141	0.961376	1933	-0.26762	0.81216	1	15369	-0.26762
Kank4	9	0.096893	0.964318	1934	-0.40903	0.55824	1	10537	-0.40903
Erc1	9	0.0969	0.964318	1935	-0.48946	0.6694	1	12390	-0.48946
H2-M10.1	8	0.094209	0.961376	1936	-0.92462	0.54437	1	10535	-0.92462
Ascc3	9	0.09697	0.964318	1937	0.48989	0.3029	1	5771	0.48989
St3gal4	8	0.094297	0.961376	1938	-0.64082	0.95773	1	18123	-0.64082
Gbp2	10	0.10122	0.969677	1939	-0.76845	0.98285	1	18683	-0.76845
Hist1h4f	9	0.09727	0.96505	1940	-0.049222	0.93533	1	17686	-0.049222
Mphosph8	10	0.10153	0.969737	1941	-0.85904	0.84492	1	15689	-0.85904
Plxnc1	10	0.10153	0.969737	1942	-0.50511	0.91382	1	16970	-0.50511
Pkp1	10	0.10153	0.969737	1943	-0.64709	0.41394	1	7601	-0.64709
Hadha	9	0.097503	0.96505	1944	-0.71257	0.243	1	4495	-0.71257
Kif5c	10	0.10193	0.969737	1945	-0.58143	0.9441	1	17734	-0.58143
Xlr3b	7	0.088507	0.957783	1946	-0.91999	0.91607	1	17490	-0.91999
Amigo3	10	0.10194	0.969737	1947	-0.8889	0.99935	1	19021	-0.8889
Dlg2	10	0.10195	0.969737	1948	-0.86934	0.91158	1	16918	-0.86934
Furin	9	0.097738	0.96505	1949	-0.82405	0.71841	1	13284	-0.82405
Mtcp1	10	0.10202	0.969737	1950	0.15591	0.88439	1	16475	0.15591
AF366264	10	0.10202	0.969737	1951	-0.50305	0.87429	1	16317	-0.50305
4930550C14Rik	10	0.10207	0.969737	1952	0.061214	0.31053	1	5631	0.061214
Apoa1bp	10	0.1021	0.969737	1953	0.087349	0.81481	1	15036	0.087349
Wdr93	10	0.10219	0.969737	1954	-0.57652	0.3252	1	5897	-0.57652
Tmem150b	8	0.095362	0.962926	1955	-0.88802	0.76399	1	14676	-0.88802
Zfp748	9	0.098015	0.96505	1956	-0.83995	0.99114	1	18848	-0.83995
Asf1b	10	0.10234	0.969737	1957	-0.90217	0.93366	1	17475	-0.90217
Tssk2	10	0.10237	0.969737	1958	-0.62973	0.42619	1	7836	-0.62973
Stt3b	9	0.098089	0.96505	1959	-0.8075	0.6122	1	11414	-0.8075
Rfx4	10	0.10245	0.969737	1960	-0.69544	0.59198	1	10759	-0.69544
Fam50b	10	0.10249	0.969737	1961	-0.75728	0.15482	1	2866	-0.75728
Klk1b1	10	0.1026	0.969737	1962	-0.49962	0.79757	1	14651	-0.49962
Ccnb2	9	0.09831	0.96505	1963	-1.0623	0.95837	1	18140	-1.0623
Cyp2d34	10	0.10277	0.969737	1964	-0.77197	0.48808	1	8970	-0.77197
Xylt1	9	0.098436	0.96505	1965	-0.17376	0.87972	1	16526	-0.17376
Vcan	10	0.1029	0.969737	1966	-0.69424	0.9921	1	18873	-0.69424
P2rx3	9	0.098731	0.96505	1967	-0.16696	0.82678	1	15521	-0.16696
Tmem168	10	0.1031	0.969737	1968	-0.75717	0.79757	1	14650	-0.75717
Smg5	10	0.10319	0.969737	1969	-0.7879	0.99603	1	18953	-0.7879
Sohlh1	10	0.10321	0.969737	1970	-0.18042	0.045312	0.844028	1001	-0.18042
Slc34a2	10	0.10321	0.969737	1971	-0.38697	0.80308	1	14772	-0.38697
Rpl23	7	0.089587	0.958079	1972	1.6225	0.038107	0.824973	987	1.6225
Gmeb2	10	0.10331	0.969866	1973	-0.84165	0.93711	1	17551	-0.84165
Calcb	9	0.098958	0.96505	1974	-1.0816	0.58726	1	11004	-1.0816
Dnajc5g	10	0.1034	0.969866	1975	-0.83306	0.26809	1	4893	-0.83306
Ifngr1	9	0.099005	0.96505	1976	0.50531	0.17267	1	3264	0.50531
Sae1	9	0.099041	0.96505	1977	-0.12898	0.18158	1	3407	-0.12898
Selp	10	0.10353	0.969866	1978	-0.7498	0.85016	1	15812	-0.7498
Fbxo21	10	0.10354	0.969866	1979	-0.85672	0.90175	1	16719	-0.85672
Retnlb	10	0.10356	0.969866	1980	0.10997	0.61557	1	11190	0.10997
Lrfn1	9	0.09919	0.96505	1981	-1.0394	0.96179	1	18204	-1.0394
Ypel4	9	0.099192	0.96505	1982	-1.0946	0.82285	1	15451	-1.0946
Npc2	8	0.096819	0.964318	1983	0.56392	0.11834	0.961027	2437	0.56392
Rmi1	9	0.099318	0.96505	1984	0.38433	0.32057	1	6121	0.38433
Itgb8	10	0.10384	0.970033	1985	-0.98674	0.92832	1	17325	-0.98674
Fbxw21	9	0.099496	0.96505	1986	-0.14059	0.87216	1	16324	-0.14059
Lrrc59	9	0.099507	0.96505	1987	-0.32195	0.64276	1	11955	-0.32195
Ckap5	9	0.099507	0.96505	1988	-0.49733	0.33502	1	6363	-0.49733
Nid1	10	0.10421	0.970033	1989	-0.098078	0.66587	1	12189	-0.098078
Ankrd26	10	0.10421	0.970033	1990	0.18591	0.6442	1	11769	0.18591
Sh3bgrl2	9	0.099676	0.96505	1991	-1.2167	0.86574	1	16208	-1.2167
Tspan10	10	0.10431	0.970033	1992	-0.6942	0.79373	1	14558	-0.6942
Lypd3	9	0.099962	0.965454	1993	-0.89264	0.9957	1	18948	-0.89264
Rufy3	10	0.10458	0.970033	1994	-0.027414	0.64999	1	11889	-0.027414
Folh1	10	0.1047	0.970033	1995	0.37061	0.36	1	6570	0.37061
Tmem185b	10	0.10478	0.970033	1996	-0.7891	0.98752	1	18776	-0.7891
1700011E24Rik	9	0.10025	0.966344	1997	-0.42662	0.54633	1	10316	-0.42662
Oma1	10	0.10485	0.970033	1998	-0.54284	0.3279	1	5933	-0.54284
Tnpo3	10	0.10488	0.970033	1999	-0.98642	0.85298	1	15872	-0.98642
[truncated: 17,037 more rows]
